# Supplementary material for: High expression of new genes in trochophore enlightening the ontogeny and evolution of trochozoans
Source: PubMed Central journal article supplement (PMC5048140; doi:10.1038/srep34664), 2016-10-04
Supplement: srep34664-s1.pdf [file srep34664-s1.pdf]

Supplementary Information for

## **High expression of new genes in trochophore enlightening the ontogeny and evolution of trochozoans**

Fei Xu<sup>1,2,3</sup>, Tomislav Domazet-Lošo<sup>4,5</sup>, Dingding Fan<sup>6</sup>, Thomas L. Dunwell<sup>7</sup>, Li Li<sup>1,2,3</sup>,  
Xiaodong Fang<sup>6</sup>, Guofan Zhang<sup>1,2,3#</sup>

<sup>1</sup>Key Laboratory of Experimental Marine Biology, Institute of Oceanology, Chinese Academy of Sciences, Qingdao 266071, China

<sup>2</sup>Laboratory for Marine Biology and Biotechnology, Qingdao National Laboratory for Marine Science and Technology, Qingdao 266071, China

<sup>3</sup>National & Local Joint Engineering Laboratory of Ecological Mariculture, Institute of Oceanology, Chinese Academy of Sciences, Qingdao 266071, China

<sup>4</sup>Laboratory of Evolutionary Genetics, Ruđer Bošković Institute, Bijenička cesta 54, P.P. 180, HR-10002, Zagreb, Croatia.

<sup>5</sup>Catholic university of Croatia, Ilica 242, HR-10000, Zagreb, Croatia

<sup>6</sup>BGI-Shenzhen, Shenzhen, 518083, China.

<sup>7</sup>Department of Zoology, University of Oxford, South Parks Road, Oxford, OX1 3PS UK.

#Corresponding author: G.Z. (gzhang@qdio.ac.cn).

### **This file includes:**

Supplementary figures S1-S9

Supplementary tables S1-S8

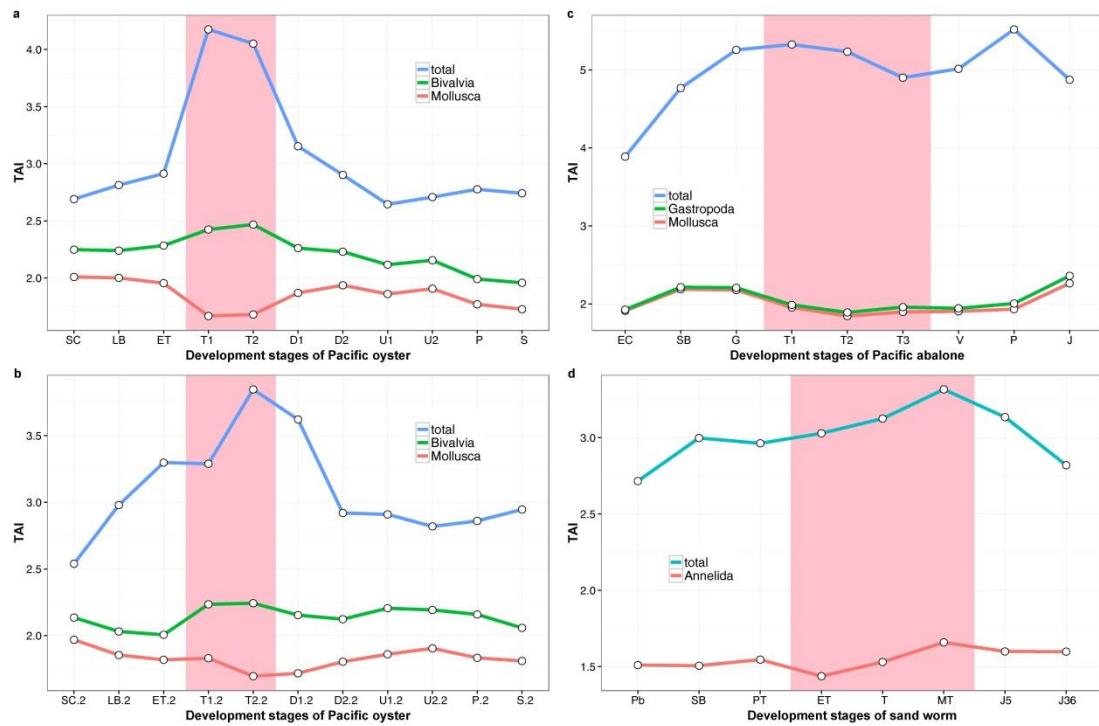

**Figure S1 | Transcriptome age indices across the ontogeny of the Pacific oyster, *Crassostrea gigas* (a and b indicate the two experimental replicates), the Pacific abalone, *Haliotis discus hannai* (c), and the sand worm *Perinereis aibuhitensis* (d).** The blue lines indicate the total cumulative value of the TAI. The green lines in panels a and b show TAI calculated for phylostrata older than Bivalvia (ps1-ps10). The green lines in panel c represent TAI calculated for phylostrata older than Gastropoda (ps1-ps10). The red lines in panels a, b, and c show TAI for phylostrata older than Mollusca (ps1-ps9), while the red line in panel d represents TAI for phylostrata older than Annelida (ps1-ps9). The developmental stages and their timelines are defined in Table S1-S4. The area with pink background designates the trochophore stage of each species.

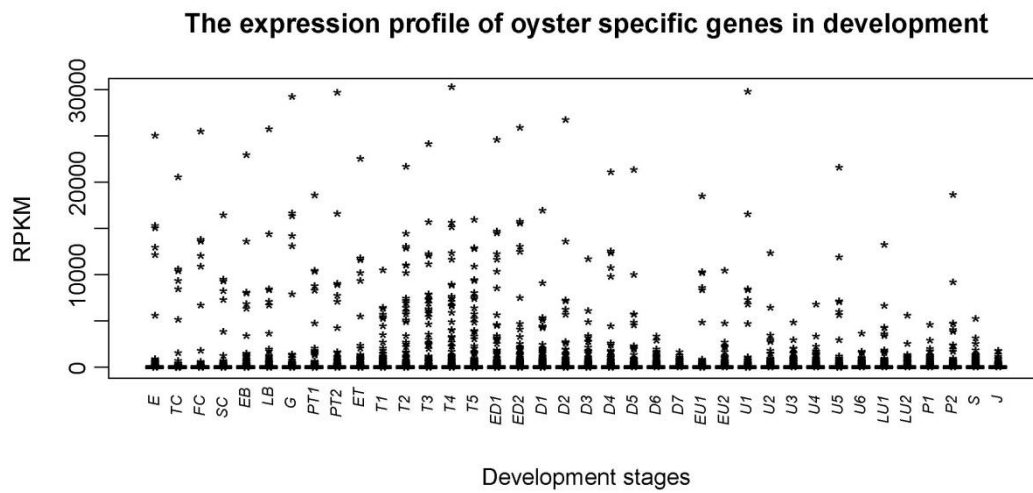

Figure S2 | **Distribution of RPKM value of all the annotated genes in the genome across different development stages.** Some genes showed high expression level at trochophore stage, mainly including 51 genes from ps11 (oyster-specific) and 5 genes from ps10 (Bivalvia-specific). Details of these 56 genes were shown in Table S1.

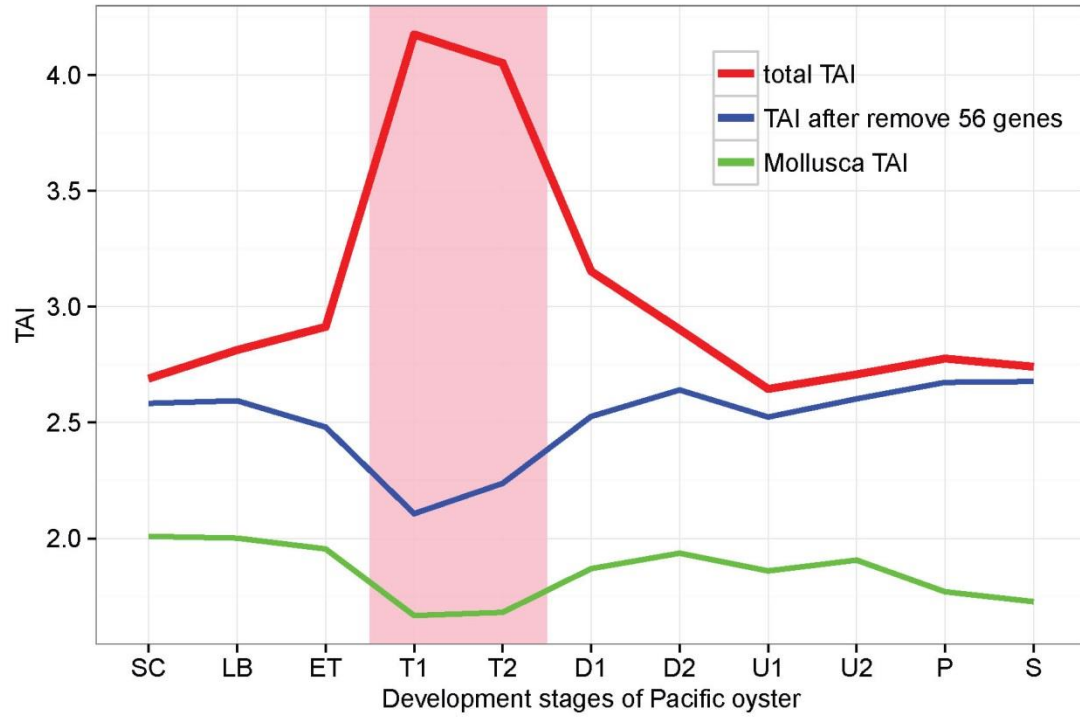

Figure S3 | **Dissection of the TAI composition by isolating the 56 genes (shown in Figure S3 and Table S1) mainly contributing to the high TAI value at trochophore stage.**

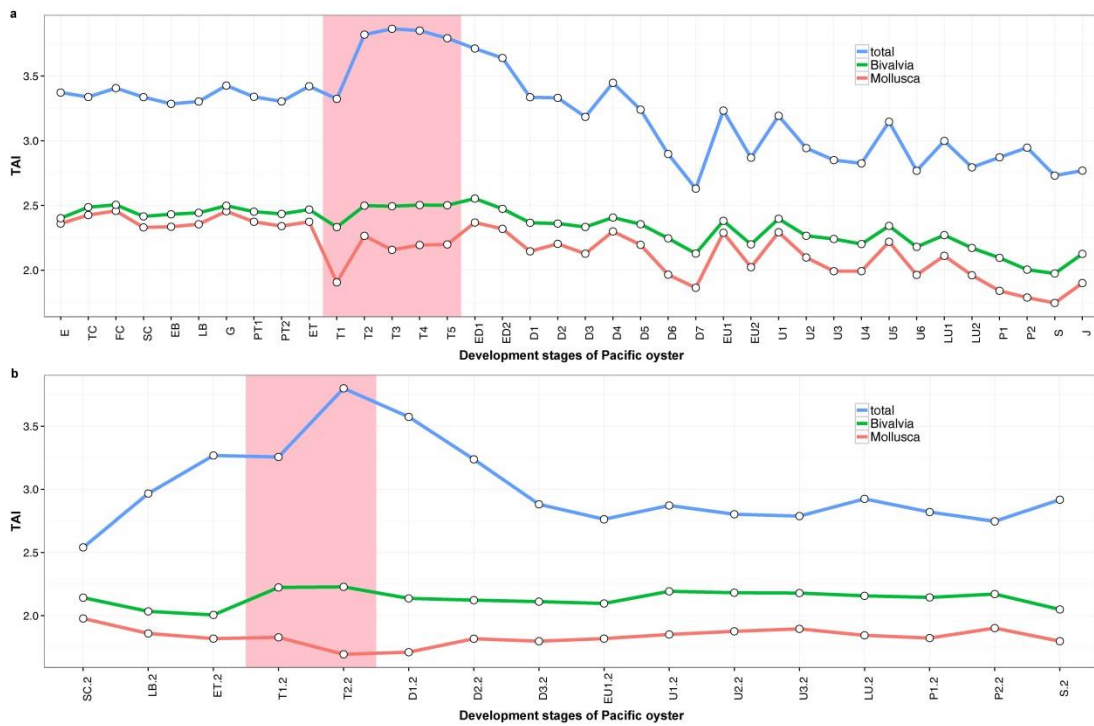

Figure S4 | **Transcriptome age indices across the ontogeny of the Pacific oyster, *Crassostrea gigas*.** TAI values for all the sequenced development stages were calculated using all the predicted genes of each genome. It can be seen that the selected typical development stages shown in Figure S1a & S1b can well reflect the pattern in this figure.

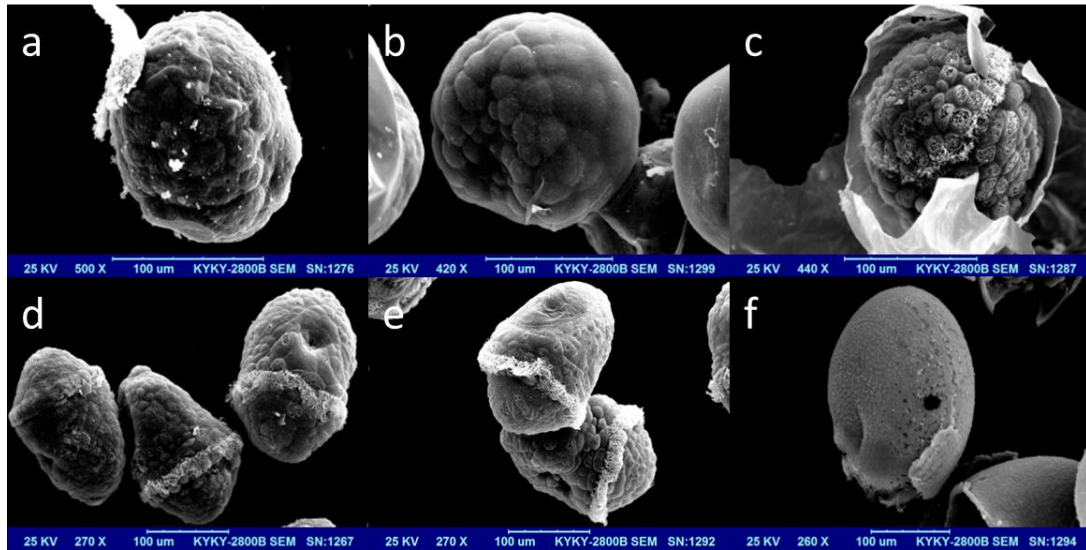

Figure S5 | **The embryonic and larval development of Pacific abalone *Haliotis discus hannai*.**

**a.** Stereoblastula stage at about 200 min post fertilization. **b.** Gastrula at 6 h post fertilization. **c.** Trochophore at 10.5 h post fertilization. The larvae was still in the egg envelope. **d.** Trochophore at 13.5 h post fertilization. Free swimming larvae hatched, and the shell field formed. **e.** Early veliger larvae at 15 h post fertilization. The shell field expanded at the dorsal side of the larvae. **f.** Veliger larvae at 25 h post fertilization. The calcified adult-like shell formed.

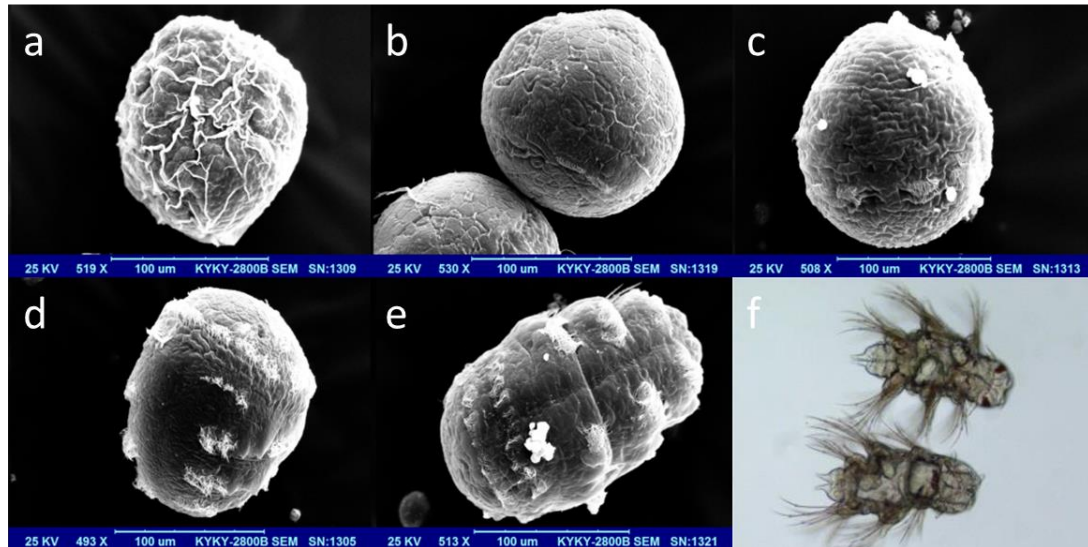

Figure S6 | **The embryonic and larval development of sand worm *Perinereis aibuhitensis*.**

**a.** Stereoblastula stage at 8 h post fertilization. The white lines at the surface of the embryo were wrinkles formed by the jelly around the embryo. **b.** Prototrochophore at 14 h post fertilization. **c.** Trochophore at 26 h post fertilization. The larvae was still in the jelly. The prototroch formed at this stage. **d.** Metatrochophore at 30.5 h post fertilization. Three segments are visible, and the chaetae formed in the trunk. **e.** Juvenile in the jelly with three setigers (or metatrochophore), 36 h post fertilization. **f.** Juvenile with three setigers (or nectochaete) at 2.5 d post fertilization. This photo was taken with the light microscope.

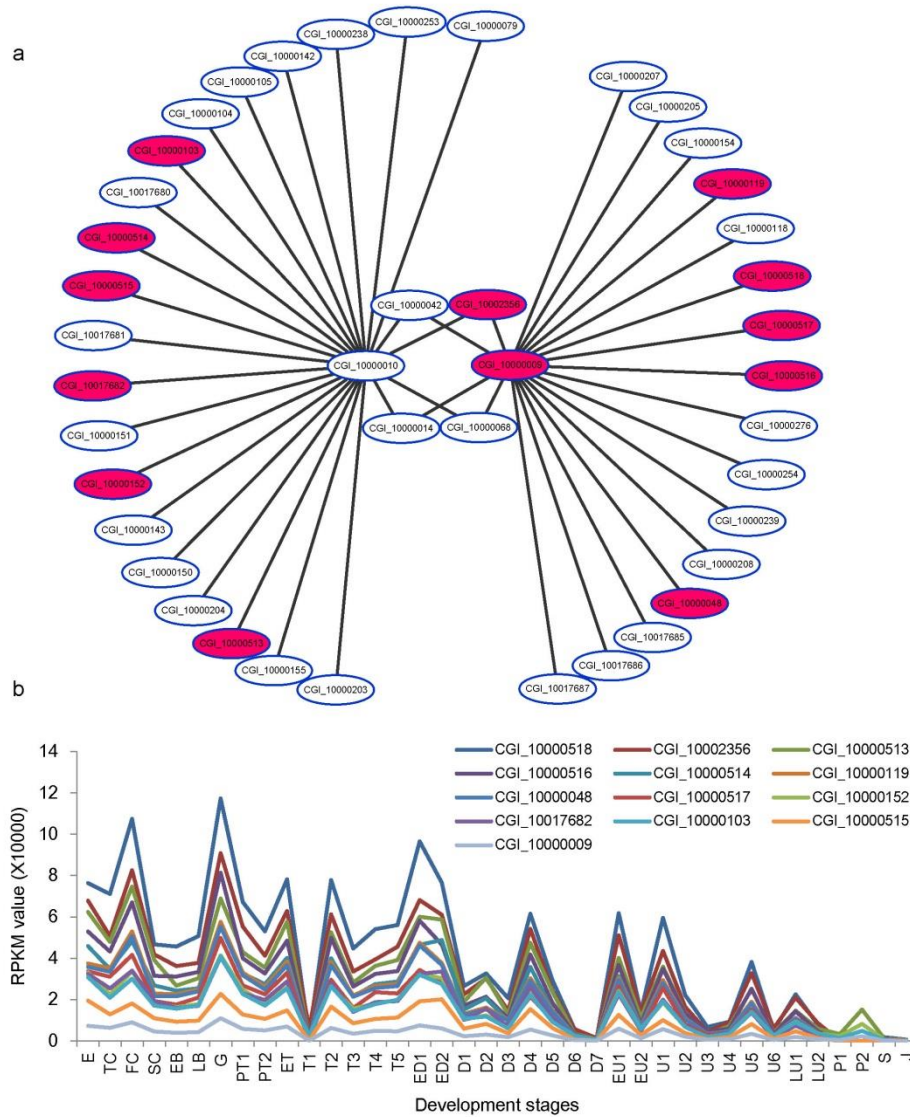

Figure S7 | **Genes filtered out through the expression pattern.**

Thirteen additional genes were discarded (the red color filled ellipses in panel a, and the genes listed in panel b) during the TAI analysis. These genes showed very similar expression pattern (Pearson correlation coefficients were larger than 0.99, panel a & b) and fluctuating expression curve along the ontogeny (panel b). They had short nucleotide sequences (186-465 bp) and extremely high expression levels in most samples (RPKM was as high as 120,000). These genes were thus considered to be some kind of special genomic elements, such as retrotransposon.



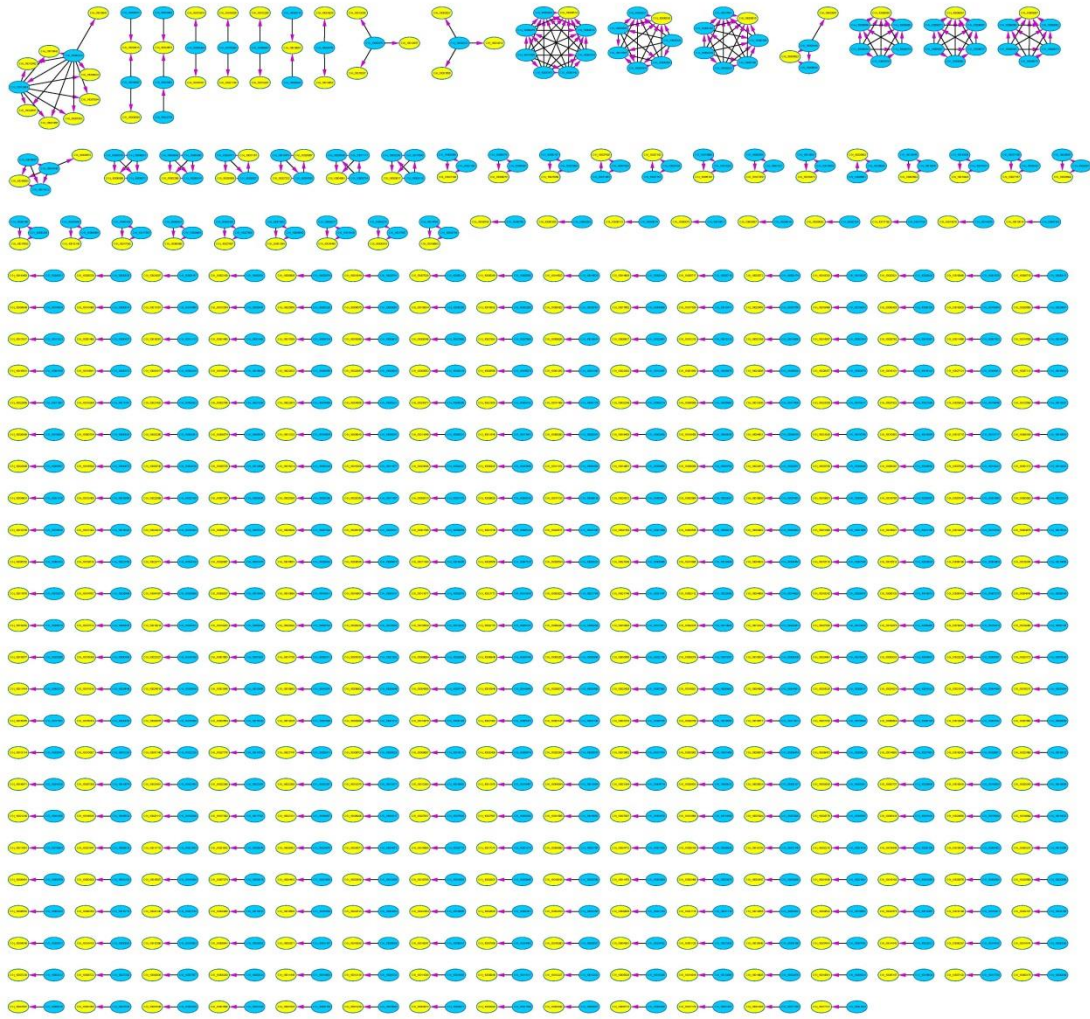

Figure S8 | **Genes filtered out through sequence redundant analysis.**

The ellipse filled with yellow color shows the genes which were retained, while the blue filled color shows the genes which were discarded. The target (the ellipse arrow is pointing) was defined as the genes with equal or larger length than the source (the ellipse at the other side of the arrowed line). In this case, all the source genes were discarded, and only the gene which was target for all the related genes (there are only arrow point around the gene) was retained. The following criteria were used to identify redundant genes: 1. When the query and target genes had different length, the shorter one should aligned onto the longer one completely. 2. The protein sequences should be at least 97% identities in the alignment region, while the DNA sequences should be at least 95%. 3. There should be not any gap in the aligned protein region.

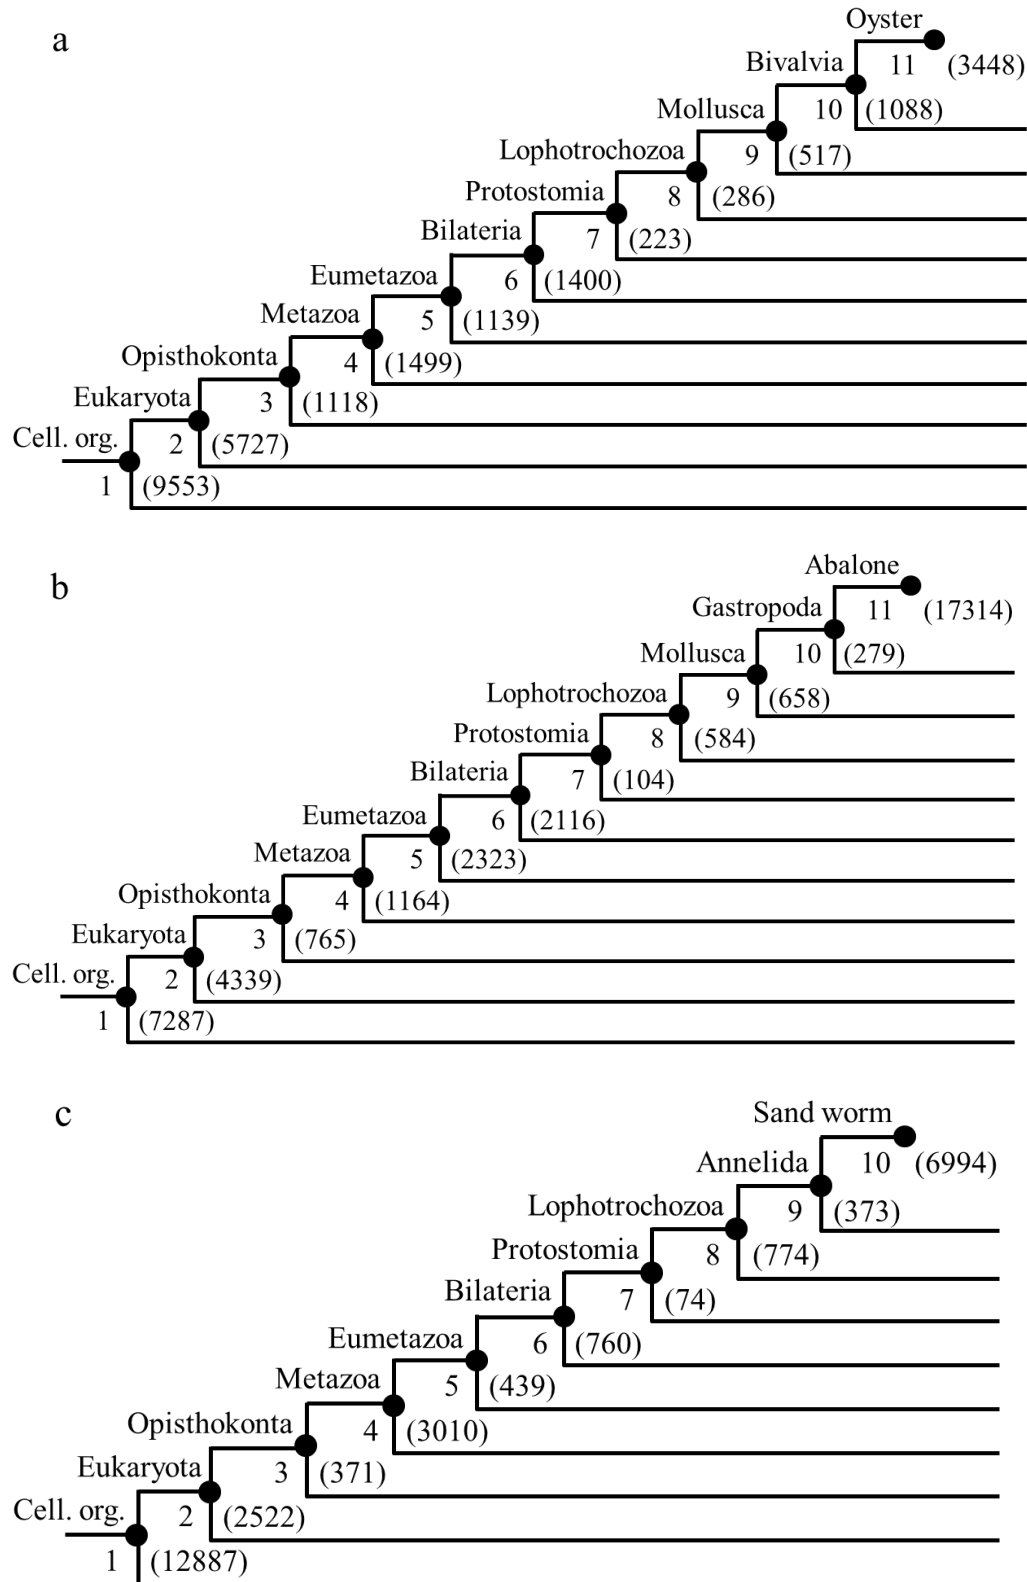

Figure S9 | **Phylostratigraphic map of oyster (a), abalone (b) and sand worm (c).** The numbers at the lower left of each spot denote the number phylostrata, while the numbers in parenthesis at the lower right denote the number of genes per phylostratum. Cell. org., cellular organisms.

**Table S1 | Details of the 56 genes highly expressed in trochophore stages, and mainly contributing to the high value of the total TAI. “NA” in the IPR, GO, KEGG, TrEMBL columns indicate the corresponding annotation is not available. Value in each development stage is the TAI value of each gene in the corresponding development stage (calculated by  $ps_i f_i$ , see reference 10 in the main text for more details).**

| Gene ID      | theta    | IPR | GO | KEGG | TrEMBL | Length<br>(bp) | Age<br>(ps) | SC       | LB       | ET       | T1       | T2       | D1       | D2       | U1       | U2       | P        | S        |
|--------------|----------|-----|----|------|--------|----------------|-------------|----------|----------|----------|----------|----------|----------|----------|----------|----------|----------|----------|
| CGI_10006331 | 0.003223 | NA  | NA | NA   | NA     | 1137           | 11          | 0        | 7.25E-06 | 0.000125 | 0.003297 | 0.002794 | 0.000697 | 0.000297 | 9.67E-05 | 7.82E-05 | 4.45E-05 | 1.60E-05 |
| CGI_10003033 | NA       | NA  | NA | NA   | NA     | 771            | 11          | 1.76E-06 | 4.28E-06 | 0.000315 | 0.003359 | 0.003619 | 0.003271 | 0.001699 | 0.000813 | 0.000533 | 0        | 0.000198 |
| CGI_10025597 | 0.014716 | NA  | NA | NA   | NA     | 747            | 11          | 0.000104 | 3.53E-05 | 0.000238 | 0.003367 | 0.002464 | 0.001024 | 0.00041  | 0.0002   | 0.000145 | 0.000101 | 3.40E-05 |
| CGI_10022474 | NA       | NA  | NA | NA   | NA     | 228            | 11          | 0.001036 | 0.0036   | 0.007911 | 0.003432 | 0.003281 | 0.002826 | 0.001458 | 0.001913 | 0.001697 | 0.002027 | 0.002055 |
| CGI_10000269 | 0.008542 | NA  | NA | NA   | NA     | 264            | 11          | 1.03E-05 | 5.62E-05 | 0.000539 | 0.003432 | 0.003466 | 0.000605 | 0.000197 | 4.43E-06 | 0        | 0        | 6.88E-06 |
| CGI_10013629 | 0.011745 | NA  | NA | NA   | NA     | 264            | 11          | 0.004138 | 0.00216  | 0.004225 | 0.003556 | 0.001489 | 0.00087  | 0.001139 | 0.00058  | 0.000937 | 0.001696 | 0.003027 |
| CGI_10023289 | 0.001362 | NA  | NA | NA   | NA     | 621            | 11          | 0        | 2.65E-06 | 0.001777 | 0.003671 | 0.004264 | 0.002558 | 0.003561 | 0.000573 | 0.000491 | 0.001006 | 0.00048  |
| CGI_10004597 | 0.005369 | NA  | NA | NA   | NA     | 315            | 11          | 0.000965 | 0.001769 | 0.004125 | 0.003685 | 0.003667 | 0.002989 | 0.001826 | 0.001619 | 0.001724 | 0.000951 | 0.000963 |
| CGI_10005680 | 0.004651 | NA  | NA | NA   | NA     | 606            | 11          | 3.36E-05 | 4.62E-05 | 0.000299 | 0.003777 | 0.008682 | 0.007638 | 0.010906 | 0.003347 | 0.004108 | 0.003622 | 0.003407 |
| CGI_10022167 | 0.004153 | NA  | NA | NA   | NA     | 543            | 11          | 2.50E-06 | 0        | 6.56E-05 | 0.003927 | 0.006049 | 0.001027 | 0.001113 | 0.000379 | 0.000296 | 0.000183 | 9.03E-05 |
| CGI_10025265 | 0.012723 | NA  | NA | NA   | NA     | 288            | 11          | 0.004925 | 0.007132 | 0.006252 | 0.003957 | 0.004531 | 0.002432 | 0.002098 | 0.001714 | 0.001902 | 0.001347 | 0.002617 |
| CGI_10018867 | 0.005066 | NA  | NA | NA   | NA     | 612            | 11          | 7.76E-05 | 5.39E-05 | 0.000974 | 0.004121 | 0.001012 | 0.00044  | 0.00043  | 0.000564 | 0.000569 | 0.001734 | 0.001163 |
| CGI_10003505 | 0.011564 | NA  | NA | NA   | NA     | 390            | 11          | 0.017233 | 0.020647 | 0.007469 | 0.004126 | 0.002346 | 0.00245  | 0.001342 | 5.10E-05 | 3.70E-05 | 2.78E-05 | 6.52E-05 |
| CGI_10024593 | 0.004732 | NA  | NA | NA   | NA     | 417            | 11          | 0        | 0        | 0.000114 | 0.004145 | 0.004781 | 0.001384 | 0.000402 | 0.000485 | 0.000248 | 0.000922 | 8.71E-06 |
| CGI_10002843 | NA       | NA  | NA | NA   | NA     | 384            | 11          | 7.07E-06 | 8.59E-06 | 0.00061  | 0.004233 | 0.005401 | 0.018161 | 0.023504 | 0.007934 | 0.00117  | 0        | 8.51E-05 |
| CGI_10027216 | 0.021667 | NA  | NA | NA   | NA     | 1392           | 11          | 2.93E-06 | 2.37E-06 | 4.48E-05 | 0.004594 | 0.011136 | 0.010535 | 0.001786 | 0.000302 | 0.00049  | 0.002628 | 0.000301 |
| CGI_10027684 | 0.01188  | NA  | NA | NA   | NA     | 261            | 11          | 0        | 0.000221 | 0.003364 | 0.00502  | 0.003626 | 0.002823 | 0.000576 | 0.000314 | 0.000166 | 0.000228 | 0.000118 |
| CGI_10014829 | NA       | NA  | NA | NA   | NA     | 327            | 11          | 0.013335 | 0.013838 | 0.00655  | 0.005142 | 0.00532  | 0.001602 | 0.001529 | 0.003391 | 0.004093 | 0.00016  | 0.003482 |
| CGI_10013300 | 0.01439  | NA  | NA | NA   | NA     | 333            | 11          | 4.08E-06 | 0        | 5.34E-05 | 0.005295 | 0.007983 | 0.005713 | 0.0025   | 0.000688 | 0.000613 | 0.000282 | 1.64E-05 |
| CGI_10021124 | 0.01634  | NA  | NA | NA   | NA     | 207            | 11          | 0.000354 | 0.005017 | 0.005446 | 0.005303 | 0.017499 | 0.014199 | 0.016676 | 0.004983 | 0.003343 | 0.005153 | 0.004755 |
| CGI_10015394 | 0.008654 | NA  | NA | NA   | NA     | 456            | 11          | 0.007182 | 0.006337 | 0.004996 | 0.005665 | 0.007974 | 0.009745 | 0.008312 | 0.015228 | 0.011693 | 0.01463  | 0.00906  |

|              |          |    |    |    |    |      |    |          |          |          |          |          |          |          |          |          |          |          |
|--------------|----------|----|----|----|----|------|----|----------|----------|----------|----------|----------|----------|----------|----------|----------|----------|----------|
| CGI_10023434 | 0.005338 | NA | NA | NA | NA | 264  | 11 | 0.002226 | 0.004121 | 0.005562 | 0.005777 | 0.005509 | 0.004702 | 0.003658 | 0.00198  | 0.002075 | 0.002844 | 0.002084 |
| CGI_10013302 | 0.012986 | NA | NA | NA | NA | 369  | 11 | 4.78E-05 | 0.000277 | 0.000981 | 0.006057 | 0.007374 | 0.000995 | 0.000266 | 0        | 6.51E-06 | 1.47E-05 | 9.84E-06 |
| CGI_10002107 | 0.001515 | NA | NA | NA | NA | 372  | 11 | 0.009285 | 0.00588  | 0.008955 | 0.006065 | 0.005986 | 0.004459 | 0.004173 | 0.002773 | 0.002519 | 0.00231  | 0.003188 |
| CGI_10020278 | 0.006909 | NA | NA | NA | NA | 204  | 11 | 0.009913 | 0.042923 | 0.020111 | 0.006159 | 0.002286 | 0.000852 | 0.000312 | 4.59E-05 | 0        | 8.85E-06 | 8.90E-06 |
| CGI_10008847 | 0.004503 | NA | NA | NA | NA | 3693 | 11 | 6.25E-06 | 2.68E-06 | 0.002293 | 0.00655  | 0.002719 | 0.001382 | 0.000726 | 0.000275 | 0.000239 | 9.38E-05 | 6.88E-06 |
| CGI_10000377 | 0.004836 | NA | NA | NA | NA | 408  | 11 | 0.011343 | 0.039344 | 0.019835 | 0.006589 | 0.002209 | 0.000982 | 0.000439 | 6.31E-05 | 8.24E-05 | 8.85E-05 | 2.23E-05 |
| CGI_10000706 | 0.005935 | NA | NA | NA | NA | 2802 | 11 | 6.25E-05 | 9.06E-05 | 0.002793 | 0.006825 | 0.004094 | 0.001171 | 0.000482 | 0.000411 | 0.000308 | 0.00039  | 0.000134 |
| CGI_10000270 | 0.001445 | NA | NA | NA | NA | 195  | 11 | 0.010106 | 0.03864  | 0.020978 | 0.006923 | 0.001999 | 0.001121 | 0.000371 | 3.60E-05 | 4.93E-05 | 1.85E-05 | 0        |
| CGI_10021631 | 0.005806 | NA | NA | NA | NA | 1068 | 11 | 5.08E-06 | 0        | 0.000306 | 0.007853 | 0.004261 | 0.005759 | 0.009785 | 0.007308 | 0.004088 | 0.000808 | 4.08E-05 |
| CGI_10013422 | 0.015659 | NA | NA | NA | NA | 306  | 11 | 0.000124 | 0.00014  | 0.000553 | 0.008174 | 0.013873 | 0.008937 | 0.001219 | 0.000604 | 0.00084  | 0.000926 | 0.000558 |
| CGI_10008846 | 0.007517 | NA | NA | NA | NA | 225  | 11 | 5.43E-05 | 1.47E-05 | 0.003718 | 0.009207 | 0.006062 | 0.002503 | 0.001773 | 0.000509 | 0.00032  | 0.000233 | 2.42E-05 |
| CGI_10017441 | 0.011206 | NA | NA | NA | NA | 327  | 11 | 0        | 8.07E-05 | 5.44E-05 | 0.009371 | 0.03105  | 0.027119 | 0.000937 | 1.07E-05 | 0        | 0        | 0        |
| CGI_10007670 | 0.007718 | NA | NA | NA | NA | 840  | 11 | 1.13E-05 | 0.000679 | 0.000247 | 0.009392 | 0.01014  | 0.003015 | 0.003156 | 0.000515 | 0.001181 | 0.002714 | 0.005493 |
| CGI_10024592 | 0.007626 | NA | NA | NA | NA | 924  | 11 | 1.47E-06 | 1.78E-06 | 0.000299 | 0.009949 | 0.018516 | 0.011787 | 0.004534 | 0.002278 | 0.002036 | 0.001031 | 6.49E-05 |
| CGI_10016774 | 0.012363 | NA | NA | NA | NA | 570  | 11 | 0        | 4.05E-05 | 0.004554 | 0.010711 | 0.001972 | 0.000157 | 0        | 4.10E-06 | 0        | 9.50E-06 | 3.19E-06 |
| CGI_10021950 | 0.006711 | NA | NA | NA | NA | 336  | 11 | 0        | 0        | 0.000115 | 0.014541 | 0.012033 | 0.001059 | 0.000783 | 0.000435 | 0.001402 | 0.001155 | 7.57E-05 |
| CGI_10018236 | NA       | NA | NA | NA | NA | 156  | 11 | 8.70E-05 | 0.000127 | 0.004298 | 0.015046 | 0.029866 | 0.025414 | 0.036211 | 0.009102 | 0.015557 | 0.003147 | 0.00986  |
| CGI_10012511 | 0.007765 | NA | NA | NA | NA | 363  | 11 | 0        | 1.82E-05 | 0.000605 | 0.015654 | 0.015241 | 0.008004 | 0.000398 | 0        | 6.62E-06 | 0        | 0        |
| CGI_10015606 | 0.001833 | NA | NA | NA | NA | 615  | 11 | 0.014013 | 0.02526  | 0.023963 | 0.020214 | 0.014303 | 0.012934 | 0.010191 | 0.005352 | 0.009889 | 0.007719 | 0.004409 |
| CGI_10022617 | 0.006923 | NA | NA | NA | NA | 285  | 11 | 0        | 5.78E-06 | 0.001447 | 0.030804 | 0.003333 | 0.000501 | 0.00071  | 0.000213 | 0.000287 | 4.43E-05 | 1.27E-05 |
| CGI_10016224 | 0.004385 | NA | NA | NA | NA | 450  | 11 | 9.05E-06 | 3.66E-06 | 0.000422 | 0.033164 | 0.073658 | 0.084237 | 0.034152 | 0.004091 | 0.002275 | 0.009149 | 0.000601 |
| CGI_10005282 | 0.004176 | NA | NA | NA | NA | 540  | 11 | 7.54E-06 | 9.16E-06 | 0.010707 | 0.049664 | 0.05702  | 0.072999 | 0.038841 | 0.020431 | 0.01597  | 0.018334 | 0.002815 |
| CGI_10012510 | 0.001879 | NA | NA | NA | NA | 150  | 11 | 0        | 0        | 0.001384 | 0.053654 | 0.062655 | 0.031474 | 0.000347 | 0        | 0        | 0        | 2.42E-05 |
| CGI_10001095 | 0.003693 | NA | NA | NA | NA | 687  | 11 | 5.93E-06 | 4.80E-06 | 0.002958 | 0.067566 | 0.027816 | 0.00217  | 0.000644 | 6.81E-06 | 1.75E-05 | 1.58E-05 | 2.64E-06 |
| CGI_10013406 | 0.005045 | NA | NA | NA | NA | 894  | 11 | 3.04E-06 | 2.77E-05 | 0.024797 | 0.113303 | 0.043183 | 0.003087 | 7.76E-05 | 1.31E-05 | 0        | 0        | 6.09E-06 |
| CGI_10007242 | 0.002936 | NA | NA | NA | NA | 384  | 11 | 0        | 1.29E-05 | 0.020626 | 0.118837 | 0.062587 | 0.011434 | 0.0032   | 0.001715 | 0.001283 | 0.001598 | 0.000459 |

---

|              |          |    |    |    |    |      |    |          |          |          |          |          |          |          |          |          |          |          |
|--------------|----------|----|----|----|----|------|----|----------|----------|----------|----------|----------|----------|----------|----------|----------|----------|----------|
| CGI_10013407 | 0.004207 | NA | NA | NA | NA | 402  | 11 | 0        | 0        | 0.018559 | 0.137533 | 0.090287 | 0.002154 | 7.19E-06 | 0        | 0        | 0        | 0        |
| CGI_10025784 | 0.005079 | NA | NA | NA | NA | 444  | 11 | 8.56E-05 | 0.000111 | 0.022923 | 0.14731  | 0.11825  | 0.021134 | 0.0014   | 0.000271 | 5.95E-05 | 0        | 4.09E-06 |
| CGI_10014301 | 0.00375  | NA | NA | NA | NA | 1353 | 11 | 1.00E-06 | 2.44E-06 | 0.004635 | 0.216347 | 0.201727 | 0.012226 | 0.000389 | 0.00011  | 9.06E-05 | 9.47E-05 | 8.05E-06 |
| CGI_10025785 | 0.006236 | NA | NA | NA | NA | 678  | 11 | 0.000142 | 0.000182 | 0.045993 | 0.284311 | 0.238242 | 0.040987 | 0.003757 | 0.000668 | 0.000131 | 0        | 5.36E-06 |
| CGI_10002165 | 0.003111 | NA | NA | NA | NA | 453  | 10 | 1.63E-05 | 6.62E-06 | 0.001298 | 0.039895 | 0.035152 | 0.026444 | 0.01368  | 0.016723 | 0.010213 | 0.012725 | 0.001436 |
| CGI_10016777 | 0.004497 | NA | NA | NA | NA | 1191 | 10 | 6.22E-06 | 1.01E-05 | 0.017064 | 0.066109 | 0.063081 | 0.010747 | 6.18E-05 | 4.46E-06 | 0        | 2.76E-06 | 2.77E-06 |
| CGI_10002164 | 0.003153 | NA | NA | NA | NA | 447  | 10 | 0        | 1.68E-05 | 0.010461 | 0.116134 | 0.096815 | 0.007915 | 0.000958 | 3.09E-05 | 0.000137 | 0.000529 | 0.000524 |
| CGI_10025032 | 0.003226 | NA | NA | NA | NA | 699  | 10 | 0        | 0        | 0.025756 | 0.129253 | 0.124425 | 0.017925 | 0.000274 | 4.56E-06 | 3.44E-05 | 1.88E-05 | 2.83E-05 |
| CGI_10025031 | 0.001773 | NA | NA | NA | NA | 318  | 10 | 0        | 5.65E-05 | 0.048152 | 0.196869 | 0.215289 | 0.06581  | 0.001678 | 2.67E-05 | 6.87E-06 | 0        | 0        |

---

Table S2 | **Summary of all the sampled developmental stages of Pacific oyster from the first replicate.** Stages with an asterisk in the column “Typical” are those chosen as typical development stages for the data analysis in this study.

| Stages dividing strategy | Figure label | Developmental age | Seawater temperature ( °C) | Developmental stage | Typical |
|--------------------------|--------------|-------------------|----------------------------|---------------------|---------|
| Eggs                     | E            | 0 h 00 min        | 26                         | Egg                 |         |
| Embryogenesis            | TC           | 1 h 20 min        | 26                         | Two cells           |         |
|                          | FC           | 1 h 32 min        | 26                         | Four cells          |         |
|                          | SC           | 2 h 25 min        | 26                         | Sixteen cells       | *       |
|                          | EB           | 3 h 30 min        | 26                         | Early blastula      |         |
|                          | LB           | 4 h 35 min        | 26                         | Late blastula       | *       |
|                          | G            | 5 h 30 min        | 26                         | Gastrula            |         |
|                          | PT1          | 6 h 35 min        | 26                         | Pre-trochophore     |         |
|                          | PT2          | 7 h 35 min        | 26                         | Pre-trochophore     |         |
| Trochophore              | ET           | 8 h 30 min        | 26                         | Early trochophore   | *       |
|                          | T1           | 9 h 30 min        | 26                         | Trochophore         |         |
|                          | T2           | 11 h 35 min       | 26                         | Trochophore         | *       |
|                          | T3           | 12 h 35 min       | 26                         | Trochophore         |         |
|                          | T4           | 13 h 35 min       | 26                         | Trochophore         |         |
| D-shape larvae           | T5           | 14 h 35 min       | 26                         | Trochophore         | *       |
|                          | ED1          | 15 h 30 min       | 26                         | Early D-shape larva |         |
|                          | ED2          | 16 h 35 min       | 26                         | Early D-shape larva |         |
|                          | D1           | 17 h 35 min       | 26                         | D-shape larva       | *       |
|                          | D2           | 18 h 35 min       | 26                         | D-shape larva       |         |
|                          | D3           | 19 h 35 min       | 26                         | D-shape larva       |         |
|                          | D4           | 20 h 35 min       | 26                         | D-shape larva       |         |
|                          | D5           | 1.09 d            | 26                         | D-shape larva       | *       |
| Umbo larvae              | D6           | 1.75 d            | 26                         | D-shape larva       |         |
|                          | D7           | 3.77 d            | 26                         | D-shape larva       |         |
|                          | EU1          | 4.77 d            | 25                         | Early umbo larva    |         |
|                          | EU2          | 6.75 d            | 25                         | Early umbo larva    |         |
|                          | U1           | 7.75 d            | 25                         | Umbo larva          | *       |
|                          | U2           | 8.75 d            | 25                         | Umbo larva          |         |
|                          | U3           | 9.75 d            | 25                         | Umbo larva          |         |
|                          | U4           | 10.77 d           | 25                         | Umbo larva          |         |
| Pediveliger              | U5           | 12.76 d           | 25                         | Umbo larva          |         |
|                          | U6           | 13.75 d           | 25                         | Umbo larva          | *       |
|                          | LU1          | 14.73 d           | 25                         | Later umbo larva    |         |
|                          | LU2          | 15.73 d           | 25                         | Later umbo larva    |         |
| Spat                     | P1           | 18.03 d           | 25                         | Pediveliger         |         |
|                          | P2           | 18.19 d           | 25                         | Pediveliger         | *       |
| Juvenile                 | J            | 215 d             | Ambient, sea               | Juvenile            | *       |

**Table S3 | Summary of all the sampled developmental stages of Pacific oyster from the second replicate.** Stages with an asterisk in the column “Typical” are those chosen as typical development stages for the data analysis in this study.

| <b>Stages dividing strategy</b> | <b>Figure label</b> | <b>Developmental age</b> | <b>Seawater temperature ( °C)</b> | <b>Developmental stage</b> | <b>Typical</b> |
|---------------------------------|---------------------|--------------------------|-----------------------------------|----------------------------|----------------|
| Embryogenesis                   | SC.2                | 2 h 25 min               | 22                                | Sixteen cells              | *              |
|                                 | LB.2                | 4 h 35 min               | 22                                | Late blastula              | *              |
|                                 | ET.2                | 8 h 30 min               | 22                                | Early trochophore          | *              |
| Trochophore                     | T1.2                | 12 h 35 min              | 22                                | Trochophore                | *              |
|                                 | T2.2                | 14 h 35 min              | 22                                | Trochophore                | *              |
| D-shape larvae                  | D1.2                | 1.09 d                   | 22                                | D-shape larva              | *              |
|                                 | D2.2                | 1.75 d                   | 22                                |                            |                |
|                                 | D3.2                | 3.77 d                   | 22                                |                            | *              |
| Umbo larvae                     | EU.2                | 7.75 d                   | 22                                |                            |                |
|                                 | U1.2                | 11.75 d                  | 22                                | Umbo larva                 | *              |
|                                 | U2.2                | 16.75 d                  | 22                                |                            |                |
|                                 | U3.2                | 26 d                     | 22                                | Umbo larva                 | *              |
|                                 | LU.2                | 28 d                     | 22                                |                            |                |
| Pediveliger                     | P1.2                | 34 d                     | 22                                | Pediveliger                | *              |
|                                 | P2.2                | 37 d                     | 22                                |                            |                |
| Spat                            | S                   | 44 d                     | 22                                | Spat                       | *              |

**Table S4 | Summary of developmental stages of Pacific abalone.**

| <b>Stages dividing strategy</b> | <b>Figure label</b> | <b>Developmental age</b> | <b>Seawater temperature ( °C)</b> | <b>Developmental stage</b> |
|---------------------------------|---------------------|--------------------------|-----------------------------------|----------------------------|
| Embryogenesis                   | EC                  | 2 h                      | 21.5                              | Eight cells                |
|                                 | SB                  | 3 h 15 min               | 21.5                              | Stereoblastula             |
|                                 | G                   | 6 h                      | 21.5                              | Gastrula                   |
| Trochophore                     | T1                  | 7 h 30 min               | 22                                | Trochophore                |
|                                 | T2                  | 10 h 30 min              | 22                                | Trochophore                |
|                                 | T3                  | 13 h 30 min              | 22                                | Trochophore                |
| Veliger                         | V                   | 43 h                     | 22                                | Veliger                    |
| Groveling larvae                | P                   | 79 h                     | 22                                | Pediveliger                |
| Juvenile                        | J                   | 1 year                   | Ambient                           | Juvenile                   |



**Table S5 | Summary of developmental stages of sand worm.**

| <b>Stages dividing strategy</b> | <b>Figure label</b> | <b>Developmental age</b> | <b>Seawater temperature ( °C)</b> | <b>Developmental stage</b>   |
|---------------------------------|---------------------|--------------------------|-----------------------------------|------------------------------|
|                                 | Pb                  | 2:12                     | 22-25                             | 1st polar body               |
| Embryogenesis                   | SB                  | 8:07                     | 25                                | Stereoblastula               |
|                                 | PT                  | 14:07                    | 25                                | Protrochophore               |
| Trochophore                     | ET                  | 1 d 2:17                 | 25                                | Early trochophore            |
|                                 | T                   | 1 d 6:47                 | 25                                | Trochophore                  |
|                                 | MT                  | 1 d 11:57                | 25                                | Metatrochophore              |
| Juvenile                        | J5                  | 9 d                      | 25                                | Juvenile with 5-6 setigers   |
|                                 | J36                 | 37 d                     | 25                                | Juvenile with 36-47 setigers |

**Table S6 | The reads hit number data of oyster, abalone and sand worm.**  
See the excel file.

**Table S7 | The value of theta per nucleotide site for each oyster gene calculated with DnaSP software.**

See the excel file.

Table S8 | **The 3,915 genomes used in the phylostratigraphic analysis.**

| Phylostrata | Name         | Species                                   |
|-------------|--------------|-------------------------------------------|
| 1           | Cellular_org | 'Nostoc azollae' 0708                     |
| 1           | Cellular_org | 'Rehmannia glutinosa' phytoplasma         |
| 1           | Cellular_org | Abiotrophia defectiva                     |
| 1           | Cellular_org | Abiotrophia defectiva ATCC 49176          |
| 1           | Cellular_org | Acaryochloris marina                      |
| 1           | Cellular_org | Acaryochloris marina MBIC11017            |
| 1           | Cellular_org | Acetivibrio cellulolyticus                |
| 1           | Cellular_org | Acetivibrio cellulolyticus CD2            |
| 1           | Cellular_org | Acetobacter aceti                         |
| 1           | Cellular_org | Acetobacter pasteurianus                  |
| 1           | Cellular_org | Acetobacter pasteurianus IFO 3283-01      |
| 1           | Cellular_org | Acetohalobium arabaticum DSM 5501         |
| 1           | Cellular_org | Acholeplasma laidlawii                    |
| 1           | Cellular_org | Acholeplasma laidlawii PG-8A              |
| 1           | Cellular_org | Achromobacter denitrificans               |
| 1           | Cellular_org | Achromobacter piechaudii                  |
| 1           | Cellular_org | Achromobacter piechaudii ATCC 43553       |
| 1           | Cellular_org | Achromobacter xylosoxidans                |
| 1           | Cellular_org | Achromobacter xylosoxidans A8             |
| 1           | Cellular_org | Acidaminococcus fermentans                |
| 1           | Cellular_org | Acidaminococcus fermentans DSM 20731      |
| 1           | Cellular_org | Acidaminococcus sp. D21                   |
| 1           | Cellular_org | Acidimicrobium ferrooxidans DSM 10331     |
| 1           | Cellular_org | Acidiphilium cryptum                      |
| 1           | Cellular_org | Acidiphilium cryptum JF-5                 |
| 1           | Cellular_org | Acidiphilium multivorum                   |
| 1           | Cellular_org | Acidithiobacillus caldus                  |
| 1           | Cellular_org | Acidithiobacillus caldus ATCC 51756       |
| 1           | Cellular_org | Acidithiobacillus ferrooxidans            |
| 1           | Cellular_org | Acidithiobacillus ferrooxidans ATCC 23270 |
| 1           | Cellular_org | Acidithiobacillus ferrooxidans ATCC 53993 |
| 1           | Cellular_org | Acidobacterium capsulatum                 |
| 1           | Cellular_org | Acidobacterium capsulatum ATCC 51196      |
| 1           | Cellular_org | Acidobacterium sp. MP5ACTX8               |
| 1           | Cellular_org | Acidobacterium sp. MP5ACTX9               |
| 1           | Cellular_org | Acidothermus cellulolyticus               |
| 1           | Cellular_org | Acidothermus cellulolyticus 11B           |
| 1           | Cellular_org | Acidovorax citrulli                       |
| 1           | Cellular_org | Acidovorax citrulli AAC00-1               |
| 1           | Cellular_org | Acidovorax delafieldii                    |
| 1           | Cellular_org | Acidovorax delafieldii 2AN                |

|   |              |                                                     |
|---|--------------|-----------------------------------------------------|
| 1 | Cellular_org | Acidovorax ebreus TPSY                              |
| 1 | Cellular_org | Acidovorax sp. JS42                                 |
| 1 | Cellular_org | Acinetobacter baumannii                             |
| 1 | Cellular_org | Acinetobacter baumannii AB0057                      |
| 1 | Cellular_org | Acinetobacter baumannii AB056                       |
| 1 | Cellular_org | Acinetobacter baumannii AB058                       |
| 1 | Cellular_org | Acinetobacter baumannii AB059                       |
| 1 | Cellular_org | Acinetobacter baumannii AB307-0294                  |
| 1 | Cellular_org | Acinetobacter baumannii AB900                       |
| 1 | Cellular_org | Acinetobacter baumannii ACICU                       |
| 1 | Cellular_org | Acinetobacter baumannii ATCC 17978                  |
| 1 | Cellular_org | Acinetobacter baumannii ATCC 19606                  |
| 1 | Cellular_org | Acinetobacter baumannii AYE                         |
| 1 | Cellular_org | Acinetobacter baumannii SDF                         |
| 1 | Cellular_org | Acinetobacter calcoaceticus                         |
| 1 | Cellular_org | Acinetobacter calcoaceticus RUH2202                 |
| 1 | Cellular_org | Acinetobacter genomosp. 13TU                        |
| 1 | Cellular_org | Acinetobacter genomosp. 3                           |
| 1 | Cellular_org | Acinetobacter haemolyticus                          |
| 1 | Cellular_org | Acinetobacter haemolyticus ATCC 19194               |
| 1 | Cellular_org | Acinetobacter johnsonii                             |
| 1 | Cellular_org | Acinetobacter johnsonii SH046                       |
| 1 | Cellular_org | Acinetobacter junii                                 |
| 1 | Cellular_org | Acinetobacter junii SH205                           |
| 1 | Cellular_org | Acinetobacter lwoffii                               |
| 1 | Cellular_org | Acinetobacter lwoffii SH145                         |
| 1 | Cellular_org | Acinetobacter radioresistens                        |
| 1 | Cellular_org | Acinetobacter radioresistens SH164                  |
| 1 | Cellular_org | Acinetobacter radioresistens SK82                   |
| 1 | Cellular_org | Acinetobacter sp. ADP1                              |
| 1 | Cellular_org | Acinetobacter sp. ATCC 27244                        |
| 1 | Cellular_org | Acinetobacter sp. DR1                               |
| 1 | Cellular_org | Acinetobacter sp. EB104                             |
| 1 | Cellular_org | Acinetobacter sp. RUH2624                           |
| 1 | Cellular_org | Acinetobacter sp. SH024                             |
| 1 | Cellular_org | Acinetobacter sp. SUN                               |
| 1 | Cellular_org | Acinetobacter venetianus                            |
| 1 | Cellular_org | Actinobacillus minor                                |
| 1 | Cellular_org | Actinobacillus minor 202                            |
| 1 | Cellular_org | Actinobacillus minor NM305                          |
| 1 | Cellular_org | Actinobacillus pleuropneumoniae                     |
| 1 | Cellular_org | Actinobacillus pleuropneumoniae serovar 1           |
| 1 | Cellular_org | Actinobacillus pleuropneumoniae serovar 1 str. 4074 |

|   |              |                                                                |
|---|--------------|----------------------------------------------------------------|
| 1 | Cellular_org | <i>Actinobacillus pleuropneumoniae</i> serovar 10 str. D13039  |
| 1 | Cellular_org | <i>Actinobacillus pleuropneumoniae</i> serovar 11 str. 56153   |
| 1 | Cellular_org | <i>Actinobacillus pleuropneumoniae</i> serovar 12 str. 1096    |
| 1 | Cellular_org | <i>Actinobacillus pleuropneumoniae</i> serovar 13 str. N273    |
| 1 | Cellular_org | <i>Actinobacillus pleuropneumoniae</i> serovar 2               |
| 1 | Cellular_org | <i>Actinobacillus pleuropneumoniae</i> serovar 2 str. 4226     |
| 1 | Cellular_org | <i>Actinobacillus pleuropneumoniae</i> serovar 2 str. S1536    |
| 1 | Cellular_org | <i>Actinobacillus pleuropneumoniae</i> serovar 3 str. JL03     |
| 1 | Cellular_org | <i>Actinobacillus pleuropneumoniae</i> serovar 4 str. M62      |
| 1 | Cellular_org | <i>Actinobacillus pleuropneumoniae</i> serovar 5               |
| 1 | Cellular_org | <i>Actinobacillus pleuropneumoniae</i> serovar 6 str. Femo     |
| 1 | Cellular_org | <i>Actinobacillus pleuropneumoniae</i> serovar 7 str. AP76     |
| 1 | Cellular_org | <i>Actinobacillus pleuropneumoniae</i> serovar 9 str. CVJ13261 |
| 1 | Cellular_org | <i>Actinobacillus porcitisillarum</i>                          |
| 1 | Cellular_org | <i>Actinobacillus succinogenes</i>                             |
| 1 | Cellular_org | <i>Actinobacillus succinogenes</i> 130Z                        |
| 1 | Cellular_org | <i>Actinobacillus ureae</i>                                    |
| 1 | Cellular_org | <i>Actinomyces coleocanis</i> DSM 15436                        |
| 1 | Cellular_org | <i>Actinomyces odontolyticus</i>                               |
| 1 | Cellular_org | <i>Actinomyces odontolyticus</i> ATCC 17982                    |
| 1 | Cellular_org | <i>Actinomyces odontolyticus</i> F0309                         |
| 1 | Cellular_org | <i>Actinomyces</i> sp. oral taxon 848 str. F0332               |
| 1 | Cellular_org | <i>Actinomyces urogenitalis</i> DSM 15434                      |
| 1 | Cellular_org | <i>Actinomyces viscosus</i>                                    |
| 1 | Cellular_org | <i>Actinomyces viscosus</i> C505                               |
| 1 | Cellular_org | <i>Actinosynnema mirum</i>                                     |
| 1 | Cellular_org | <i>Actinosynnema mirum</i> DSM 43827                           |
| 1 | Cellular_org | <i>Aerococcus viridans</i>                                     |
| 1 | Cellular_org | <i>Aerococcus viridans</i> ATCC 11563                          |
| 1 | Cellular_org | <i>Aeromicrobium marinum</i> DSM 15272                         |
| 1 | Cellular_org | <i>Aeromonas bestiarum</i>                                     |
| 1 | Cellular_org | <i>Aeromonas caviae</i>                                        |
| 1 | Cellular_org | <i>Aeromonas hydrophila</i>                                    |
| 1 | Cellular_org | <i>Aeromonas hydrophila</i> subsp. <i>hydrophila</i>           |
| 1 | Cellular_org | <i>Aeromonas hydrophila</i> subsp. <i>hydrophila</i> ATCC 7966 |
| 1 | Cellular_org | <i>Aeromonas salmonicida</i>                                   |
| 1 | Cellular_org | <i>Aeromonas salmonicida</i> subsp. <i>salmonicida</i>         |
| 1 | Cellular_org | <i>Aeromonas salmonicida</i> subsp. <i>salmonicida</i> A449    |
| 1 | Cellular_org | <i>Afipia</i> sp. 1NLS2                                        |
| 1 | Cellular_org | <i>Aggregatibacter actinomycetemcomitans</i>                   |
| 1 | Cellular_org | <i>Aggregatibacter actinomycetemcomitans</i> D11S-1            |
| 1 | Cellular_org | <i>Aggregatibacter actinomycetemcomitans</i> D7S-1             |
| 1 | Cellular_org | <i>Aggregatibacter aphrophilus</i>                             |

|   |              |                                                               |
|---|--------------|---------------------------------------------------------------|
| 1 | Cellular_org | Aggregatibacter aphrophilus NJ8700                            |
| 1 | Cellular_org | Aggregatibacter segnis                                        |
| 1 | Cellular_org | Agrobacterium radiobacter K84                                 |
| 1 | Cellular_org | Agrobacterium rhizogenes                                      |
| 1 | Cellular_org | Agrobacterium tumefaciens                                     |
| 1 | Cellular_org | Agrobacterium tumefaciens str. C58                            |
| 1 | Cellular_org | Agrobacterium vitis                                           |
| 1 | Cellular_org | Agrobacterium vitis S4                                        |
| 1 | Cellular_org | Ahrensia sp. R2A130                                           |
| 1 | Cellular_org | Akkermansia muciniphila                                       |
| 1 | Cellular_org | Akkermansia muciniphila ATCC BAA-835                          |
| 1 | Cellular_org | Alcanivorax borkumensis                                       |
| 1 | Cellular_org | Alcanivorax borkumensis SK2                                   |
| 1 | Cellular_org | Alcanivorax sp. DG881                                         |
| 1 | Cellular_org | Algoriphagus sp. PR1                                          |
| 1 | Cellular_org | Alicyclophilus denitrificans BC                               |
| 1 | Cellular_org | Alicyclobacillus acidocaldarius                               |
| 1 | Cellular_org | Alicyclobacillus acidocaldarius LAA1                          |
| 1 | Cellular_org | Alicyclobacillus acidocaldarius subsp. acidocaldarius         |
| 1 | Cellular_org | Alicyclobacillus acidocaldarius subsp. acidocaldarius DSM 446 |
| 1 | Cellular_org | Aliivibrio fischeri                                           |
| 1 | Cellular_org | Aliivibrio salmonicida                                        |
| 1 | Cellular_org | Aliivibrio salmonicida LFI1238                                |
| 1 | Cellular_org | Alistipes putredinis                                          |
| 1 | Cellular_org | Alistipes putredinis DSM 17216                                |
| 1 | Cellular_org | Alkalilimnicola ehrlichii MLHE-1                              |
| 1 | Cellular_org | Alkaliphilus metalliredigens QYMF                             |
| 1 | Cellular_org | Alkaliphilus oremlandii OhLAs                                 |
| 1 | Cellular_org | Allochromatium vinosum                                        |
| 1 | Cellular_org | Allochromatium vinosum DSM 180                                |
| 1 | Cellular_org | Alteromonadales bacterium TW-7                                |
| 1 | Cellular_org | Alteromonas                                                   |
| 1 | Cellular_org | Alteromonas macleodii                                         |
| 1 | Cellular_org | Alteromonas macleodii 'Deep ecotype'                          |
| 1 | Cellular_org | Alteromonas macleodii ATCC 27126                              |
| 1 | Cellular_org | Aminobacterium colombiense DSM 12261                          |
| 1 | Cellular_org | Aminomonas paucivorans DSM 12260                              |
| 1 | Cellular_org | Ammonifex degensii KC4                                        |
| 1 | Cellular_org | Amycolatopsis benzoatilytica                                  |
| 1 | Cellular_org | Amycolatopsis mediterranei                                    |
| 1 | Cellular_org | Amycolatopsis mediterranei U32                                |
| 1 | Cellular_org | Anabaena                                                      |

|   |              |                                              |
|---|--------------|----------------------------------------------|
| 1 | Cellular_org | Anabaena azollae                             |
| 1 | Cellular_org | Anabaena variabilis                          |
| 1 | Cellular_org | Anabaena variabilis ATCC 29413               |
| 1 | Cellular_org | Anaerobaculum hydrogeniformans ATCC BAA-1850 |
| 1 | Cellular_org | Anaerococcus hydrogenalis DSM 7454           |
| 1 | Cellular_org | Anaerococcus lactolyticus                    |
| 1 | Cellular_org | Anaerococcus lactolyticus ATCC 51172         |
| 1 | Cellular_org | Anaerococcus prevotii                        |
| 1 | Cellular_org | Anaerococcus prevotii DSM 20548              |
| 1 | Cellular_org | Anaerococcus tetradius ATCC 35098            |
| 1 | Cellular_org | Anaerococcus vaginalis ATCC 51170            |
| 1 | Cellular_org | Anaerofustis stercorihominis DSM 17244       |
| 1 | Cellular_org | Anaeromyxobacter dehalogenans                |
| 1 | Cellular_org | Anaeromyxobacter dehalogenans 2CP-1          |
| 1 | Cellular_org | Anaeromyxobacter dehalogenans 2CP-C          |
| 1 | Cellular_org | Anaeromyxobacter sp. Fw109-5                 |
| 1 | Cellular_org | Anaeromyxobacter sp. K                       |
| 1 | Cellular_org | Anaerostipes caccae                          |
| 1 | Cellular_org | Anaerostipes caccae DSM 14662                |
| 1 | Cellular_org | Anaerotruncus colihominis DSM 17241          |
| 1 | Cellular_org | Anaplasma centrale                           |
| 1 | Cellular_org | Anaplasma centrale str. Israel               |
| 1 | Cellular_org | Anaplasma marginale                          |
| 1 | Cellular_org | Anaplasma marginale str. Florida             |
| 1 | Cellular_org | Anaplasma marginale str. Mississippi         |
| 1 | Cellular_org | Anaplasma marginale str. Puerto Rico         |
| 1 | Cellular_org | Anaplasma marginale str. St. Maries          |
| 1 | Cellular_org | Anaplasma marginale str. Virginia            |
| 1 | Cellular_org | Anaplasma phagocytophilum HZ                 |
| 1 | Cellular_org | Anoxybacillus flavithermus                   |
| 1 | Cellular_org | Anoxybacillus flavithermus WK1               |
| 1 | Cellular_org | Aquifex aeolicus                             |
| 1 | Cellular_org | Aquifex aeolicus VF5                         |
| 1 | Cellular_org | Arcanobacterium haemolyticum                 |
| 1 | Cellular_org | Arcanobacterium haemolyticum DSM 20595       |
| 1 | Cellular_org | Arcanobacterium pyogenes                     |
| 1 | Cellular_org | Arcobacter butzleri                          |
| 1 | Cellular_org | Arcobacter butzleri RM4018                   |
| 1 | Cellular_org | Arcobacter nitrofigilis                      |
| 1 | Cellular_org | Arcobacter nitrofigilis DSM 7299             |
| 1 | Cellular_org | Aromatoleum aromaticum EbN1                  |
| 1 | Cellular_org | Arthrobacter arilaitensis                    |
| 1 | Cellular_org | Arthrobacter arilaitensis Re117              |



|   |              |                                                |
|---|--------------|------------------------------------------------|
| 1 | Cellular_org | <i>Arthrobacter aurescens</i>                  |
| 1 | Cellular_org | <i>Arthrobacter aurescens</i> TC1              |
| 1 | Cellular_org | <i>Arthrobacter chlorophenolicus</i>           |
| 1 | Cellular_org | <i>Arthrobacter chlorophenolicus</i> A6        |
| 1 | Cellular_org | <i>Arthrobacter nitroguajacolicus</i>          |
| 1 | Cellular_org | <i>Arthrobacter</i> sp. AK-1                   |
| 1 | Cellular_org | <i>Arthrobacter</i> sp. Chr15                  |
| 1 | Cellular_org | <i>Arthrobacter</i> sp. FB24                   |
| 1 | Cellular_org | <i>Arthrospira maxima</i>                      |
| 1 | Cellular_org | <i>Arthrospira maxima</i> CS-328               |
| 1 | Cellular_org | <i>Arthrospira platensis</i>                   |
| 1 | Cellular_org | <i>Arthrospira platensis</i> str. Paraca       |
| 1 | Cellular_org | Aster yellows phytoplasma                      |
| 1 | Cellular_org | Aster yellows witches'-broom phytoplasma       |
| 1 | Cellular_org | Aster yellows witches'-broom phytoplasma AYWB  |
| 1 | Cellular_org | <i>Asticcacaulis excentricus</i> CB 48         |
| 1 | Cellular_org | <i>Atopobium parvulum</i> DSM 20469            |
| 1 | Cellular_org | <i>Atopobium rimae</i> ATCC 49626              |
| 1 | Cellular_org | <i>Atopobium vaginae</i>                       |
| 1 | Cellular_org | <i>Atopobium vaginae</i> DSM 15829             |
| 1 | Cellular_org | <i>Atopobium vaginae</i> PB189-T1-4            |
| 1 | Cellular_org | <i>Aurantimonas manganoxydans</i> SI85-9A1     |
| 1 | Cellular_org | <i>Avibacterium paragallinarum</i>             |
| 1 | Cellular_org | <i>Azoarcus</i> sp. BH72                       |
| 1 | Cellular_org | <i>Azorhizobium caulinodans</i>                |
| 1 | Cellular_org | <i>Azorhizobium caulinodans</i> ORS 571        |
| 1 | Cellular_org | <i>Azospirillum</i> sp. B510                   |
| 1 | Cellular_org | <i>Azotobacter vinelandii</i>                  |
| 1 | Cellular_org | <i>Azotobacter vinelandii</i> DJ               |
| 1 | Cellular_org | <i>Bacillus amyloliquefaciens</i>              |
| 1 | Cellular_org | <i>Bacillus amyloliquefaciens</i> FZB42        |
| 1 | Cellular_org | <i>Bacillus anthracis</i> Tsiankovskii-I       |
| 1 | Cellular_org | <i>Bacillus anthracis</i> str. 'Ames Ancestor' |
| 1 | Cellular_org | <i>Bacillus anthracis</i> str. A0174           |
| 1 | Cellular_org | <i>Bacillus anthracis</i> str. A0193           |
| 1 | Cellular_org | <i>Bacillus anthracis</i> str. A0248           |
| 1 | Cellular_org | <i>Bacillus anthracis</i> str. A0389           |
| 1 | Cellular_org | <i>Bacillus anthracis</i> str. A0442           |
| 1 | Cellular_org | <i>Bacillus anthracis</i> str. A0465           |
| 1 | Cellular_org | <i>Bacillus anthracis</i> str. A0488           |
| 1 | Cellular_org | <i>Bacillus anthracis</i> str. A1055           |
| 1 | Cellular_org | <i>Bacillus anthracis</i> str. A2012           |
| 1 | Cellular_org | <i>Bacillus anthracis</i> str. Ames            |

|   |              |                                                       |
|---|--------------|-------------------------------------------------------|
| 1 | Cellular_org | Bacillus anthracis str. Australia 94                  |
| 1 | Cellular_org | Bacillus anthracis str. CDC 684                       |
| 1 | Cellular_org | Bacillus anthracis str. CNEVA-9066                    |
| 1 | Cellular_org | Bacillus anthracis str. Kruger B                      |
| 1 | Cellular_org | Bacillus anthracis str. Sterne                        |
| 1 | Cellular_org | Bacillus anthracis str. Vollum                        |
| 1 | Cellular_org | Bacillus anthracis str. Western North America USA6153 |
| 1 | Cellular_org | Bacillus atrophaeus                                   |
| 1 | Cellular_org | Bacillus cellulosilyticus DSM 2522                    |
| 1 | Cellular_org | Bacillus cereus                                       |
| 1 | Cellular_org | Bacillus cereus 03BB102                               |
| 1 | Cellular_org | Bacillus cereus 03BB108                               |
| 1 | Cellular_org | Bacillus cereus 172560W                               |
| 1 | Cellular_org | Bacillus cereus 95/8201                               |
| 1 | Cellular_org | Bacillus cereus AH1134                                |
| 1 | Cellular_org | Bacillus cereus AH1271                                |
| 1 | Cellular_org | Bacillus cereus AH1272                                |
| 1 | Cellular_org | Bacillus cereus AH1273                                |
| 1 | Cellular_org | Bacillus cereus AH187                                 |
| 1 | Cellular_org | Bacillus cereus AH603                                 |
| 1 | Cellular_org | Bacillus cereus AH621                                 |
| 1 | Cellular_org | Bacillus cereus AH676                                 |
| 1 | Cellular_org | Bacillus cereus AH820                                 |
| 1 | Cellular_org | Bacillus cereus ATCC 10876                            |
| 1 | Cellular_org | Bacillus cereus ATCC 10987                            |
| 1 | Cellular_org | Bacillus cereus ATCC 14579                            |
| 1 | Cellular_org | Bacillus cereus ATCC 4342                             |
| 1 | Cellular_org | Bacillus cereus B4264                                 |
| 1 | Cellular_org | Bacillus cereus BDRD-Cer4                             |
| 1 | Cellular_org | Bacillus cereus BDRD-ST196                            |
| 1 | Cellular_org | Bacillus cereus BDRD-ST24                             |
| 1 | Cellular_org | Bacillus cereus BDRD-ST26                             |
| 1 | Cellular_org | Bacillus cereus BGSC 6E1                              |
| 1 | Cellular_org | Bacillus cereus E33L                                  |
| 1 | Cellular_org | Bacillus cereus F65185                                |
| 1 | Cellular_org | Bacillus cereus G9241                                 |
| 1 | Cellular_org | Bacillus cereus G9842                                 |
| 1 | Cellular_org | Bacillus cereus H3081.97                              |
| 1 | Cellular_org | Bacillus cereus MM3                                   |
| 1 | Cellular_org | Bacillus cereus NVH0597-99                            |
| 1 | Cellular_org | Bacillus cereus Q1                                    |
| 1 | Cellular_org | Bacillus cereus R309803                               |
| 1 | Cellular_org | Bacillus cereus Rock1-15                              |

|   |              |                                          |
|---|--------------|------------------------------------------|
| 1 | Cellular_org | Bacillus cereus Rock1-3                  |
| 1 | Cellular_org | Bacillus cereus Rock3-28                 |
| 1 | Cellular_org | Bacillus cereus Rock3-29                 |
| 1 | Cellular_org | Bacillus cereus Rock3-42                 |
| 1 | Cellular_org | Bacillus cereus Rock3-44                 |
| 1 | Cellular_org | Bacillus cereus Rock4-18                 |
| 1 | Cellular_org | Bacillus cereus Rock4-2                  |
| 1 | Cellular_org | Bacillus cereus SJ1                      |
| 1 | Cellular_org | Bacillus cereus W                        |
| 1 | Cellular_org | Bacillus cereus biovar anthracis str. CI |
| 1 | Cellular_org | Bacillus cereus m1293                    |
| 1 | Cellular_org | Bacillus cereus m1550                    |
| 1 | Cellular_org | Bacillus clausii                         |
| 1 | Cellular_org | Bacillus clausii KSM-K16                 |
| 1 | Cellular_org | Bacillus coagulans                       |
| 1 | Cellular_org | Bacillus coagulans 36D1                  |
| 1 | Cellular_org | Bacillus coahuilensis                    |
| 1 | Cellular_org | Bacillus coahuilensis m4-4               |
| 1 | Cellular_org | Bacillus cytotoxicus                     |
| 1 | Cellular_org | Bacillus cytotoxicus NVH 391-98          |
| 1 | Cellular_org | Bacillus halodurans                      |
| 1 | Cellular_org | Bacillus halodurans C-125                |
| 1 | Cellular_org | Bacillus licheniformis                   |
| 1 | Cellular_org | Bacillus licheniformis ATCC 14580        |
| 1 | Cellular_org | Bacillus megaterium                      |
| 1 | Cellular_org | Bacillus megaterium DSM 319              |
| 1 | Cellular_org | Bacillus megaterium QM B1551             |
| 1 | Cellular_org | Bacillus methanolicus                    |
| 1 | Cellular_org | Bacillus methanolicus MGA3               |
| 1 | Cellular_org | Bacillus mycoides                        |
| 1 | Cellular_org | Bacillus mycoides DSM 2048               |
| 1 | Cellular_org | Bacillus mycoides Rock1-4                |
| 1 | Cellular_org | Bacillus mycoides Rock3-17               |
| 1 | Cellular_org | Bacillus pseudofirmus                    |
| 1 | Cellular_org | Bacillus pseudofirmus OF4                |
| 1 | Cellular_org | Bacillus pseudomycooides                 |
| 1 | Cellular_org | Bacillus pseudomycooides DSM 12442       |
| 1 | Cellular_org | Bacillus pumilus                         |
| 1 | Cellular_org | Bacillus pumilus ATCC 7061               |
| 1 | Cellular_org | Bacillus pumilus SAFR-032                |
| 1 | Cellular_org | Bacillus selenitireducens MLS10          |
| 1 | Cellular_org | Bacillus sp. B-3                         |
| 1 | Cellular_org | Bacillus sp. B14905                      |

|   |              |                                                          |
|---|--------------|----------------------------------------------------------|
| 1 | Cellular_org | Bacillus sp. BS-01                                       |
| 1 | Cellular_org | Bacillus sp. BS-02                                       |
| 1 | Cellular_org | Bacillus sp. JAMB750                                     |
| 1 | Cellular_org | Bacillus sp. NRRL B-14911                                |
| 1 | Cellular_org | Bacillus sp. SG-1                                        |
| 1 | Cellular_org | Bacillus subtilis                                        |
| 1 | Cellular_org | Bacillus subtilis subsp. natto                           |
| 1 | Cellular_org | Bacillus subtilis subsp. spizizenii                      |
| 1 | Cellular_org | Bacillus subtilis subsp. spizizenii ATCC 6633            |
| 1 | Cellular_org | Bacillus subtilis subsp. spizizenii str. W23             |
| 1 | Cellular_org | Bacillus subtilis subsp. subtilis                        |
| 1 | Cellular_org | Bacillus subtilis subsp. subtilis str. 168               |
| 1 | Cellular_org | Bacillus subtilis subsp. subtilis str. JH642             |
| 1 | Cellular_org | Bacillus subtilis subsp. subtilis str. NCIB 3610         |
| 1 | Cellular_org | Bacillus subtilis subsp. subtilis str. SMY               |
| 1 | Cellular_org | Bacillus thuringiensis                                   |
| 1 | Cellular_org | Bacillus thuringiensis BMB171                            |
| 1 | Cellular_org | Bacillus thuringiensis Bt407                             |
| 1 | Cellular_org | Bacillus thuringiensis IBL 200                           |
| 1 | Cellular_org | Bacillus thuringiensis IBL 4222                          |
| 1 | Cellular_org | Bacillus thuringiensis serovar andalousiensis            |
| 1 | Cellular_org | Bacillus thuringiensis serovar andalousiensis BGSC 4AW1  |
| 1 | Cellular_org | Bacillus thuringiensis serovar berliner                  |
| 1 | Cellular_org | Bacillus thuringiensis serovar berliner ATCC 10792       |
| 1 | Cellular_org | Bacillus thuringiensis serovar darmstadiensis            |
| 1 | Cellular_org | Bacillus thuringiensis serovar entomocidus               |
| 1 | Cellular_org | Bacillus thuringiensis serovar huazhongensis             |
| 1 | Cellular_org | Bacillus thuringiensis serovar huazhongensis BGSC 4BD1   |
| 1 | Cellular_org | Bacillus thuringiensis serovar israelensis               |
| 1 | Cellular_org | Bacillus thuringiensis serovar israelensis ATCC 35646    |
| 1 | Cellular_org | Bacillus thuringiensis serovar konkukian                 |
| 1 | Cellular_org | Bacillus thuringiensis serovar konkukian str. 97-27      |
| 1 | Cellular_org | Bacillus thuringiensis serovar kurstaki                  |
| 1 | Cellular_org | Bacillus thuringiensis serovar kurstaki str. T03a001     |
| 1 | Cellular_org | Bacillus thuringiensis serovar kurstaki str. YBT-1520    |
| 1 | Cellular_org | Bacillus thuringiensis serovar monterrey                 |
| 1 | Cellular_org | Bacillus thuringiensis serovar monterrey BGSC 4AJ1       |
| 1 | Cellular_org | Bacillus thuringiensis serovar pakistani                 |
| 1 | Cellular_org | Bacillus thuringiensis serovar pakistani str. T13001     |
| 1 | Cellular_org | Bacillus thuringiensis serovar pondicheriensis           |
| 1 | Cellular_org | Bacillus thuringiensis serovar pondicheriensis BGSC 4BA1 |
| 1 | Cellular_org | Bacillus thuringiensis serovar pulsiensis                |
| 1 | Cellular_org | Bacillus thuringiensis serovar pulsiensis BGSC 4CC1      |

|   |              |                                                          |
|---|--------------|----------------------------------------------------------|
| 1 | Cellular_org | Bacillus thuringiensis serovar sotto                     |
| 1 | Cellular_org | Bacillus thuringiensis serovar sotto str. T04001         |
| 1 | Cellular_org | Bacillus thuringiensis serovar tenebrionis               |
| 1 | Cellular_org | Bacillus thuringiensis serovar thuringiensis             |
| 1 | Cellular_org | Bacillus thuringiensis serovar thuringiensis str. T01001 |
| 1 | Cellular_org | Bacillus thuringiensis serovar tochiensis                |
| 1 | Cellular_org | Bacillus thuringiensis serovar tochiensis BGSC 4Y1       |
| 1 | Cellular_org | Bacillus thuringiensis str. Al Hakam                     |
| 1 | Cellular_org | Bacillus tusciae                                         |
| 1 | Cellular_org | Bacillus tusciae DSM 2912                                |
| 1 | Cellular_org | Bacillus weihenstephanensis                              |
| 1 | Cellular_org | Bacillus weihenstephanensis KBAB4                        |
| 1 | Cellular_org | Bacteroides caccae                                       |
| 1 | Cellular_org | Bacteroides caccae ATCC 43185                            |
| 1 | Cellular_org | Bacteroides capillosus ATCC 29799                        |
| 1 | Cellular_org | Bacteroides cellulosilyticus                             |
| 1 | Cellular_org | Bacteroides cellulosilyticus DSM 14838                   |
| 1 | Cellular_org | Bacteroides coprocola                                    |
| 1 | Cellular_org | Bacteroides coprocola DSM 17136                          |
| 1 | Cellular_org | Bacteroides coprophilus                                  |
| 1 | Cellular_org | Bacteroides coprophilus DSM 18228                        |
| 1 | Cellular_org | Bacteroides dorei 5_1_36/D4                              |
| 1 | Cellular_org | Bacteroides dorei DSM 17855                              |
| 1 | Cellular_org | Bacteroides eggerthii                                    |
| 1 | Cellular_org | Bacteroides eggerthii DSM 20697                          |
| 1 | Cellular_org | Bacteroides finegoldii DSM 17565                         |
| 1 | Cellular_org | Bacteroides fragilis                                     |
| 1 | Cellular_org | Bacteroides fragilis 3_1_12                              |
| 1 | Cellular_org | Bacteroides fragilis NCTC 9343                           |
| 1 | Cellular_org | Bacteroides fragilis YCH46                               |
| 1 | Cellular_org | Bacteroides helcogenes                                   |
| 1 | Cellular_org | Bacteroides helcogenes P 36-108                          |
| 1 | Cellular_org | Bacteroides intestinalis DSM 17393                       |
| 1 | Cellular_org | Bacteroides ovatus                                       |
| 1 | Cellular_org | Bacteroides ovatus ATCC 8483                             |
| 1 | Cellular_org | Bacteroides ovatus SD CC 2a                              |
| 1 | Cellular_org | Bacteroides ovatus SD CMC 3f                             |
| 1 | Cellular_org | Bacteroides pectinophilus ATCC 43243                     |
| 1 | Cellular_org | Bacteroides plebeius                                     |
| 1 | Cellular_org | Bacteroides plebeius DSM 17135                           |
| 1 | Cellular_org | Bacteroides sp. 1_1_14                                   |
| 1 | Cellular_org | Bacteroides sp. 1_1_6                                    |
| 1 | Cellular_org | Bacteroides sp. 20_3                                     |

|   |              |                                                           |
|---|--------------|-----------------------------------------------------------|
| 1 | Cellular_org | Bacteroides sp. 2_1_16                                    |
| 1 | Cellular_org | Bacteroides sp. 2_1_22                                    |
| 1 | Cellular_org | Bacteroides sp. 2_1_33B                                   |
| 1 | Cellular_org | Bacteroides sp. 2_1_7                                     |
| 1 | Cellular_org | Bacteroides sp. 2_2_4                                     |
| 1 | Cellular_org | Bacteroides sp. 3_1_19                                    |
| 1 | Cellular_org | Bacteroides sp. 3_1_23                                    |
| 1 | Cellular_org | Bacteroides sp. 3_1_33FAA                                 |
| 1 | Cellular_org | Bacteroides sp. 3_2_5                                     |
| 1 | Cellular_org | Bacteroides sp. 4_3_47FAA                                 |
| 1 | Cellular_org | Bacteroides sp. 9_1_42FAA                                 |
| 1 | Cellular_org | Bacteroides sp. D1                                        |
| 1 | Cellular_org | Bacteroides sp. D2                                        |
| 1 | Cellular_org | Bacteroides sp. D20                                       |
| 1 | Cellular_org | Bacteroides sp. D22                                       |
| 1 | Cellular_org | Bacteroides stercoris                                     |
| 1 | Cellular_org | Bacteroides stercoris ATCC 43183                          |
| 1 | Cellular_org | Bacteroides thetaiotaomicron                              |
| 1 | Cellular_org | Bacteroides thetaiotaomicron VPI-5482                     |
| 1 | Cellular_org | Bacteroides uniformis                                     |
| 1 | Cellular_org | Bacteroides uniformis ATCC 8492                           |
| 1 | Cellular_org | Bacteroides vulgatus                                      |
| 1 | Cellular_org | Bacteroides vulgatus ATCC 8482                            |
| 1 | Cellular_org | Bacteroides vulgatus PC510                                |
| 1 | Cellular_org | Bacteroides xylanisolvens                                 |
| 1 | Cellular_org | Bacteroides xylanisolvens SD CC 1b                        |
| 1 | Cellular_org | Bacteroidetes oral taxon 274 str. F0058                   |
| 1 | Cellular_org | Bartonella bacilliformis                                  |
| 1 | Cellular_org | Bartonella bacilliformis KC583                            |
| 1 | Cellular_org | Bartonella clarridgeiae                                   |
| 1 | Cellular_org | Bartonella grahamii                                       |
| 1 | Cellular_org | Bartonella grahamii as4aup                                |
| 1 | Cellular_org | Bartonella henselae                                       |
| 1 | Cellular_org | Bartonella henselae str. Houston-1                        |
| 1 | Cellular_org | Bartonella quintana                                       |
| 1 | Cellular_org | Bartonella quintana str. Toulouse                         |
| 1 | Cellular_org | Bartonella tribocorum                                     |
| 1 | Cellular_org | Bartonella tribocorum CIP 105476                          |
| 1 | Cellular_org | Baumannia cicadellinicola str. Hc (Homalodisca coagulata) |
| 1 | Cellular_org | Bdellovibrio bacteriovorus                                |
| 1 | Cellular_org | Bdellovibrio bacteriovorus HD100                          |
| 1 | Cellular_org | Beet leafhopper transmitted virescence phytoplasma        |
| 1 | Cellular_org | Beggiatoa sp. PS                                          |

|   |              |                                                   |
|---|--------------|---------------------------------------------------|
| 1 | Cellular_org | Beggiatoa sp. SS                                  |
| 1 | Cellular_org | Beijerinckia indica subsp. indica                 |
| 1 | Cellular_org | Beijerinckia indica subsp. indica ATCC 9039       |
| 1 | Cellular_org | Beutenbergia cavernae DSM 12333                   |
| 1 | Cellular_org | Bibersteinia trehalosi                            |
| 1 | Cellular_org | Bifidobacterium adolescentis                      |
| 1 | Cellular_org | Bifidobacterium adolescentis ATCC 15703           |
| 1 | Cellular_org | Bifidobacterium adolescentis L2-32                |
| 1 | Cellular_org | Bifidobacterium angulatum                         |
| 1 | Cellular_org | Bifidobacterium angulatum DSM 20098               |
| 1 | Cellular_org | Bifidobacterium animalis                          |
| 1 | Cellular_org | Bifidobacterium animalis subsp. lactis            |
| 1 | Cellular_org | Bifidobacterium animalis subsp. lactis AD011      |
| 1 | Cellular_org | Bifidobacterium animalis subsp. lactis BI-04      |
| 1 | Cellular_org | Bifidobacterium animalis subsp. lactis DSM 10140  |
| 1 | Cellular_org | Bifidobacterium animalis subsp. lactis HN019      |
| 1 | Cellular_org | Bifidobacterium asteroides                        |
| 1 | Cellular_org | Bifidobacterium bifidum                           |
| 1 | Cellular_org | Bifidobacterium bifidum NCIMB 41171               |
| 1 | Cellular_org | Bifidobacterium bifidum S17                       |
| 1 | Cellular_org | Bifidobacterium breve                             |
| 1 | Cellular_org | Bifidobacterium breve DSM 20213                   |
| 1 | Cellular_org | Bifidobacterium catenulatum                       |
| 1 | Cellular_org | Bifidobacterium catenulatum DSM 16992             |
| 1 | Cellular_org | Bifidobacterium dentium                           |
| 1 | Cellular_org | Bifidobacterium dentium ATCC 27678                |
| 1 | Cellular_org | Bifidobacterium dentium ATCC 27679                |
| 1 | Cellular_org | Bifidobacterium dentium Bd1                       |
| 1 | Cellular_org | Bifidobacterium dentium JCVIHMP022                |
| 1 | Cellular_org | Bifidobacterium gallicum                          |
| 1 | Cellular_org | Bifidobacterium gallicum DSM 20093                |
| 1 | Cellular_org | Bifidobacterium longum                            |
| 1 | Cellular_org | Bifidobacterium longum DJO10A                     |
| 1 | Cellular_org | Bifidobacterium longum NCC2705                    |
| 1 | Cellular_org | Bifidobacterium longum subsp. infantis            |
| 1 | Cellular_org | Bifidobacterium longum subsp. infantis ATCC 15697 |
| 1 | Cellular_org | Bifidobacterium longum subsp. infantis ATCC 55813 |
| 1 | Cellular_org | Bifidobacterium longum subsp. infantis CCUG 52486 |
| 1 | Cellular_org | Bifidobacterium longum subsp. longum              |
| 1 | Cellular_org | Bifidobacterium longum subsp. longum JCM 1217     |
| 1 | Cellular_org | Bifidobacterium longum subsp. longum JDM301       |
| 1 | Cellular_org | Bifidobacterium pseudocatenulatum                 |
| 1 | Cellular_org | Bifidobacterium pseudocatenulatum DSM 20438       |

|   |              |                                                                        |
|---|--------------|------------------------------------------------------------------------|
| 1 | Cellular_org | <i>Bifidobacterium pseudolongum</i>                                    |
| 1 | Cellular_org | <i>Bifidobacterium pseudolongum</i> subsp. <i>globosum</i>             |
| 1 | Cellular_org | <i>Bifidobacterium</i> sp. A24                                         |
| 1 | Cellular_org | <i>Bilophila wadsworthia</i>                                           |
| 1 | Cellular_org | <i>Blastopirellula marina</i> DSM 3645                                 |
| 1 | Cellular_org | <i>Blattabacterium</i> sp. ( <i>Blattella germanica</i> ) str. Bge     |
| 1 | Cellular_org | <i>Blattabacterium</i> sp. ( <i>Periplaneta americana</i> ) str. BPLAN |
| 1 | Cellular_org | <i>Blautia hansenii</i>                                                |
| 1 | Cellular_org | <i>Blautia hansenii</i> DSM 20583                                      |
| 1 | Cellular_org | <i>Blautia hydrogenotrophica</i> DSM 10507                             |
| 1 | Cellular_org | <i>Bordetella avium</i>                                                |
| 1 | Cellular_org | <i>Bordetella avium</i> 197N                                           |
| 1 | Cellular_org | <i>Bordetella bronchiseptica</i>                                       |
| 1 | Cellular_org | <i>Bordetella bronchiseptica</i> RB50                                  |
| 1 | Cellular_org | <i>Bordetella parapertussis</i>                                        |
| 1 | Cellular_org | <i>Bordetella parapertussis</i> 12822                                  |
| 1 | Cellular_org | <i>Bordetella pertussis</i>                                            |
| 1 | Cellular_org | <i>Bordetella pertussis</i> Tohama I                                   |
| 1 | Cellular_org | <i>Bordetella petrii</i>                                               |
| 1 | Cellular_org | <i>Bordetella petrii</i> DSM 12804                                     |
| 1 | Cellular_org | <i>Borrelia afzelii</i>                                                |
| 1 | Cellular_org | <i>Borrelia afzelii</i> ACA-1                                          |
| 1 | Cellular_org | <i>Borrelia afzelii</i> PKo                                            |
| 1 | Cellular_org | <i>Borrelia bavariensis</i>                                            |
| 1 | Cellular_org | <i>Borrelia burgdorferi</i> 118a                                       |
| 1 | Cellular_org | <i>Borrelia burgdorferi</i> 156a                                       |
| 1 | Cellular_org | <i>Borrelia burgdorferi</i> 29805                                      |
| 1 | Cellular_org | <i>Borrelia burgdorferi</i> 64b                                        |
| 1 | Cellular_org | <i>Borrelia burgdorferi</i> 72a                                        |
| 1 | Cellular_org | <i>Borrelia burgdorferi</i> 80a                                        |
| 1 | Cellular_org | <i>Borrelia burgdorferi</i> 94a                                        |
| 1 | Cellular_org | <i>Borrelia burgdorferi</i> B31                                        |
| 1 | Cellular_org | <i>Borrelia burgdorferi</i> Bol26                                      |
| 1 | Cellular_org | <i>Borrelia burgdorferi</i> WI91-23                                    |
| 1 | Cellular_org | <i>Borrelia burgdorferi</i> ZS7                                        |
| 1 | Cellular_org | <i>Borrelia duttonii</i>                                               |
| 1 | Cellular_org | <i>Borrelia duttonii</i> Ly                                            |
| 1 | Cellular_org | <i>Borrelia garinii</i>                                                |
| 1 | Cellular_org | <i>Borrelia garinii</i> Far04                                          |
| 1 | Cellular_org | <i>Borrelia garinii</i> PBi                                            |
| 1 | Cellular_org | <i>Borrelia garinii</i> PBr                                            |
| 1 | Cellular_org | <i>Borrelia hermsii</i>                                                |
| 1 | Cellular_org | <i>Borrelia hermsii</i> DAH                                            |



|   |              |                                               |
|---|--------------|-----------------------------------------------|
| 1 | Cellular_org | <i>Borrelia recurrentis</i>                   |
| 1 | Cellular_org | <i>Borrelia recurrentis</i> A1                |
| 1 | Cellular_org | <i>Borrelia</i> sp. SV1                       |
| 1 | Cellular_org | <i>Borrelia spielmanii</i>                    |
| 1 | Cellular_org | <i>Borrelia spielmanii</i> A14S               |
| 1 | Cellular_org | <i>Borrelia turicatae</i>                     |
| 1 | Cellular_org | <i>Borrelia turicatae</i> 91E135              |
| 1 | Cellular_org | <i>Borrelia valaisiana</i>                    |
| 1 | Cellular_org | <i>Borrelia valaisiana</i> VS116              |
| 1 | Cellular_org | <i>Brachybacterium faecium</i> DSM 4810       |
| 1 | Cellular_org | <i>Brachyospira hyodysenteriae</i>            |
| 1 | Cellular_org | <i>Brachyospira hyodysenteriae</i> WA1        |
| 1 | Cellular_org | <i>Brachyospira murdochii</i>                 |
| 1 | Cellular_org | <i>Brachyospira murdochii</i> DSM 12563       |
| 1 | Cellular_org | <i>Brachyospira pilosicoli</i>                |
| 1 | Cellular_org | <i>Brachyospira pilosicoli</i> 95/1000        |
| 1 | Cellular_org | <i>Bradyrhizobium japonicum</i>               |
| 1 | Cellular_org | <i>Bradyrhizobium japonicum</i> USDA 110      |
| 1 | Cellular_org | <i>Bradyrhizobium</i> sp. BTAi1               |
| 1 | Cellular_org | <i>Bradyrhizobium</i> sp. ORS278              |
| 1 | Cellular_org | <i>Brevibacillus borstelensis</i>             |
| 1 | Cellular_org | <i>Brevibacillus brevis</i>                   |
| 1 | Cellular_org | <i>Brevibacillus brevis</i> NBRC 100599       |
| 1 | Cellular_org | <i>Brevibacterium</i>                         |
| 1 | Cellular_org | <i>Brevibacterium linens</i>                  |
| 1 | Cellular_org | <i>Brevibacterium linens</i> BL2              |
| 1 | Cellular_org | <i>Brevibacterium mcbrellneri</i> ATCC 49030  |
| 1 | Cellular_org | <i>Brevundimonas</i> sp. BAL3                 |
| 1 | Cellular_org | <i>Brevundimonas subvibrioides</i>            |
| 1 | Cellular_org | <i>Brevundimonas subvibrioides</i> ATCC 15264 |
| 1 | Cellular_org | <i>Brucella abortus</i>                       |
| 1 | Cellular_org | <i>Brucella abortus</i> NCTC 8038             |
| 1 | Cellular_org | <i>Brucella abortus</i> S19                   |
| 1 | Cellular_org | <i>Brucella abortus</i> bv. 1                 |
| 1 | Cellular_org | <i>Brucella abortus</i> bv. 1 str. 9-941      |
| 1 | Cellular_org | <i>Brucella abortus</i> bv. 2 str. 86/8/59    |
| 1 | Cellular_org | <i>Brucella abortus</i> bv. 3                 |
| 1 | Cellular_org | <i>Brucella abortus</i> bv. 3 str. Tulya      |
| 1 | Cellular_org | <i>Brucella abortus</i> bv. 4 str. 292        |
| 1 | Cellular_org | <i>Brucella abortus</i> bv. 5 str. B3196      |
| 1 | Cellular_org | <i>Brucella abortus</i> bv. 6 str. 870        |
| 1 | Cellular_org | <i>Brucella abortus</i> bv. 9 str. C68        |
| 1 | Cellular_org | <i>Brucella abortus</i> str. 2308 A           |

|   |              |                                                                   |
|---|--------------|-------------------------------------------------------------------|
| 1 | Cellular_org | <i>Brucella canis</i>                                             |
| 1 | Cellular_org | <i>Brucella canis</i> ATCC 23365                                  |
| 1 | Cellular_org | <i>Brucella ceti</i>                                              |
| 1 | Cellular_org | <i>Brucella ceti</i> B1/94                                        |
| 1 | Cellular_org | <i>Brucella ceti</i> M13/05/1                                     |
| 1 | Cellular_org | <i>Brucella ceti</i> M490/95/1                                    |
| 1 | Cellular_org | <i>Brucella ceti</i> M644/93/1                                    |
| 1 | Cellular_org | <i>Brucella ceti</i> str. Cudo                                    |
| 1 | Cellular_org | <i>Brucella melitensis</i>                                        |
| 1 | Cellular_org | <i>Brucella melitensis</i> ATCC 23457                             |
| 1 | Cellular_org | <i>Brucella melitensis</i> biovar Abortus 2308                    |
| 1 | Cellular_org | <i>Brucella melitensis</i> bv. 1 str. 16M                         |
| 1 | Cellular_org | <i>Brucella melitensis</i> bv. 1 str. Rev.1                       |
| 1 | Cellular_org | <i>Brucella melitensis</i> bv. 2 str. 63/9                        |
| 1 | Cellular_org | <i>Brucella melitensis</i> bv. 3 str. Ether                       |
| 1 | Cellular_org | <i>Brucella microti</i>                                           |
| 1 | Cellular_org | <i>Brucella microti</i> CCM 4915                                  |
| 1 | Cellular_org | <i>Brucella neotomae</i>                                          |
| 1 | Cellular_org | <i>Brucella neotomae</i> 5K33                                     |
| 1 | Cellular_org | <i>Brucella ovis</i>                                              |
| 1 | Cellular_org | <i>Brucella ovis</i> ATCC 25840                                   |
| 1 | Cellular_org | <i>Brucella pinnipedialis</i>                                     |
| 1 | Cellular_org | <i>Brucella pinnipedialis</i> B2/94                               |
| 1 | Cellular_org | <i>Brucella pinnipedialis</i> M163/99/10                          |
| 1 | Cellular_org | <i>Brucella pinnipedialis</i> M292/94/1                           |
| 1 | Cellular_org | <i>Brucella</i> sp. 83/13                                         |
| 1 | Cellular_org | <i>Brucella</i> sp. BO1                                           |
| 1 | Cellular_org | <i>Brucella</i> sp. BO2                                           |
| 1 | Cellular_org | <i>Brucella</i> sp. F5/99                                         |
| 1 | Cellular_org | <i>Brucella</i> sp. NF 2653                                       |
| 1 | Cellular_org | <i>Brucella</i> sp. NVSL 07-0026                                  |
| 1 | Cellular_org | <i>Brucella suis</i>                                              |
| 1 | Cellular_org | <i>Brucella suis</i> 1330                                         |
| 1 | Cellular_org | <i>Brucella suis</i> ATCC 23445                                   |
| 1 | Cellular_org | <i>Brucella suis</i> bv. 3 str. 686                               |
| 1 | Cellular_org | <i>Brucella suis</i> bv. 4 str. 40                                |
| 1 | Cellular_org | <i>Brucella suis</i> bv. 5 str. 513                               |
| 1 | Cellular_org | <i>Buchnera aphidicola</i>                                        |
| 1 | Cellular_org | <i>Buchnera aphidicola</i> ( <i>Acyrtosiphon pisum</i> )          |
| 1 | Cellular_org | <i>Buchnera aphidicola</i> ( <i>Cinara cedri</i> )                |
| 1 | Cellular_org | <i>Buchnera aphidicola</i> ( <i>Schizaphis graminum</i> )         |
| 1 | Cellular_org | <i>Buchnera aphidicola</i> str. 5A ( <i>Acyrtosiphon pisum</i> )  |
| 1 | Cellular_org | <i>Buchnera aphidicola</i> str. APS ( <i>Acyrtosiphon pisum</i> ) |

|   |              |                                                    |
|---|--------------|----------------------------------------------------|
| 1 | Cellular_org | Buchnera aphidicola str. Bp (Baizongia pistaciae)  |
| 1 | Cellular_org | Buchnera aphidicola str. Cc (Cinara cedri)         |
| 1 | Cellular_org | Buchnera aphidicola str. LSR1 (Acyrtosiphon pisum) |
| 1 | Cellular_org | Buchnera aphidicola str. Sg (Schizaphis graminum)  |
| 1 | Cellular_org | Buchnera aphidicola str. Tuc7 (Acyrtosiphon pisum) |
| 1 | Cellular_org | Bulleidia extracta W1219                           |
| 1 | Cellular_org | Burkholderia ambifaria                             |
| 1 | Cellular_org | Burkholderia ambifaria AMMD                        |
| 1 | Cellular_org | Burkholderia ambifaria IOP40-10                    |
| 1 | Cellular_org | Burkholderia ambifaria MC40-6                      |
| 1 | Cellular_org | Burkholderia ambifaria MEX-5                       |
| 1 | Cellular_org | Burkholderia cenocepacia                           |
| 1 | Cellular_org | Burkholderia cenocepacia AU 1054                   |
| 1 | Cellular_org | Burkholderia cenocepacia HI2424                    |
| 1 | Cellular_org | Burkholderia cenocepacia J2315                     |
| 1 | Cellular_org | Burkholderia cenocepacia MCO-3                     |
| 1 | Cellular_org | Burkholderia cenocepacia PC184                     |
| 1 | Cellular_org | Burkholderia cepacia                               |
| 1 | Cellular_org | Burkholderia dolosa                                |
| 1 | Cellular_org | Burkholderia dolosa AUO158                         |
| 1 | Cellular_org | Burkholderia glumae                                |
| 1 | Cellular_org | Burkholderia glumae BGR1                           |
| 1 | Cellular_org | Burkholderia graminis                              |
| 1 | Cellular_org | Burkholderia graminis C4D1M                        |
| 1 | Cellular_org | Burkholderia mallei                                |
| 1 | Cellular_org | Burkholderia mallei 2002721280                     |
| 1 | Cellular_org | Burkholderia mallei ATCC 10399                     |
| 1 | Cellular_org | Burkholderia mallei ATCC 23344                     |
| 1 | Cellular_org | Burkholderia mallei FMH                            |
| 1 | Cellular_org | Burkholderia mallei GB8 horse 4                    |
| 1 | Cellular_org | Burkholderia mallei JHU                            |
| 1 | Cellular_org | Burkholderia mallei NCTC 10229                     |
| 1 | Cellular_org | Burkholderia mallei NCTC 10247                     |
| 1 | Cellular_org | Burkholderia mallei PRL-20                         |
| 1 | Cellular_org | Burkholderia mallei SAVP1                          |
| 1 | Cellular_org | Burkholderia multivorans                           |
| 1 | Cellular_org | Burkholderia multivorans ATCC 17616                |
| 1 | Cellular_org | Burkholderia multivorans CGD1                      |
| 1 | Cellular_org | Burkholderia multivorans CGD2                      |
| 1 | Cellular_org | Burkholderia multivorans CGD2M                     |
| 1 | Cellular_org | Burkholderia oklahomensis C6786                    |
| 1 | Cellular_org | Burkholderia oklahomensis EO147                    |
| 1 | Cellular_org | Burkholderia phymatum                              |

|   |              |                                         |
|---|--------------|-----------------------------------------|
| 1 | Cellular_org | Burkholderia phymatum STM815            |
| 1 | Cellular_org | Burkholderia phytofirmans               |
| 1 | Cellular_org | Burkholderia phytofirmans PsJN          |
| 1 | Cellular_org | Burkholderia pseudomallei               |
| 1 | Cellular_org | Burkholderia pseudomallei 1106a         |
| 1 | Cellular_org | Burkholderia pseudomallei 1106b         |
| 1 | Cellular_org | Burkholderia pseudomallei 112           |
| 1 | Cellular_org | Burkholderia pseudomallei 14            |
| 1 | Cellular_org | Burkholderia pseudomallei 1655          |
| 1 | Cellular_org | Burkholderia pseudomallei 1710a         |
| 1 | Cellular_org | Burkholderia pseudomallei 1710b         |
| 1 | Cellular_org | Burkholderia pseudomallei 305           |
| 1 | Cellular_org | Burkholderia pseudomallei 406e          |
| 1 | Cellular_org | Burkholderia pseudomallei 576           |
| 1 | Cellular_org | Burkholderia pseudomallei 668           |
| 1 | Cellular_org | Burkholderia pseudomallei 7894          |
| 1 | Cellular_org | Burkholderia pseudomallei 9             |
| 1 | Cellular_org | Burkholderia pseudomallei 91            |
| 1 | Cellular_org | Burkholderia pseudomallei B7210         |
| 1 | Cellular_org | Burkholderia pseudomallei BCC215        |
| 1 | Cellular_org | Burkholderia pseudomallei DM98          |
| 1 | Cellular_org | Burkholderia pseudomallei K96243        |
| 1 | Cellular_org | Burkholderia pseudomallei MSHR346       |
| 1 | Cellular_org | Burkholderia pseudomallei NCTC 13177    |
| 1 | Cellular_org | Burkholderia pseudomallei Pakistan 9    |
| 1 | Cellular_org | Burkholderia pseudomallei Pasteur 52237 |
| 1 | Cellular_org | Burkholderia pseudomallei S13           |
| 1 | Cellular_org | Burkholderia rhizoxinica                |
| 1 | Cellular_org | Burkholderia rhizoxinica HKI 454        |
| 1 | Cellular_org | Burkholderia sp. 383                    |
| 1 | Cellular_org | Burkholderia sp. CCGE1001               |
| 1 | Cellular_org | Burkholderia sp. CCGE1002               |
| 1 | Cellular_org | Burkholderia sp. CCGE1003               |
| 1 | Cellular_org | Burkholderia sp. Ch1-1                  |
| 1 | Cellular_org | Burkholderia sp. H160                   |
| 1 | Cellular_org | Burkholderia thailandensis              |
| 1 | Cellular_org | Burkholderia thailandensis Bt4          |
| 1 | Cellular_org | Burkholderia thailandensis E264         |
| 1 | Cellular_org | Burkholderia thailandensis MSMB43       |
| 1 | Cellular_org | Burkholderia thailandensis TXDOH        |
| 1 | Cellular_org | Burkholderia ubonensis                  |
| 1 | Cellular_org | Burkholderia ubonensis Bu               |
| 1 | Cellular_org | Burkholderia vietnamiensis              |

|   |              |                                                    |
|---|--------------|----------------------------------------------------|
| 1 | Cellular_org | Burkholderia vietnamiensis G4                      |
| 1 | Cellular_org | Burkholderia xenovorans                            |
| 1 | Cellular_org | Burkholderia xenovorans LB400                      |
| 1 | Cellular_org | Burkholderiales bacterium 1_1_47                   |
| 1 | Cellular_org | Butyrivibrio crossotus DSM 2876                    |
| 1 | Cellular_org | Butyrivibrio fibrisolvens                          |
| 1 | Cellular_org | Butyrivibrio fibrisolvens OB157                    |
| 1 | Cellular_org | Butyrivibrio proteoclasticus B316                  |
| 1 | Cellular_org | Caedibacter taeniospiralis                         |
| 1 | Cellular_org | Caldicellulosiruptor bescii DSM 6725               |
| 1 | Cellular_org | Caldicellulosiruptor lactoaceticus                 |
| 1 | Cellular_org | Caldicellulosiruptor obsidiansis OB47              |
| 1 | Cellular_org | Caldicellulosiruptor saccharolyticus               |
| 1 | Cellular_org | Caldicellulosiruptor saccharolyticus DSM 8903      |
| 1 | Cellular_org | Caminibacter mediatlanticus                        |
| 1 | Cellular_org | Caminibacter mediatlanticus TB-2                   |
| 1 | Cellular_org | Campylobacter coli                                 |
| 1 | Cellular_org | Campylobacter coli JV20                            |
| 1 | Cellular_org | Campylobacter coli RM2228                          |
| 1 | Cellular_org | Campylobacter concisus                             |
| 1 | Cellular_org | Campylobacter concisus 13826                       |
| 1 | Cellular_org | Campylobacter curvus                               |
| 1 | Cellular_org | Campylobacter curvus 525.92                        |
| 1 | Cellular_org | Campylobacter fetus                                |
| 1 | Cellular_org | Campylobacter fetus subsp. fetus                   |
| 1 | Cellular_org | Campylobacter fetus subsp. fetus 82-40             |
| 1 | Cellular_org | Campylobacter fetus subsp. venerealis              |
| 1 | Cellular_org | Campylobacter fetus subsp. venerealis str. Azul-94 |
| 1 | Cellular_org | Campylobacter gracilis                             |
| 1 | Cellular_org | Campylobacter gracilis RM3268                      |
| 1 | Cellular_org | Campylobacter hominis                              |
| 1 | Cellular_org | Campylobacter hominis ATCC BAA-381                 |
| 1 | Cellular_org | Campylobacter jejuni                               |
| 1 | Cellular_org | Campylobacter jejuni RM1221                        |
| 1 | Cellular_org | Campylobacter jejuni subsp. doylei                 |
| 1 | Cellular_org | Campylobacter jejuni subsp. doylei 269.97          |
| 1 | Cellular_org | Campylobacter jejuni subsp. jejuni                 |
| 1 | Cellular_org | Campylobacter jejuni subsp. jejuni 1336            |
| 1 | Cellular_org | Campylobacter jejuni subsp. jejuni 260.94          |
| 1 | Cellular_org | Campylobacter jejuni subsp. jejuni 414             |
| 1 | Cellular_org | Campylobacter jejuni subsp. jejuni 81-176          |
| 1 | Cellular_org | Campylobacter jejuni subsp. jejuni 81116           |
| 1 | Cellular_org | Campylobacter jejuni subsp. jejuni 84-25           |

|   |              |                                                               |
|---|--------------|---------------------------------------------------------------|
| 1 | Cellular_org | Campylobacter jejuni subsp. jejuni BH-01-0142                 |
| 1 | Cellular_org | Campylobacter jejuni subsp. jejuni CF93-6                     |
| 1 | Cellular_org | Campylobacter jejuni subsp. jejuni CG8421                     |
| 1 | Cellular_org | Campylobacter jejuni subsp. jejuni CG8486                     |
| 1 | Cellular_org | Campylobacter jejuni subsp. jejuni HB93-13                    |
| 1 | Cellular_org | Campylobacter jejuni subsp. jejuni NCTC 11168                 |
| 1 | Cellular_org | Campylobacter lari                                            |
| 1 | Cellular_org | Campylobacter lari RM2100                                     |
| 1 | Cellular_org | Campylobacter rectus                                          |
| 1 | Cellular_org | Campylobacter rectus RM3267                                   |
| 1 | Cellular_org | Campylobacter showae                                          |
| 1 | Cellular_org | Campylobacter showae RM3277                                   |
| 1 | Cellular_org | Campylobacter upsaliensis                                     |
| 1 | Cellular_org | Campylobacter upsaliensis RM3195                              |
| 1 | Cellular_org | Campylobacterales bacterium GD 1                              |
| 1 | Cellular_org | Candidatus Accumulibacter phosphatis clade IIA str. UW-1      |
| 1 | Cellular_org | Candidatus Amoebophilus asiaticus                             |
| 1 | Cellular_org | Candidatus Amoebophilus asiaticus 5a2                         |
| 1 | Cellular_org | Candidatus Azobacteroides pseudotrichonymphae genomovar. CFP2 |
| 1 | Cellular_org | Candidatus Baumannia cicadellinicola                          |
| 1 | Cellular_org | Candidatus Blochmannia floridanus                             |
| 1 | Cellular_org | Candidatus Blochmannia pennsylvanicus                         |
| 1 | Cellular_org | Candidatus Blochmannia pennsylvanicus str. BPEN               |
| 1 | Cellular_org | Candidatus Blochmannia vafer                                  |
| 1 | Cellular_org | Candidatus Carsonella ruddii                                  |
| 1 | Cellular_org | Candidatus Carsonella ruddii PV                               |
| 1 | Cellular_org | Candidatus Cloacamonas acidaminovorans                        |
| 1 | Cellular_org | Candidatus Desulforudis audaxviator MP104C                    |
| 1 | Cellular_org | Candidatus Hamiltonella defensa                               |
| 1 | Cellular_org | Candidatus Hamiltonella defensa 5AT (Acyrtosiphon pisum)      |
| 1 | Cellular_org | Candidatus Hodgkinia cicadicola Dsem                          |
| 1 | Cellular_org | Candidatus Koribacter versatilis Ellin345                     |
| 1 | Cellular_org | Candidatus Liberibacter asiaticus                             |
| 1 | Cellular_org | Candidatus Liberibacter asiaticus str. psy62                  |
| 1 | Cellular_org | Candidatus Liberibacter solanacearum                          |
| 1 | Cellular_org | Candidatus Nitrospira defluvii                                |
| 1 | Cellular_org | Candidatus Pelagibacter sp. HTCC7211                          |
| 1 | Cellular_org | Candidatus Pelagibacter ubique                                |
| 1 | Cellular_org | Candidatus Pelagibacter ubique HTCC1002                       |
| 1 | Cellular_org | Candidatus Pelagibacter ubique HTCC1062                       |
| 1 | Cellular_org | Candidatus Phytoplasma australiense                           |

|   |              |                                                              |
|---|--------------|--------------------------------------------------------------|
| 1 | Cellular_org | Candidatus Phytoplasma mali                                  |
| 1 | Cellular_org | Candidatus Poribacteria sp. WGA-A3                           |
| 1 | Cellular_org | Candidatus Protochlamydia amoebophila UWE25                  |
| 1 | Cellular_org | Candidatus Puniceispirillum marinum IMCC1322                 |
| 1 | Cellular_org | Candidatus Regiella insecticola                              |
| 1 | Cellular_org | Candidatus Regiella insecticola LSR1                         |
| 1 | Cellular_org | Candidatus Rickettsia amblyommii                             |
| 1 | Cellular_org | Candidatus Riesia pediculicola                               |
| 1 | Cellular_org | Candidatus Riesia pediculicola USDA                          |
| 1 | Cellular_org | Candidatus Ruthia magnifica str. Cm (Calyptogenia magnifica) |
| 1 | Cellular_org | Candidatus Solibacter usitatus Ellin6076                     |
| 1 | Cellular_org | Candidatus Sulcia muelleri CARI                              |
| 1 | Cellular_org | Candidatus Sulcia muelleri DMIN                              |
| 1 | Cellular_org | Candidatus Sulcia muelleri GWSS                              |
| 1 | Cellular_org | Candidatus Sulcia muelleri SMDSEM                            |
| 1 | Cellular_org | Candidatus Sulcia muelleri str. Hc (Homalodisca coagulata)   |
| 1 | Cellular_org | Candidatus Vesicomysocius okutanii HA                        |
| 1 | Cellular_org | Candidatus Zinderia insecticola CARI                         |
| 1 | Cellular_org | Capnocytophaga canimorsus                                    |
| 1 | Cellular_org | Capnocytophaga gingivalis                                    |
| 1 | Cellular_org | Capnocytophaga gingivalis ATCC 33624                         |
| 1 | Cellular_org | Capnocytophaga ochracea                                      |
| 1 | Cellular_org | Capnocytophaga ochracea DSM 7271                             |
| 1 | Cellular_org | Capnocytophaga sputigena                                     |
| 1 | Cellular_org | Carboxydibrachium pacificum DSM 12653                        |
| 1 | Cellular_org | Carboxydotherrnus hydrogenoformans                           |
| 1 | Cellular_org | Carboxydotherrnus hydrogenoformans Z-2901                    |
| 1 | Cellular_org | Cardiobacterium hominis ATCC 15826                           |
| 1 | Cellular_org | Carnobacterium sp. AT7                                       |
| 1 | Cellular_org | Catenibacterium mitsuokai DSM 15897                          |
| 1 | Cellular_org | Catenulispora acidiphila DSM 44928                           |
| 1 | Cellular_org | Catonella morbi ATCC 51271                                   |
| 1 | Cellular_org | Caulobacter crescentus CB15                                  |
| 1 | Cellular_org | Caulobacter crescentus NA1000                                |
| 1 | Cellular_org | Caulobacter segnis                                           |
| 1 | Cellular_org | Caulobacter segnis ATCC 21756                                |
| 1 | Cellular_org | Caulobacter sp. K31                                          |
| 1 | Cellular_org | Caulobacter vibrioides                                       |
| 1 | Cellular_org | Cellulomonas flavigena                                       |
| 1 | Cellular_org | Cellulomonas flavigena DSM 20109                             |
| 1 | Cellular_org | Cellvibrio japonicus                                         |

|   |              |                                           |
|---|--------------|-------------------------------------------|
| 1 | Cellular_org | Cellvibrio japonicus Ueda107              |
| 1 | Cellular_org | Chelativorans sp. BNC1                    |
| 1 | Cellular_org | Chitinophaga pinensis                     |
| 1 | Cellular_org | Chitinophaga pinensis DSM 2588            |
| 1 | Cellular_org | Chlamydia muridarum MopnTet14             |
| 1 | Cellular_org | Chlamydia muridarum Nigg                  |
| 1 | Cellular_org | Chlamydia muridarum Weiss                 |
| 1 | Cellular_org | Chlamydia trachomatis                     |
| 1 | Cellular_org | Chlamydia trachomatis 434/Bu              |
| 1 | Cellular_org | Chlamydia trachomatis 6276                |
| 1 | Cellular_org | Chlamydia trachomatis 6276s               |
| 1 | Cellular_org | Chlamydia trachomatis 70                  |
| 1 | Cellular_org | Chlamydia trachomatis 70s                 |
| 1 | Cellular_org | Chlamydia trachomatis A/HAR-13            |
| 1 | Cellular_org | Chlamydia trachomatis B/Jali20/OT         |
| 1 | Cellular_org | Chlamydia trachomatis B/TZ1A828/OT        |
| 1 | Cellular_org | Chlamydia trachomatis D(s)2923            |
| 1 | Cellular_org | Chlamydia trachomatis D/UW-3/CX           |
| 1 | Cellular_org | Chlamydia trachomatis L2b/UCH-1/proctitis |
| 1 | Cellular_org | Chlamydia trachomatis L2tet1              |
| 1 | Cellular_org | Chlamydophila abortus                     |
| 1 | Cellular_org | Chlamydophila abortus S26/3               |
| 1 | Cellular_org | Chlamydophila caviae                      |
| 1 | Cellular_org | Chlamydophila caviae GPIC                 |
| 1 | Cellular_org | Chlamydophila felis                       |
| 1 | Cellular_org | Chlamydophila felis Fe/C-56               |
| 1 | Cellular_org | Chlamydophila pneumoniae                  |
| 1 | Cellular_org | Chlamydophila pneumoniae AR39             |
| 1 | Cellular_org | Chlamydophila pneumoniae CWL029           |
| 1 | Cellular_org | Chlamydophila pneumoniae J138             |
| 1 | Cellular_org | Chlamydophila pneumoniae TW-183           |
| 1 | Cellular_org | Chlamydophila psittaci                    |
| 1 | Cellular_org | Chlorobaculum parvum                      |
| 1 | Cellular_org | Chlorobaculum parvum NCIB 8327            |
| 1 | Cellular_org | Chlorobaculum tepidum                     |
| 1 | Cellular_org | Chlorobium chlorochromatii CaD3           |
| 1 | Cellular_org | Chlorobium ferrooxidans DSM 13031         |
| 1 | Cellular_org | Chlorobium limicola                       |
| 1 | Cellular_org | Chlorobium limicola DSM 245               |
| 1 | Cellular_org | Chlorobium luteolum DSM 273               |
| 1 | Cellular_org | Chlorobium phaeobacteroides               |
| 1 | Cellular_org | Chlorobium phaeobacteroides BS1           |
| 1 | Cellular_org | Chlorobium phaeobacteroides DSM 266       |



|   |              |                                                          |
|---|--------------|----------------------------------------------------------|
| 1 | Cellular_org | Chlorobium phaeovibrioides                               |
| 1 | Cellular_org | Chlorobium phaeovibrioides DSM 265                       |
| 1 | Cellular_org | Chlorobium tepidum TLS                                   |
| 1 | Cellular_org | Chloroflexus aggregans DSM 9485                          |
| 1 | Cellular_org | Chloroflexus aurantiacus                                 |
| 1 | Cellular_org | Chloroflexus aurantiacus J-10-fl                         |
| 1 | Cellular_org | Chloroflexus sp. Y-400-fl                                |
| 1 | Cellular_org | Chloroherpeton thalassium                                |
| 1 | Cellular_org | Chloroherpeton thalassium ATCC 35110                     |
| 1 | Cellular_org | Chromobacterium violaceum                                |
| 1 | Cellular_org | Chromobacterium violaceum ATCC 12472                     |
| 1 | Cellular_org | Chromohalobacter salexigens                              |
| 1 | Cellular_org | Chromohalobacter salexigens DSM 3043                     |
| 1 | Cellular_org | Chryseobacterium gleum                                   |
| 1 | Cellular_org | Chryseobacterium gleum ATCC 35910                        |
| 1 | Cellular_org | Chthoniobacter flavus Ellin428                           |
| 1 | Cellular_org | Citricella sp. SE45                                      |
| 1 | Cellular_org | Citrobacter freundii                                     |
| 1 | Cellular_org | Citrobacter koseri                                       |
| 1 | Cellular_org | Citrobacter koseri ATCC BAA-895                          |
| 1 | Cellular_org | Citrobacter rodentium                                    |
| 1 | Cellular_org | Citrobacter rodentium ICC168                             |
| 1 | Cellular_org | Citrobacter sp. 30_2                                     |
| 1 | Cellular_org | Citrobacter youngae                                      |
| 1 | Cellular_org | Citrobacter youngae ATCC 29220                           |
| 1 | Cellular_org | Citromicrobium bathyomarinum JL354                       |
| 1 | Cellular_org | Clavibacter michiganensis                                |
| 1 | Cellular_org | Clavibacter michiganensis subsp. michiganensis           |
| 1 | Cellular_org | Clavibacter michiganensis subsp. michiganensis NCPPB 382 |
| 1 | Cellular_org | Clavibacter michiganensis subsp. sepedonicus             |
| 1 | Cellular_org | Clostridiales genomosp. BVAB3 str. UPII9-5               |
| 1 | Cellular_org | Clostridium acetobutylicum                               |
| 1 | Cellular_org | Clostridium acetobutylicum ATCC 824                      |
| 1 | Cellular_org | Clostridium asparagiforme DSM 15981                      |
| 1 | Cellular_org | Clostridium bartlettii DSM 16795                         |
| 1 | Cellular_org | Clostridium beijerinckii                                 |
| 1 | Cellular_org | Clostridium beijerinckii NCIMB 8052                      |
| 1 | Cellular_org | Clostridium bolteae                                      |
| 1 | Cellular_org | Clostridium bolteae ATCC BAA-613                         |
| 1 | Cellular_org | Clostridium botulinum                                    |
| 1 | Cellular_org | Clostridium botulinum A                                  |
| 1 | Cellular_org | Clostridium botulinum A str. ATCC 19397                  |

|   |              |                                               |
|---|--------------|-----------------------------------------------|
| 1 | Cellular_org | Clostridium botulinum A str. ATCC 3502        |
| 1 | Cellular_org | Clostridium botulinum A str. Hall             |
| 1 | Cellular_org | Clostridium botulinum A2 str. Kyoto           |
| 1 | Cellular_org | Clostridium botulinum A3 str. Loch Maree      |
| 1 | Cellular_org | Clostridium botulinum B                       |
| 1 | Cellular_org | Clostridium botulinum B str. Eklund 17B       |
| 1 | Cellular_org | Clostridium botulinum B1 str. Okra            |
| 1 | Cellular_org | Clostridium botulinum Ba4 str. 657            |
| 1 | Cellular_org | Clostridium botulinum Bf                      |
| 1 | Cellular_org | Clostridium botulinum C                       |
| 1 | Cellular_org | Clostridium botulinum C str. Eklund           |
| 1 | Cellular_org | Clostridium botulinum D                       |
| 1 | Cellular_org | Clostridium botulinum D str. 1873             |
| 1 | Cellular_org | Clostridium botulinum E                       |
| 1 | Cellular_org | Clostridium botulinum E1 str. 'BoNT E Beluga' |
| 1 | Cellular_org | Clostridium botulinum E3 str. Alaska E43      |
| 1 | Cellular_org | Clostridium botulinum F str. Langeland        |
| 1 | Cellular_org | Clostridium botulinum NCTC 2916               |
| 1 | Cellular_org | Clostridium butyricum                         |
| 1 | Cellular_org | Clostridium butyricum 5521                    |
| 1 | Cellular_org | Clostridium butyricum E4 str. BoNT E BL5262   |
| 1 | Cellular_org | Clostridium carboxidivorans P7                |
| 1 | Cellular_org | Clostridium cellulolyticum                    |
| 1 | Cellular_org | Clostridium cellulolyticum H10                |
| 1 | Cellular_org | Clostridium cellulovorans                     |
| 1 | Cellular_org | Clostridium cellulovorans 743B                |
| 1 | Cellular_org | Clostridium difficile                         |
| 1 | Cellular_org | Clostridium difficile 630                     |
| 1 | Cellular_org | Clostridium difficile ATCC 43255              |
| 1 | Cellular_org | Clostridium difficile CD196                   |
| 1 | Cellular_org | Clostridium difficile CIP 107932              |
| 1 | Cellular_org | Clostridium difficile NAP07                   |
| 1 | Cellular_org | Clostridium difficile NAP08                   |
| 1 | Cellular_org | Clostridium difficile QCD-23m63               |
| 1 | Cellular_org | Clostridium difficile QCD-32g58               |
| 1 | Cellular_org | Clostridium difficile QCD-37x79               |
| 1 | Cellular_org | Clostridium difficile QCD-63q42               |
| 1 | Cellular_org | Clostridium difficile QCD-66c26               |
| 1 | Cellular_org | Clostridium difficile QCD-76w55               |
| 1 | Cellular_org | Clostridium difficile QCD-97b34               |
| 1 | Cellular_org | Clostridium difficile R20291                  |
| 1 | Cellular_org | Clostridium hathewayi                         |
| 1 | Cellular_org | Clostridium hathewayi DSM 13479               |

|   |              |                                          |
|---|--------------|------------------------------------------|
| 1 | Cellular_org | Clostridium hiranonis DSM 13275          |
| 1 | Cellular_org | Clostridium hylemonae DSM 15053          |
| 1 | Cellular_org | Clostridium kluyveri                     |
| 1 | Cellular_org | Clostridium kluyveri DSM 555             |
| 1 | Cellular_org | Clostridium kluyveri NBRC 12016          |
| 1 | Cellular_org | Clostridium lentocellum DSM 5427         |
| 1 | Cellular_org | Clostridium leptum DSM 753               |
| 1 | Cellular_org | Clostridium ljungdahlii DSM 13528        |
| 1 | Cellular_org | Clostridium methylpentosum DSM 5476      |
| 1 | Cellular_org | Clostridium nexile DSM 1787              |
| 1 | Cellular_org | Clostridium novyi                        |
| 1 | Cellular_org | Clostridium novyi NT                     |
| 1 | Cellular_org | Clostridium papyrosolvens DSM 2782       |
| 1 | Cellular_org | Clostridium perfringens                  |
| 1 | Cellular_org | Clostridium perfringens ATCC 13124       |
| 1 | Cellular_org | Clostridium perfringens B                |
| 1 | Cellular_org | Clostridium perfringens B str. ATCC 3626 |
| 1 | Cellular_org | Clostridium perfringens C                |
| 1 | Cellular_org | Clostridium perfringens C str. JGS1495   |
| 1 | Cellular_org | Clostridium perfringens CPE str. F4969   |
| 1 | Cellular_org | Clostridium perfringens D                |
| 1 | Cellular_org | Clostridium perfringens D str. JGS1721   |
| 1 | Cellular_org | Clostridium perfringens E str. JGS1987   |
| 1 | Cellular_org | Clostridium perfringens NCTC 8239        |
| 1 | Cellular_org | Clostridium perfringens SM101            |
| 1 | Cellular_org | Clostridium perfringens str. 13          |
| 1 | Cellular_org | Clostridium phytofermentans ISDg         |
| 1 | Cellular_org | Clostridium ramosum                      |
| 1 | Cellular_org | Clostridium ramosum DSM 1402             |
| 1 | Cellular_org | Clostridium saccharolyticum WM1          |
| 1 | Cellular_org | Clostridium scindens                     |
| 1 | Cellular_org | Clostridium scindens ATCC 35704          |
| 1 | Cellular_org | Clostridium sp. 7_2_43FAA                |
| 1 | Cellular_org | Clostridium sp. L2-50                    |
| 1 | Cellular_org | Clostridium sp. M62/1                    |
| 1 | Cellular_org | Clostridium sp. MCF-1                    |
| 1 | Cellular_org | Clostridium sp. SS2/1                    |
| 1 | Cellular_org | Clostridium spiroforme                   |
| 1 | Cellular_org | Clostridium spiroforme DSM 1552          |
| 1 | Cellular_org | Clostridium sporogenes                   |
| 1 | Cellular_org | Clostridium sporogenes ATCC 15579        |
| 1 | Cellular_org | Clostridium sticklandii                  |
| 1 | Cellular_org | Clostridium sticklandii DSM 519          |

|   |              |                                                 |
|---|--------------|-------------------------------------------------|
| 1 | Cellular_org | <i>Clostridium symbiosum</i>                    |
| 1 | Cellular_org | <i>Clostridium tetani</i>                       |
| 1 | Cellular_org | <i>Clostridium tetani</i> E88                   |
| 1 | Cellular_org | <i>Clostridium thermocellum</i>                 |
| 1 | Cellular_org | <i>Clostridium thermocellum</i> ATCC 27405      |
| 1 | Cellular_org | <i>Clostridium thermocellum</i> DSM 2360        |
| 1 | Cellular_org | <i>Clostridium thermocellum</i> JW20            |
| 1 | Cellular_org | <i>Collimonas fungivorans</i>                   |
| 1 | Cellular_org | <i>Collinsella aerofaciens</i>                  |
| 1 | Cellular_org | <i>Collinsella aerofaciens</i> ATCC 25986       |
| 1 | Cellular_org | <i>Collinsella intestinalis</i> DSM 13280       |
| 1 | Cellular_org | <i>Collinsella stercoris</i> DSM 13279          |
| 1 | Cellular_org | <i>Colwellia psychrerythraea</i>                |
| 1 | Cellular_org | <i>Colwellia psychrerythraea</i> 34H            |
| 1 | Cellular_org | <i>Comamonas</i> sp. CNB-1                      |
| 1 | Cellular_org | <i>Comamonas testosteroni</i>                   |
| 1 | Cellular_org | <i>Comamonas testosteroni</i> CNB-2             |
| 1 | Cellular_org | <i>Comamonas testosteroni</i> KF-1              |
| 1 | Cellular_org | <i>Comamonas testosteroni</i> S44               |
| 1 | Cellular_org | <i>Conexibacter woesei</i> DSM 14684            |
| 1 | Cellular_org | <i>Congregibacter litoralis</i> KT71            |
| 1 | Cellular_org | <i>Coprobacillus</i> sp. D7                     |
| 1 | Cellular_org | <i>Coprococcus comes</i> ATCC 27758             |
| 1 | Cellular_org | <i>Coprococcus eutactus</i> ATCC 27759          |
| 1 | Cellular_org | <i>Coprothermobacter proteolyticus</i> DSM 5265 |
| 1 | Cellular_org | <i>Coralimargarita akajimensis</i> DSM 45221    |
| 1 | Cellular_org | <i>Corynebacterium accolens</i>                 |
| 1 | Cellular_org | <i>Corynebacterium accolens</i> ATCC 49725      |
| 1 | Cellular_org | <i>Corynebacterium accolens</i> ATCC 49726      |
| 1 | Cellular_org | <i>Corynebacterium ammoniagenes</i>             |
| 1 | Cellular_org | <i>Corynebacterium ammoniagenes</i> DSM 20306   |
| 1 | Cellular_org | <i>Corynebacterium amycolatum</i>               |
| 1 | Cellular_org | <i>Corynebacterium amycolatum</i> SK46          |
| 1 | Cellular_org | <i>Corynebacterium aurimucosum</i>              |
| 1 | Cellular_org | <i>Corynebacterium aurimucosum</i> ATCC 700975  |
| 1 | Cellular_org | <i>Corynebacterium callunae</i>                 |
| 1 | Cellular_org | <i>Corynebacterium casei</i>                    |
| 1 | Cellular_org | <i>Corynebacterium diphtheriae</i>              |
| 1 | Cellular_org | <i>Corynebacterium diphtheriae</i> NCTC 13129   |
| 1 | Cellular_org | <i>Corynebacterium efficiens</i>                |
| 1 | Cellular_org | <i>Corynebacterium efficiens</i> YS-314         |
| 1 | Cellular_org | <i>Corynebacterium genitalium</i> ATCC 33030    |
| 1 | Cellular_org | <i>Corynebacterium glucuronolyticum</i>         |

|   |              |                                             |
|---|--------------|---------------------------------------------|
| 1 | Cellular_org | Corynebacterium glucuronolyticum ATCC 51866 |
| 1 | Cellular_org | Corynebacterium glucuronolyticum ATCC 51867 |
| 1 | Cellular_org | Corynebacterium glutamicum                  |
| 1 | Cellular_org | Corynebacterium glutamicum ATCC 13032       |
| 1 | Cellular_org | Corynebacterium glutamicum R                |
| 1 | Cellular_org | Corynebacterium jeikeium                    |
| 1 | Cellular_org | Corynebacterium jeikeium ATCC 43734         |
| 1 | Cellular_org | Corynebacterium jeikeium K411               |
| 1 | Cellular_org | Corynebacterium kroppenstedtii DSM 44385    |
| 1 | Cellular_org | Corynebacterium lipophiloflavum             |
| 1 | Cellular_org | Corynebacterium lipophiloflavum DSM 44291   |
| 1 | Cellular_org | Corynebacterium matruchotii                 |
| 1 | Cellular_org | Corynebacterium matruchotii ATCC 14266      |
| 1 | Cellular_org | Corynebacterium matruchotii ATCC 33806      |
| 1 | Cellular_org | Corynebacterium pseudogenitalium            |
| 1 | Cellular_org | Corynebacterium pseudogenitalium ATCC 33035 |
| 1 | Cellular_org | Corynebacterium pseudotuberculosis          |
| 1 | Cellular_org | Corynebacterium pseudotuberculosis FRC41    |
| 1 | Cellular_org | Corynebacterium renale                      |
| 1 | Cellular_org | Corynebacterium resistens DSM 45100         |
| 1 | Cellular_org | Corynebacterium sp. L2-79-05                |
| 1 | Cellular_org | Corynebacterium striatum                    |
| 1 | Cellular_org | Corynebacterium striatum ATCC 6940          |
| 1 | Cellular_org | Corynebacterium tuberculostearicum          |
| 1 | Cellular_org | Corynebacterium tuberculostearicum SK141    |
| 1 | Cellular_org | Corynebacterium urealyticum                 |
| 1 | Cellular_org | Corynebacterium urealyticum DSM 7109        |
| 1 | Cellular_org | Corynebacterium variabile                   |
| 1 | Cellular_org | Coxiella burnetii                           |
| 1 | Cellular_org | Coxiella burnetii 'MSU Goat Q177'           |
| 1 | Cellular_org | Coxiella burnetii CbuG_Q212                 |
| 1 | Cellular_org | Coxiella burnetii CbuK_Q154                 |
| 1 | Cellular_org | Coxiella burnetii Dugway 5J108-111          |
| 1 | Cellular_org | Coxiella burnetii RSA 331                   |
| 1 | Cellular_org | Coxiella burnetii RSA 334                   |
| 1 | Cellular_org | Coxiella burnetii RSA 493                   |
| 1 | Cellular_org | Croceibacter atlanticus HTCC2559            |
| 1 | Cellular_org | Crocospaera watsonii                        |
| 1 | Cellular_org | Crocospaera watsonii WH 8501                |
| 1 | Cellular_org | Cronobacter sakazakii                       |
| 1 | Cellular_org | Cronobacter sakazakii ATCC BAA-894          |
| 1 | Cellular_org | Cronobacter turicensis                      |
| 1 | Cellular_org | Cronobacter turicensis z3032                |

|   |              |                                              |
|---|--------------|----------------------------------------------|
| 1 | Cellular_org | Cryptobacterium curtum DSM 15641             |
| 1 | Cellular_org | Cupriavidus metallidurans                    |
| 1 | Cellular_org | Cupriavidus metallidurans CH34               |
| 1 | Cellular_org | Cupriavidus necator                          |
| 1 | Cellular_org | Cupriavidus taiwanensis                      |
| 1 | Cellular_org | Cyanobium sp. PCC 7001                       |
| 1 | Cellular_org | Cyanothece sp. ATCC 51142                    |
| 1 | Cellular_org | Cyanothece sp. CCY0110                       |
| 1 | Cellular_org | Cyanothece sp. PCC 7424                      |
| 1 | Cellular_org | Cyanothece sp. PCC 7425                      |
| 1 | Cellular_org | Cyanothece sp. PCC 7822                      |
| 1 | Cellular_org | Cyanothece sp. PCC 8801                      |
| 1 | Cellular_org | Cyanothece sp. PCC 8802                      |
| 1 | Cellular_org | Cylindrospermopsis raciborskii               |
| 1 | Cellular_org | Cylindrospermopsis raciborskii CS-505        |
| 1 | Cellular_org | Cylindrospermum sp. A1345                    |
| 1 | Cellular_org | Cytophaga hutchinsonii                       |
| 1 | Cellular_org | Cytophaga hutchinsonii ATCC 33406            |
| 1 | Cellular_org | Dechloromonas aromatica RCB                  |
| 1 | Cellular_org | Deferribacter desulfuricans SSM1             |
| 1 | Cellular_org | Dehalococcoides ethenogenes                  |
| 1 | Cellular_org | Dehalococcoides ethenogenes 195              |
| 1 | Cellular_org | Dehalococcoides sp. BAV1                     |
| 1 | Cellular_org | Dehalococcoides sp. CBDB1                    |
| 1 | Cellular_org | Dehalococcoides sp. GT                       |
| 1 | Cellular_org | Dehalococcoides sp. VS                       |
| 1 | Cellular_org | Dehalogenimonas lykanthroporepellens BL-DC-9 |
| 1 | Cellular_org | Deinococcus deserti                          |
| 1 | Cellular_org | Deinococcus deserti VCD115                   |
| 1 | Cellular_org | Deinococcus geothermalis                     |
| 1 | Cellular_org | Deinococcus geothermalis DSM 11300           |
| 1 | Cellular_org | Deinococcus radiodurans                      |
| 1 | Cellular_org | Deinococcus radiodurans R1                   |
| 1 | Cellular_org | Deinococcus radiopugnans ATCC 19172          |
| 1 | Cellular_org | Delftia acidovorans                          |
| 1 | Cellular_org | Delftia acidovorans SPH-1                    |
| 1 | Cellular_org | Denitrovibrio acetiphilus DSM 12809          |
| 1 | Cellular_org | Dermacoccus sp. Ellin185                     |
| 1 | Cellular_org | Desulfarculus baarsii DSM 2075               |
| 1 | Cellular_org | Desulfatibacillum alkenivorans               |
| 1 | Cellular_org | Desulfatibacillum alkenivorans AK-01         |
| 1 | Cellular_org | Desulfitobacterium hafniense                 |
| 1 | Cellular_org | Desulfitobacterium hafniense DCB-2           |

|   |              |                                                                  |
|---|--------------|------------------------------------------------------------------|
| 1 | Cellular_org | Desulfitobacterium hafniense Y51                                 |
| 1 | Cellular_org | Desulfobacterium autotrophicum                                   |
| 1 | Cellular_org | Desulfobacterium autotrophicum HRM2                              |
| 1 | Cellular_org | Desulfobulbus propionicus                                        |
| 1 | Cellular_org | Desulfobulbus propionicus DSM 2032                               |
| 1 | Cellular_org | Desulfococcus oleovorans Hxd3                                    |
| 1 | Cellular_org | Desulfohalobium retbaense DSM 5692                               |
| 1 | Cellular_org | Desulfomicrobium baculatum                                       |
| 1 | Cellular_org | Desulfomicrobium baculatum DSM 4028                              |
| 1 | Cellular_org | Desulfonatronospira thiodismutans ASO3-1                         |
| 1 | Cellular_org | Desulfotalea psychrophila LSv54                                  |
| 1 | Cellular_org | Desulfotomaculum acetoxidans                                     |
| 1 | Cellular_org | Desulfotomaculum acetoxidans DSM 771                             |
| 1 | Cellular_org | Desulfotomaculum nigrificans                                     |
| 1 | Cellular_org | Desulfotomaculum nigrificans DSM 574                             |
| 1 | Cellular_org | Desulfotomaculum reducens MI-1                                   |
| 1 | Cellular_org | Desulfovibrio aespoensis                                         |
| 1 | Cellular_org | Desulfovibrio aespoensis Aspo-2                                  |
| 1 | Cellular_org | Desulfovibrio desulfuricans                                      |
| 1 | Cellular_org | Desulfovibrio desulfuricans subsp. desulfuricans                 |
| 1 | Cellular_org | Desulfovibrio desulfuricans subsp. desulfuricans str. ATCC 27774 |
| 1 | Cellular_org | Desulfovibrio desulfuricans subsp. desulfuricans str. G20        |
| 1 | Cellular_org | Desulfovibrio fructosovorans                                     |
| 1 | Cellular_org | Desulfovibrio fructosovorans JJ                                  |
| 1 | Cellular_org | Desulfovibrio magneticus RS-1                                    |
| 1 | Cellular_org | Desulfovibrio piger                                              |
| 1 | Cellular_org | Desulfovibrio piger ATCC 29098                                   |
| 1 | Cellular_org | Desulfovibrio salexigens                                         |
| 1 | Cellular_org | Desulfovibrio salexigens DSM 2638                                |
| 1 | Cellular_org | Desulfovibrio sp. 3_1_syn3                                       |
| 1 | Cellular_org | Desulfovibrio sp. FW1012B                                        |
| 1 | Cellular_org | Desulfovibrio vulgaris                                           |
| 1 | Cellular_org | Desulfovibrio vulgaris DP4                                       |
| 1 | Cellular_org | Desulfovibrio vulgaris str. 'Miyazaki F'                         |
| 1 | Cellular_org | Desulfovibrio vulgaris str. Hildenborough                        |
| 1 | Cellular_org | Desulfurivibrio alkaliphilus AHT2                                |
| 1 | Cellular_org | Desulfuromonas acetoxidans                                       |
| 1 | Cellular_org | Desulfuromonas acetoxidans DSM 684                               |
| 1 | Cellular_org | Dethiobacter alkaliphilus AHT 1                                  |
| 1 | Cellular_org | Dethiosulfovibrio peptidovorans DSM 11002                        |
| 1 | Cellular_org | Dialister invisus DSM 15470                                      |
| 1 | Cellular_org | Dialister micraerophilus                                         |

|   |              |                                         |
|---|--------------|-----------------------------------------|
| 1 | Cellular_org | Dichelobacter nodosus                   |
| 1 | Cellular_org | Dichelobacter nodosus VCS1703A          |
| 1 | Cellular_org | Dickeya dadantii                        |
| 1 | Cellular_org | Dickeya dadantii 3937                   |
| 1 | Cellular_org | Dickeya dadantii Ech586                 |
| 1 | Cellular_org | Dickeya dadantii Ech703                 |
| 1 | Cellular_org | Dickeya zeae                            |
| 1 | Cellular_org | Dickeya zeae Ech1591                    |
| 1 | Cellular_org | Dictyoglomus thermophilum               |
| 1 | Cellular_org | Dictyoglomus thermophilum H-6-12        |
| 1 | Cellular_org | Dictyoglomus turgidum DSM 6724          |
| 1 | Cellular_org | Dietzia cinnamea                        |
| 1 | Cellular_org | Dinoroseobacter shibae DFL 12           |
| 1 | Cellular_org | Dokdonia donghaensis                    |
| 1 | Cellular_org | Dokdonia donghaensis MED134             |
| 1 | Cellular_org | Dorea formicigenerans ATCC 27755        |
| 1 | Cellular_org | Dorea longicatena DSM 13814             |
| 1 | Cellular_org | Dyadobacter fermentans DSM 18053        |
| 1 | Cellular_org | Edwardsiella ictaluri                   |
| 1 | Cellular_org | Edwardsiella ictaluri 93-146            |
| 1 | Cellular_org | Edwardsiella tarda                      |
| 1 | Cellular_org | Edwardsiella tarda ATCC 23685           |
| 1 | Cellular_org | Edwardsiella tarda EIB202               |
| 1 | Cellular_org | Eggerthella lenta                       |
| 1 | Cellular_org | Eggerthella lenta DSM 2243              |
| 1 | Cellular_org | Ehrlichia canis                         |
| 1 | Cellular_org | Ehrlichia canis str. Jake               |
| 1 | Cellular_org | Ehrlichia chaffeensis                   |
| 1 | Cellular_org | Ehrlichia chaffeensis str. Arkansas     |
| 1 | Cellular_org | Ehrlichia chaffeensis str. Sapulpa      |
| 1 | Cellular_org | Ehrlichia ruminantium str. Gardel       |
| 1 | Cellular_org | Ehrlichia ruminantium str. Welgevonden  |
| 1 | Cellular_org | Eikenella corrodens                     |
| 1 | Cellular_org | Eikenella corrodens ATCC 23834          |
| 1 | Cellular_org | Elusimicrobium minutum Pei191           |
| 1 | Cellular_org | Endoriftia persephone 'Hot96_1+Hot96_2' |
| 1 | Cellular_org | Enhydrobacter aerosaccus SK60           |
| 1 | Cellular_org | Enterobacter aerogenes                  |
| 1 | Cellular_org | Enterobacter cancerogenus               |
| 1 | Cellular_org | Enterobacter cancerogenus ATCC 35316    |
| 1 | Cellular_org | Enterobacter cloacae                    |
| 1 | Cellular_org | Enterobacter cloacae SCF1               |
| 1 | Cellular_org | Enterobacter cloacae subsp. cloacae     |



|   |              |                                                |
|---|--------------|------------------------------------------------|
| 1 | Cellular_org | Enterobacter cloacae subsp. cloacae ATCC 13047 |
| 1 | Cellular_org | Enterobacter sp. 638                           |
| 1 | Cellular_org | Enterobacter sp. RFL1396                       |
| 1 | Cellular_org | Enterococcus casseliflavus                     |
| 1 | Cellular_org | Enterococcus casseliflavus EC10                |
| 1 | Cellular_org | Enterococcus casseliflavus EC20                |
| 1 | Cellular_org | Enterococcus casseliflavus EC30                |
| 1 | Cellular_org | Enterococcus faecalis                          |
| 1 | Cellular_org | Enterococcus faecalis ATCC 29200               |
| 1 | Cellular_org | Enterococcus faecalis ATCC 4200                |
| 1 | Cellular_org | Enterococcus faecalis CH188                    |
| 1 | Cellular_org | Enterococcus faecalis D6                       |
| 1 | Cellular_org | Enterococcus faecalis DAPTO 512                |
| 1 | Cellular_org | Enterococcus faecalis DS5                      |
| 1 | Cellular_org | Enterococcus faecalis E1Sol                    |
| 1 | Cellular_org | Enterococcus faecalis Fly1                     |
| 1 | Cellular_org | Enterococcus faecalis HH22                     |
| 1 | Cellular_org | Enterococcus faecalis HIP11704                 |
| 1 | Cellular_org | Enterococcus faecalis JH1                      |
| 1 | Cellular_org | Enterococcus faecalis Merz96                   |
| 1 | Cellular_org | Enterococcus faecalis OG1RF                    |
| 1 | Cellular_org | Enterococcus faecalis PC1.1                    |
| 1 | Cellular_org | Enterococcus faecalis R712                     |
| 1 | Cellular_org | Enterococcus faecalis S613                     |
| 1 | Cellular_org | Enterococcus faecalis T1                       |
| 1 | Cellular_org | Enterococcus faecalis T11                      |
| 1 | Cellular_org | Enterococcus faecalis T2                       |
| 1 | Cellular_org | Enterococcus faecalis T3                       |
| 1 | Cellular_org | Enterococcus faecalis T8                       |
| 1 | Cellular_org | Enterococcus faecalis TUSoD Ef11               |
| 1 | Cellular_org | Enterococcus faecalis TX0102                   |
| 1 | Cellular_org | Enterococcus faecalis TX0104                   |
| 1 | Cellular_org | Enterococcus faecalis TX0109                   |
| 1 | Cellular_org | Enterococcus faecalis TX0411                   |
| 1 | Cellular_org | Enterococcus faecalis TX0635                   |
| 1 | Cellular_org | Enterococcus faecalis TX0855                   |
| 1 | Cellular_org | Enterococcus faecalis TX0860                   |
| 1 | Cellular_org | Enterococcus faecalis TX1322                   |
| 1 | Cellular_org | Enterococcus faecalis TX2134                   |
| 1 | Cellular_org | Enterococcus faecalis TX4248                   |
| 1 | Cellular_org | Enterococcus faecalis V583                     |
| 1 | Cellular_org | Enterococcus faecalis X98                      |
| 1 | Cellular_org | Enterococcus faecium                           |

|   |              |                                         |
|---|--------------|-----------------------------------------|
| 1 | Cellular_org | Enterococcus faecium 1,141,733          |
| 1 | Cellular_org | Enterococcus faecium 1,230,933          |
| 1 | Cellular_org | Enterococcus faecium 1,231,408          |
| 1 | Cellular_org | Enterococcus faecium 1,231,410          |
| 1 | Cellular_org | Enterococcus faecium 1,231,501          |
| 1 | Cellular_org | Enterococcus faecium 1,231,502          |
| 1 | Cellular_org | Enterococcus faecium C68                |
| 1 | Cellular_org | Enterococcus faecium Com12              |
| 1 | Cellular_org | Enterococcus faecium Com15              |
| 1 | Cellular_org | Enterococcus faecium D344SRF            |
| 1 | Cellular_org | Enterococcus faecium DO                 |
| 1 | Cellular_org | Enterococcus faecium E1039              |
| 1 | Cellular_org | Enterococcus faecium E1071              |
| 1 | Cellular_org | Enterococcus faecium E1162              |
| 1 | Cellular_org | Enterococcus faecium E1636              |
| 1 | Cellular_org | Enterococcus faecium E1679              |
| 1 | Cellular_org | Enterococcus faecium E980               |
| 1 | Cellular_org | Enterococcus faecium PC4.1              |
| 1 | Cellular_org | Enterococcus faecium TC 6               |
| 1 | Cellular_org | Enterococcus faecium TX1330             |
| 1 | Cellular_org | Enterococcus faecium U0317              |
| 1 | Cellular_org | Enterococcus gallinarum                 |
| 1 | Cellular_org | Enterococcus gallinarum EG2             |
| 1 | Cellular_org | Enterococcus italicus                   |
| 1 | Cellular_org | Epulopiscium sp. 'N.t. morphotype B'    |
| 1 | Cellular_org | Erwinia amylovora                       |
| 1 | Cellular_org | Erwinia amylovora ATCC 49946            |
| 1 | Cellular_org | Erwinia amylovora CFBP1430              |
| 1 | Cellular_org | Erwinia billingiae                      |
| 1 | Cellular_org | Erwinia billingiae Eb661                |
| 1 | Cellular_org | Erwinia pyrifoliae                      |
| 1 | Cellular_org | Erwinia pyrifoliae Ep1/96               |
| 1 | Cellular_org | Erwinia sp. Ejp 556                     |
| 1 | Cellular_org | Erwinia tasmaniensis                    |
| 1 | Cellular_org | Erwinia tasmaniensis Et1/99             |
| 1 | Cellular_org | Erysipelothrix rhusiopathiae            |
| 1 | Cellular_org | Erysipelothrix rhusiopathiae ATCC 19414 |
| 1 | Cellular_org | Erysipelotrichaceae bacterium 3_1_53    |
| 1 | Cellular_org | Erysipelotrichaceae bacterium 5_2_54FAA |
| 1 | Cellular_org | Erythrobacter litoralis                 |
| 1 | Cellular_org | Erythrobacter litoralis HTCC2594        |
| 1 | Cellular_org | Erythrobacter sp. NAP1                  |
| 1 | Cellular_org | Erythrobacter sp. SD-21                 |

|   |              |                                           |
|---|--------------|-------------------------------------------|
| 1 | Cellular_org | Escherichia albertii                      |
| 1 | Cellular_org | Escherichia albertii TW07627              |
| 1 | Cellular_org | Escherichia coli                          |
| 1 | Cellular_org | Escherichia coli 'BL21-Gold(DE3)pLysS AG' |
| 1 | Cellular_org | Escherichia coli 101-1                    |
| 1 | Cellular_org | Escherichia coli 1520                     |
| 1 | Cellular_org | Escherichia coli 1827-70                  |
| 1 | Cellular_org | Escherichia coli 536                      |
| 1 | Cellular_org | Escherichia coli 53638                    |
| 1 | Cellular_org | Escherichia coli 55989                    |
| 1 | Cellular_org | Escherichia coli 83972                    |
| 1 | Cellular_org | Escherichia coli APEC O1                  |
| 1 | Cellular_org | Escherichia coli ATCC 8739                |
| 1 | Cellular_org | Escherichia coli B                        |
| 1 | Cellular_org | Escherichia coli B str. REL606            |
| 1 | Cellular_org | Escherichia coli B088                     |
| 1 | Cellular_org | Escherichia coli B171                     |
| 1 | Cellular_org | Escherichia coli B185                     |
| 1 | Cellular_org | Escherichia coli B354                     |
| 1 | Cellular_org | Escherichia coli B7A                      |
| 1 | Cellular_org | Escherichia coli BW2952                   |
| 1 | Cellular_org | Escherichia coli CFT073                   |
| 1 | Cellular_org | Escherichia coli E110019                  |
| 1 | Cellular_org | Escherichia coli E22                      |
| 1 | Cellular_org | Escherichia coli E24377A                  |
| 1 | Cellular_org | Escherichia coli ED1a                     |
| 1 | Cellular_org | Escherichia coli ETEC 1392/75             |
| 1 | Cellular_org | Escherichia coli ETEC H10407              |
| 1 | Cellular_org | Escherichia coli F11                      |
| 1 | Cellular_org | Escherichia coli FVEC1302                 |
| 1 | Cellular_org | Escherichia coli FVEC1412                 |
| 1 | Cellular_org | Escherichia coli H299                     |
| 1 | Cellular_org | Escherichia coli H591                     |
| 1 | Cellular_org | Escherichia coli H736                     |
| 1 | Cellular_org | Escherichia coli HS                       |
| 1 | Cellular_org | Escherichia coli IA11                     |
| 1 | Cellular_org | Escherichia coli IAI39                    |
| 1 | Cellular_org | Escherichia coli K-12                     |
| 1 | Cellular_org | Escherichia coli M605                     |
| 1 | Cellular_org | Escherichia coli M718                     |
| 1 | Cellular_org | Escherichia coli MS 107-1                 |
| 1 | Cellular_org | Escherichia coli MS 115-1                 |
| 1 | Cellular_org | Escherichia coli MS 116-1                 |

|   |              |                                        |
|---|--------------|----------------------------------------|
| 1 | Cellular_org | Escherichia coli MS 119-7              |
| 1 | Cellular_org | Escherichia coli MS 124-1              |
| 1 | Cellular_org | Escherichia coli MS 145-7              |
| 1 | Cellular_org | Escherichia coli MS 146-1              |
| 1 | Cellular_org | Escherichia coli MS 175-1              |
| 1 | Cellular_org | Escherichia coli MS 182-1              |
| 1 | Cellular_org | Escherichia coli MS 185-1              |
| 1 | Cellular_org | Escherichia coli MS 187-1              |
| 1 | Cellular_org | Escherichia coli MS 196-1              |
| 1 | Cellular_org | Escherichia coli MS 198-1              |
| 1 | Cellular_org | Escherichia coli MS 200-1              |
| 1 | Cellular_org | Escherichia coli MS 21-1               |
| 1 | Cellular_org | Escherichia coli MS 45-1               |
| 1 | Cellular_org | Escherichia coli MS 69-1               |
| 1 | Cellular_org | Escherichia coli MS 78-1               |
| 1 | Cellular_org | Escherichia coli MS 84-1               |
| 1 | Cellular_org | Escherichia coli NC101                 |
| 1 | Cellular_org | Escherichia coli O103:H2               |
| 1 | Cellular_org | Escherichia coli O103:H2 str. 12009    |
| 1 | Cellular_org | Escherichia coli O111:H-               |
| 1 | Cellular_org | Escherichia coli O111:H- str. 11128    |
| 1 | Cellular_org | Escherichia coli O127:H6               |
| 1 | Cellular_org | Escherichia coli O127:H6 str. E2348/69 |
| 1 | Cellular_org | Escherichia coli O157:H7               |
| 1 | Cellular_org | Escherichia coli O157:H7 str. EC4024   |
| 1 | Cellular_org | Escherichia coli O157:H7 str. EC4042   |
| 1 | Cellular_org | Escherichia coli O157:H7 str. EC4045   |
| 1 | Cellular_org | Escherichia coli O157:H7 str. EC4076   |
| 1 | Cellular_org | Escherichia coli O157:H7 str. EC4113   |
| 1 | Cellular_org | Escherichia coli O157:H7 str. EC4115   |
| 1 | Cellular_org | Escherichia coli O157:H7 str. EC4196   |
| 1 | Cellular_org | Escherichia coli O157:H7 str. EC4206   |
| 1 | Cellular_org | Escherichia coli O157:H7 str. EC4401   |
| 1 | Cellular_org | Escherichia coli O157:H7 str. EC4486   |
| 1 | Cellular_org | Escherichia coli O157:H7 str. EC4501   |
| 1 | Cellular_org | Escherichia coli O157:H7 str. EC508    |
| 1 | Cellular_org | Escherichia coli O157:H7 str. EC869    |
| 1 | Cellular_org | Escherichia coli O157:H7 str. FRIK2000 |
| 1 | Cellular_org | Escherichia coli O157:H7 str. FRIK966  |
| 1 | Cellular_org | Escherichia coli O157:H7 str. Sakai    |
| 1 | Cellular_org | Escherichia coli O157:H7 str. TW14359  |
| 1 | Cellular_org | Escherichia coli O157:H7 str. TW14588  |
| 1 | Cellular_org | Escherichia coli O26:H-                |

|   |              |                                                |
|---|--------------|------------------------------------------------|
| 1 | Cellular_org | Escherichia coli O26:H11                       |
| 1 | Cellular_org | Escherichia coli O26:H11 str. 11368            |
| 1 | Cellular_org | Escherichia coli O55:H7                        |
| 1 | Cellular_org | Escherichia coli O55:H7 str. CB9615            |
| 1 | Cellular_org | Escherichia coli OP50                          |
| 1 | Cellular_org | Escherichia coli S88                           |
| 1 | Cellular_org | Escherichia coli SE11                          |
| 1 | Cellular_org | Escherichia coli SMS-3-5                       |
| 1 | Cellular_org | Escherichia coli TA143                         |
| 1 | Cellular_org | Escherichia coli TA206                         |
| 1 | Cellular_org | Escherichia coli TA271                         |
| 1 | Cellular_org | Escherichia coli TA280                         |
| 1 | Cellular_org | Escherichia coli UMN026                        |
| 1 | Cellular_org | Escherichia coli UTI89                         |
| 1 | Cellular_org | Escherichia coli Vir68                         |
| 1 | Cellular_org | Escherichia coli W                             |
| 1 | Cellular_org | Escherichia coli str. K-12 substr. DH10B       |
| 1 | Cellular_org | Escherichia coli str. K-12 substr. MG1655      |
| 1 | Cellular_org | Escherichia coli str. K-12 substr. W3110       |
| 1 | Cellular_org | Escherichia fergusonii                         |
| 1 | Cellular_org | Escherichia fergusonii ATCC 35469              |
| 1 | Cellular_org | Escherichia sp. 1_1_43                         |
| 1 | Cellular_org | Escherichia sp. 3_2_53FAA                      |
| 1 | Cellular_org | Escherichia sp. 4_1_40B                        |
| 1 | Cellular_org | Escherichia sp. Sflu5                          |
| 1 | Cellular_org | Ethanoligenens harbinense                      |
| 1 | Cellular_org | Ethanoligenens harbinense YUAN-3               |
| 1 | Cellular_org | Eubacterium bifforme DSM 3989                  |
| 1 | Cellular_org | Eubacterium cellulosolvens                     |
| 1 | Cellular_org | Eubacterium dolichum DSM 3991                  |
| 1 | Cellular_org | Eubacterium eligens ATCC 27750                 |
| 1 | Cellular_org | Eubacterium hallii                             |
| 1 | Cellular_org | Eubacterium hallii DSM 3353                    |
| 1 | Cellular_org | Eubacterium limosum                            |
| 1 | Cellular_org | Eubacterium limosum KIST612                    |
| 1 | Cellular_org | Eubacterium rectale                            |
| 1 | Cellular_org | Eubacterium rectale ATCC 33656                 |
| 1 | Cellular_org | Eubacterium saburreum                          |
| 1 | Cellular_org | Eubacterium saphenum ATCC 49989                |
| 1 | Cellular_org | Eubacterium siraeum DSM 15702                  |
| 1 | Cellular_org | Eubacterium ventriosum                         |
| 1 | Cellular_org | Eubacterium ventriosum ATCC 27560              |
| 1 | Cellular_org | Eubacterium yurii subsp. margaretae ATCC 43715 |

|   |              |                                                         |
|---|--------------|---------------------------------------------------------|
| 1 | Cellular_org | Exiguobacterium arabatum                                |
| 1 | Cellular_org | Exiguobacterium sibiricum                               |
| 1 | Cellular_org | Exiguobacterium sibiricum 255-15                        |
| 1 | Cellular_org | Exiguobacterium sp. AT1b                                |
| 1 | Cellular_org | Faecalibacterium cf. prausnitzii KLE1255                |
| 1 | Cellular_org | Faecalibacterium prausnitzii                            |
| 1 | Cellular_org | Faecalibacterium prausnitzii A2-165                     |
| 1 | Cellular_org | Faecalibacterium prausnitzii M21/2                      |
| 1 | Cellular_org | Ferrimonas balearica                                    |
| 1 | Cellular_org | Ferrimonas balearica DSM 9799                           |
| 1 | Cellular_org | Fervidobacterium nodosum Rt17-B1                        |
| 1 | Cellular_org | Fibrobacter succinogenes                                |
| 1 | Cellular_org | Fibrobacter succinogenes subsp. succinogenes S85        |
| 1 | Cellular_org | Finegoldia magna                                        |
| 1 | Cellular_org | Finegoldia magna ACS-171-V-Col3                         |
| 1 | Cellular_org | Finegoldia magna ATCC 29328                             |
| 1 | Cellular_org | Finegoldia magna ATCC 53516                             |
| 1 | Cellular_org | Finegoldia magna BVS033A4                               |
| 1 | Cellular_org | Flavobacteria bacterium BAL38                           |
| 1 | Cellular_org | Flavobacteria bacterium BBFL7                           |
| 1 | Cellular_org | Flavobacteria bacterium MS024-2A                        |
| 1 | Cellular_org | Flavobacteria bacterium MS024-3C                        |
| 1 | Cellular_org | Flavobacteriaceae bacterium 3519-10                     |
| 1 | Cellular_org | Flavobacteriales bacterium ALC-1                        |
| 1 | Cellular_org | Flavobacterium johnsoniae                               |
| 1 | Cellular_org | Flavobacterium johnsoniae UW101                         |
| 1 | Cellular_org | Flavobacterium psychrophilum                            |
| 1 | Cellular_org | Flavobacterium psychrophilum JIP02/86                   |
| 1 | Cellular_org | Flavobacterium sp.                                      |
| 1 | Cellular_org | Flavobacterium sp. KI723T1                              |
| 1 | Cellular_org | Fluoribacter dumoffii                                   |
| 1 | Cellular_org | Francisella novicida                                    |
| 1 | Cellular_org | Francisella novicida FTG                                |
| 1 | Cellular_org | Francisella novicida GA99-3548                          |
| 1 | Cellular_org | Francisella novicida GA99-3549                          |
| 1 | Cellular_org | Francisella novicida U112                               |
| 1 | Cellular_org | Francisella philomiragia                                |
| 1 | Cellular_org | Francisella philomiragia subsp. philomiragia ATCC 25015 |
| 1 | Cellular_org | Francisella philomiragia subsp. philomiragia ATCC 25017 |
| 1 | Cellular_org | Francisella tularensis                                  |
| 1 | Cellular_org | Francisella tularensis subsp. holarctica                |
| 1 | Cellular_org | Francisella tularensis subsp. holarctica 257            |
| 1 | Cellular_org | Francisella tularensis subsp. holarctica FSC022         |

|   |              |                                                       |
|---|--------------|-------------------------------------------------------|
| 1 | Cellular_org | Francisella tularensis subsp. holarctica FSC200       |
| 1 | Cellular_org | Francisella tularensis subsp. holarctica FTNF002-00   |
| 1 | Cellular_org | Francisella tularensis subsp. holarctica LVS          |
| 1 | Cellular_org | Francisella tularensis subsp. holarctica OSU18        |
| 1 | Cellular_org | Francisella tularensis subsp. holarctica URFT1        |
| 1 | Cellular_org | Francisella tularensis subsp. mediasiatica            |
| 1 | Cellular_org | Francisella tularensis subsp. mediasiatica FSC147     |
| 1 | Cellular_org | Francisella tularensis subsp. tularensis              |
| 1 | Cellular_org | Francisella tularensis subsp. tularensis FSC033       |
| 1 | Cellular_org | Francisella tularensis subsp. tularensis FSC198       |
| 1 | Cellular_org | Francisella tularensis subsp. tularensis MA00-2987    |
| 1 | Cellular_org | Francisella tularensis subsp. tularensis SCHU S4      |
| 1 | Cellular_org | Francisella tularensis subsp. tularensis WY96-3418    |
| 1 | Cellular_org | Frankia alni                                          |
| 1 | Cellular_org | Frankia alni ACN14a                                   |
| 1 | Cellular_org | Frankia sp. Ccl3                                      |
| 1 | Cellular_org | Frankia sp. Cpl1                                      |
| 1 | Cellular_org | Frankia sp. EAN1pec                                   |
| 1 | Cellular_org | Frankia sp. EUN1f                                     |
| 1 | Cellular_org | Frankia sp. Eu1c                                      |
| 1 | Cellular_org | Frankia symbiont of Datisca glomerata                 |
| 1 | Cellular_org | Fulvimarina pelagi HTCC2506                           |
| 1 | Cellular_org | Fusobacterium gonidiaformans ATCC 25563               |
| 1 | Cellular_org | Fusobacterium mortiferum                              |
| 1 | Cellular_org | Fusobacterium mortiferum ATCC 9817                    |
| 1 | Cellular_org | Fusobacterium nucleatum                               |
| 1 | Cellular_org | Fusobacterium nucleatum subsp. nucleatum              |
| 1 | Cellular_org | Fusobacterium nucleatum subsp. nucleatum ATCC 23726   |
| 1 | Cellular_org | Fusobacterium nucleatum subsp. nucleatum ATCC 25586   |
| 1 | Cellular_org | Fusobacterium nucleatum subsp. polymorphum ATCC 10953 |
| 1 | Cellular_org | Fusobacterium nucleatum subsp. vincentii ATCC 49256   |
| 1 | Cellular_org | Fusobacterium periodonticum                           |
| 1 | Cellular_org | Fusobacterium periodonticum ATCC 33693                |
| 1 | Cellular_org | Fusobacterium sp. 1_1_41FAA                           |
| 1 | Cellular_org | Fusobacterium sp. 2_1_31                              |
| 1 | Cellular_org | Fusobacterium sp. 3_1_27                              |
| 1 | Cellular_org | Fusobacterium sp. 3_1_33                              |
| 1 | Cellular_org | Fusobacterium sp. 3_1_36A2                            |
| 1 | Cellular_org | Fusobacterium sp. 3_1_5R                              |
| 1 | Cellular_org | Fusobacterium sp. 4_1_13                              |
| 1 | Cellular_org | Fusobacterium sp. 7_1                                 |
| 1 | Cellular_org | Fusobacterium sp. D11                                 |

|   |              |                                          |
|---|--------------|------------------------------------------|
| 1 | Cellular_org | Fusobacterium sp. D12                    |
| 1 | Cellular_org | Fusobacterium ulcerans ATCC 49185        |
| 1 | Cellular_org | Fusobacterium varium                     |
| 1 | Cellular_org | Fusobacterium varium ATCC 27725          |
| 1 | Cellular_org | Gallionella capsiferriformans ES-2       |
| 1 | Cellular_org | Gardnerella vaginalis                    |
| 1 | Cellular_org | Gardnerella vaginalis 409-05             |
| 1 | Cellular_org | Gardnerella vaginalis 5-1                |
| 1 | Cellular_org | Gardnerella vaginalis AMD                |
| 1 | Cellular_org | Gardnerella vaginalis ATCC 14018         |
| 1 | Cellular_org | Gardnerella vaginalis ATCC 14019         |
| 1 | Cellular_org | Gemella haemolysans                      |
| 1 | Cellular_org | Gemella haemolysans ATCC 10379           |
| 1 | Cellular_org | Gemella morbillorum                      |
| 1 | Cellular_org | Gemmata obscuriglobus UQM 2246           |
| 1 | Cellular_org | Gemmatimonas aurantiaca T-27             |
| 1 | Cellular_org | Geobacillus kaustophilus                 |
| 1 | Cellular_org | Geobacillus kaustophilus HTA426          |
| 1 | Cellular_org | Geobacillus sp. C56-T3                   |
| 1 | Cellular_org | Geobacillus sp. G11MC16                  |
| 1 | Cellular_org | Geobacillus sp. WCH70                    |
| 1 | Cellular_org | Geobacillus sp. Y4.1MC1                  |
| 1 | Cellular_org | Geobacillus sp. Y412MC52                 |
| 1 | Cellular_org | Geobacillus sp. Y412MC61                 |
| 1 | Cellular_org | Geobacillus stearothermophilus           |
| 1 | Cellular_org | Geobacillus thermodenitrificans          |
| 1 | Cellular_org | Geobacillus thermodenitrificans NG80-2   |
| 1 | Cellular_org | Geobacillus thermoglucosidasius          |
| 1 | Cellular_org | Geobacillus thermoglucosidasius C56-YS93 |
| 1 | Cellular_org | Geobacter bemidjiensis                   |
| 1 | Cellular_org | Geobacter bemidjiensis Bem               |
| 1 | Cellular_org | Geobacter lovleyi SZ                     |
| 1 | Cellular_org | Geobacter metallireducens                |
| 1 | Cellular_org | Geobacter metallireducens GS-15          |
| 1 | Cellular_org | Geobacter sp. FRC-32                     |
| 1 | Cellular_org | Geobacter sp. M18                        |
| 1 | Cellular_org | Geobacter sp. M21                        |
| 1 | Cellular_org | Geobacter sulfurreducens                 |
| 1 | Cellular_org | Geobacter sulfurreducens PCA             |
| 1 | Cellular_org | Geobacter uraniireducens Rf4             |
| 1 | Cellular_org | Geodermatophilus obscurus                |
| 1 | Cellular_org | Geodermatophilus obscurus DSM 43160      |
| 1 | Cellular_org | Glaciecola sp. HTCC2999                  |



|   |              |                                          |
|---|--------------|------------------------------------------|
| 1 | Cellular_org | Gloeobacter violaceus                    |
| 1 | Cellular_org | Gloeobacter violaceus PCC 7421           |
| 1 | Cellular_org | Gluconacetobacter diazotrophicus         |
| 1 | Cellular_org | Gluconacetobacter diazotrophicus PAI 5   |
| 1 | Cellular_org | Gluconacetobacter hansenii               |
| 1 | Cellular_org | Gluconacetobacter hansenii ATCC 23769    |
| 1 | Cellular_org | Gluconacetobacter xylinus                |
| 1 | Cellular_org | Gluconacetobacter xylinus NBRC 3288      |
| 1 | Cellular_org | Gluconobacter oxydans                    |
| 1 | Cellular_org | Gluconobacter oxydans 621H               |
| 1 | Cellular_org | Gordonia bronchialis                     |
| 1 | Cellular_org | Gordonia bronchialis DSM 43247           |
| 1 | Cellular_org | Gordonia westfalica                      |
| 1 | Cellular_org | Gramella forsetii KT0803                 |
| 1 | Cellular_org | Granulibacter bethesdensis               |
| 1 | Cellular_org | Granulibacter bethesdensis CGDNIH1       |
| 1 | Cellular_org | Granulicatella adiacens                  |
| 1 | Cellular_org | Granulicatella adiacens ATCC 49175       |
| 1 | Cellular_org | Granulicatella elegans                   |
| 1 | Cellular_org | Granulicatella elegans ATCC 700633       |
| 1 | Cellular_org | Grimontia hollisae                       |
| 1 | Cellular_org | Grimontia hollisae CIP 101886            |
| 1 | Cellular_org | Haemophilus ducreyi                      |
| 1 | Cellular_org | Haemophilus ducreyi 35000HP              |
| 1 | Cellular_org | Haemophilus influenzae                   |
| 1 | Cellular_org | Haemophilus influenzae 22.1-21           |
| 1 | Cellular_org | Haemophilus influenzae 22.4-21           |
| 1 | Cellular_org | Haemophilus influenzae 3655              |
| 1 | Cellular_org | Haemophilus influenzae 6P18H1            |
| 1 | Cellular_org | Haemophilus influenzae 7P49H1            |
| 1 | Cellular_org | Haemophilus influenzae 86-028NP          |
| 1 | Cellular_org | Haemophilus influenzae HK1212            |
| 1 | Cellular_org | Haemophilus influenzae NT127             |
| 1 | Cellular_org | Haemophilus influenzae PittAA            |
| 1 | Cellular_org | Haemophilus influenzae PittEE            |
| 1 | Cellular_org | Haemophilus influenzae PittGG            |
| 1 | Cellular_org | Haemophilus influenzae PittHH            |
| 1 | Cellular_org | Haemophilus influenzae PittII            |
| 1 | Cellular_org | Haemophilus influenzae R3021             |
| 1 | Cellular_org | Haemophilus influenzae Rd KW20           |
| 1 | Cellular_org | Haemophilus influenzae RdAW              |
| 1 | Cellular_org | Haemophilus influenzae biotype aegyptius |
| 1 | Cellular_org | Haemophilus parasuis                     |

|   |              |                                      |
|---|--------------|--------------------------------------|
| 1 | Cellular_org | Haemophilus parasuis 29755           |
| 1 | Cellular_org | Haemophilus parasuis SH0165          |
| 1 | Cellular_org | Haemophilus somnus 129PT             |
| 1 | Cellular_org | Haemophilus somnus 2336              |
| 1 | Cellular_org | Hafnia alvei                         |
| 1 | Cellular_org | Hahella chejuensis KCTC 2396         |
| 1 | Cellular_org | Haliangium ochraceum DSM 14365       |
| 1 | Cellular_org | Halomonas elongata                   |
| 1 | Cellular_org | Halomonas elongata DSM 2581          |
| 1 | Cellular_org | Halorhodospira halophila             |
| 1 | Cellular_org | Halorhodospira halophila SL1         |
| 1 | Cellular_org | Halothermothrix orenii               |
| 1 | Cellular_org | Halothermothrix orenii H 168         |
| 1 | Cellular_org | Halothiobacillus neapolitanus        |
| 1 | Cellular_org | Halothiobacillus neapolitanus c2     |
| 1 | Cellular_org | Helicobacter acinonychis             |
| 1 | Cellular_org | Helicobacter acinonychis str. Sheeba |
| 1 | Cellular_org | Helicobacter bilis                   |
| 1 | Cellular_org | Helicobacter bilis ATCC 43879        |
| 1 | Cellular_org | Helicobacter canadensis              |
| 1 | Cellular_org | Helicobacter canadensis MIT 98-5491  |
| 1 | Cellular_org | Helicobacter cinaedi                 |
| 1 | Cellular_org | Helicobacter cinaedi CCUG 18818      |
| 1 | Cellular_org | Helicobacter felis                   |
| 1 | Cellular_org | Helicobacter hepaticus               |
| 1 | Cellular_org | Helicobacter hepaticus ATCC 51449    |
| 1 | Cellular_org | Helicobacter mustelae                |
| 1 | Cellular_org | Helicobacter mustelae 12198          |
| 1 | Cellular_org | Helicobacter pullorum                |
| 1 | Cellular_org | Helicobacter pullorum MIT 98-5489    |
| 1 | Cellular_org | Helicobacter pylori                  |
| 1 | Cellular_org | Helicobacter pylori 26695            |
| 1 | Cellular_org | Helicobacter pylori 98-10            |
| 1 | Cellular_org | Helicobacter pylori B128             |
| 1 | Cellular_org | Helicobacter pylori B38              |
| 1 | Cellular_org | Helicobacter pylori B8               |
| 1 | Cellular_org | Helicobacter pylori G27              |
| 1 | Cellular_org | Helicobacter pylori HPAG1            |
| 1 | Cellular_org | Helicobacter pylori HPKX_438_AG0C1   |
| 1 | Cellular_org | Helicobacter pylori HPKX_438_CA4C1   |
| 1 | Cellular_org | Helicobacter pylori J99              |
| 1 | Cellular_org | Helicobacter pylori P12              |
| 1 | Cellular_org | Helicobacter pylori PeCan4           |

|   |              |                                                |
|---|--------------|------------------------------------------------|
| 1 | Cellular_org | <i>Helicobacter pylori</i> SJM180              |
| 1 | Cellular_org | <i>Helicobacter pylori</i> Shi470              |
| 1 | Cellular_org | <i>Helicobacter suis</i>                       |
| 1 | Cellular_org | <i>Helicobacter suis</i> HS1                   |
| 1 | Cellular_org | <i>Helicobacter winghamensis</i>               |
| 1 | Cellular_org | <i>Helicobacter winghamensis</i> ATCC BAA-430  |
| 1 | Cellular_org | <i>Heliobacterium modesticaldum</i>            |
| 1 | Cellular_org | <i>Heliobacterium modesticaldum</i> Ice1       |
| 1 | Cellular_org | <i>Herbaspirillum seropedicae</i>              |
| 1 | Cellular_org | <i>Herbaspirillum seropedicae</i> SmR1         |
| 1 | Cellular_org | <i>Herminiimonas arsenicoxydans</i>            |
| 1 | Cellular_org | <i>Herpetosiphon aurantiacus</i>               |
| 1 | Cellular_org | <i>Herpetosiphon aurantiacus</i> ATCC 23779    |
| 1 | Cellular_org | <i>Hirschia baltica</i> ATCC 49814             |
| 1 | Cellular_org | <i>Histophilus somni</i>                       |
| 1 | Cellular_org | <i>Hoeflea phototrophica</i> DFL-43            |
| 1 | Cellular_org | <i>Holdemania filiformis</i> DSM 12042         |
| 1 | Cellular_org | <i>Hydrogenivirga</i> sp. 128-5-R1-1           |
| 1 | Cellular_org | <i>Hydrogenobacter thermophilus</i>            |
| 1 | Cellular_org | <i>Hydrogenobacter thermophilus</i> TK-6       |
| 1 | Cellular_org | <i>Hydrogenobaculum</i> sp. Y04AAS1            |
| 1 | Cellular_org | <i>Hyphomicrobium denitrificans</i>            |
| 1 | Cellular_org | <i>Hyphomicrobium denitrificans</i> ATCC 51888 |
| 1 | Cellular_org | <i>Hyphomonas neptunium</i>                    |
| 1 | Cellular_org | <i>Hyphomonas neptunium</i> ATCC 15444         |
| 1 | Cellular_org | <i>Idiomarina baltica</i>                      |
| 1 | Cellular_org | <i>Idiomarina baltica</i> OS145                |
| 1 | Cellular_org | <i>Idiomarina loihiensis</i> L2TR              |
| 1 | Cellular_org | <i>Ilyobacter polytropus</i> DSM 2926          |
| 1 | Cellular_org | <i>Isosphaera pallida</i> ATCC 43644           |
| 1 | Cellular_org | <i>Janibacter</i> sp. HTCC2649                 |
| 1 | Cellular_org | <i>Jannaschia</i> sp. CCS1                     |
| 1 | Cellular_org | <i>Janthinobacterium</i> sp. Marseille         |
| 1 | Cellular_org | <i>Jonesia denitrificans</i> DSM 20603         |
| 1 | Cellular_org | <i>Jonquetella anthropi</i> E3_33 E1           |
| 1 | Cellular_org | <i>Kangiella koreensis</i> DSM 16069           |
| 1 | Cellular_org | <i>Ketogulonicigenium vulgare</i>              |
| 1 | Cellular_org | <i>Ketogulonicigenium vulgare</i> Y25          |
| 1 | Cellular_org | <i>Kineococcus radiotolerans</i> SRS30216      |
| 1 | Cellular_org | <i>Kingella oralis</i> ATCC 51147              |
| 1 | Cellular_org | <i>Klebsiella oxytoca</i>                      |
| 1 | Cellular_org | <i>Klebsiella oxytoca</i> KOX105               |
| 1 | Cellular_org | <i>Klebsiella pneumoniae</i>                   |

|   |              |                                                                        |
|---|--------------|------------------------------------------------------------------------|
| 1 | Cellular_org | <i>Klebsiella pneumoniae</i> 342                                       |
| 1 | Cellular_org | <i>Klebsiella pneumoniae</i> NTUH-K2044                                |
| 1 | Cellular_org | <i>Klebsiella pneumoniae</i> subsp. <i>pneumoniae</i>                  |
| 1 | Cellular_org | <i>Klebsiella pneumoniae</i> subsp. <i>pneumoniae</i> MGH 78578        |
| 1 | Cellular_org | <i>Klebsiella pneumoniae</i> subsp. <i>rhinoscleromatis</i>            |
| 1 | Cellular_org | <i>Klebsiella pneumoniae</i> subsp. <i>rhinoscleromatis</i> ATCC 13884 |
| 1 | Cellular_org | <i>Klebsiella</i> sp. 1_1_55                                           |
| 1 | Cellular_org | <i>Klebsiella</i> sp. KCL-2                                            |
| 1 | Cellular_org | <i>Klebsiella variicola</i>                                            |
| 1 | Cellular_org | <i>Klebsiella variicola</i> At-22                                      |
| 1 | Cellular_org | <i>Kocuria rhizophila</i>                                              |
| 1 | Cellular_org | <i>Kocuria rhizophila</i> DC2201                                       |
| 1 | Cellular_org | <i>Kordia algicida</i> OT-1                                            |
| 1 | Cellular_org | <i>Kosmotoga olearia</i> TBF 19.5.1                                    |
| 1 | Cellular_org | <i>Kribbella flavida</i>                                               |
| 1 | Cellular_org | <i>Kribbella flavida</i> DSM 17836                                     |
| 1 | Cellular_org | <i>Ktedonobacter racemifer</i> DSM 44963                               |
| 1 | Cellular_org | <i>Kytococcus sedentarius</i>                                          |
| 1 | Cellular_org | <i>Kytococcus sedentarius</i> DSM 20547                                |
| 1 | Cellular_org | <i>Labrenzia aggregata</i>                                             |
| 1 | Cellular_org | <i>Labrenzia alexandrii</i> DFL-11                                     |
| 1 | Cellular_org | <i>Lactobacillus acidipiscis</i>                                       |
| 1 | Cellular_org | <i>Lactobacillus acidophilus</i>                                       |
| 1 | Cellular_org | <i>Lactobacillus acidophilus</i> ATCC 4796                             |
| 1 | Cellular_org | <i>Lactobacillus acidophilus</i> NCFM                                  |
| 1 | Cellular_org | <i>Lactobacillus amylolyticus</i>                                      |
| 1 | Cellular_org | <i>Lactobacillus amylolyticus</i> DSM 11664                            |
| 1 | Cellular_org | <i>Lactobacillus amylovorus</i>                                        |
| 1 | Cellular_org | <i>Lactobacillus antri</i>                                             |
| 1 | Cellular_org | <i>Lactobacillus antri</i> DSM 16041                                   |
| 1 | Cellular_org | <i>Lactobacillus brevis</i>                                            |
| 1 | Cellular_org | <i>Lactobacillus brevis</i> ATCC 367                                   |
| 1 | Cellular_org | <i>Lactobacillus brevis</i> subsp. <i>gravesensis</i> ATCC 27305       |
| 1 | Cellular_org | <i>Lactobacillus buchneri</i>                                          |
| 1 | Cellular_org | <i>Lactobacillus buchneri</i> ATCC 11577                               |
| 1 | Cellular_org | <i>Lactobacillus casei</i>                                             |
| 1 | Cellular_org | <i>Lactobacillus casei</i> ATCC 334                                    |
| 1 | Cellular_org | <i>Lactobacillus casei</i> BL23                                        |
| 1 | Cellular_org | <i>Lactobacillus casei</i> str. Zhang                                  |
| 1 | Cellular_org | <i>Lactobacillus coleohominis</i>                                      |
| 1 | Cellular_org | <i>Lactobacillus coleohominis</i> 101-4-CHN                            |
| 1 | Cellular_org | <i>Lactobacillus crispatus</i>                                         |

|   |              |                                                             |
|---|--------------|-------------------------------------------------------------|
| 1 | Cellular_org | Lactobacillus crispatus 125-2-CHN                           |
| 1 | Cellular_org | Lactobacillus crispatus 214-1                               |
| 1 | Cellular_org | Lactobacillus crispatus JV-V01                              |
| 1 | Cellular_org | Lactobacillus crispatus MV-1A-US                            |
| 1 | Cellular_org | Lactobacillus crispatus MV-3A-US                            |
| 1 | Cellular_org | Lactobacillus crispatus ST1                                 |
| 1 | Cellular_org | Lactobacillus curvatus                                      |
| 1 | Cellular_org | Lactobacillus delbrueckii                                   |
| 1 | Cellular_org | Lactobacillus delbrueckii subsp. bulgaricus                 |
| 1 | Cellular_org | Lactobacillus delbrueckii subsp. bulgaricus ATCC 11842      |
| 1 | Cellular_org | Lactobacillus delbrueckii subsp. bulgaricus ATCC BAA-365    |
| 1 | Cellular_org | Lactobacillus delbrueckii subsp. bulgaricus PB2003/044-T3-4 |
| 1 | Cellular_org | Lactobacillus delbrueckii subsp. lactis                     |
| 1 | Cellular_org | Lactobacillus farciminis                                    |
| 1 | Cellular_org | Lactobacillus fermentum                                     |
| 1 | Cellular_org | Lactobacillus fermentum 28-3-CHN                            |
| 1 | Cellular_org | Lactobacillus fermentum ATCC 14931                          |
| 1 | Cellular_org | Lactobacillus fermentum IFO 3956                            |
| 1 | Cellular_org | Lactobacillus gasseri                                       |
| 1 | Cellular_org | Lactobacillus gasseri 202-4                                 |
| 1 | Cellular_org | Lactobacillus gasseri 224-1                                 |
| 1 | Cellular_org | Lactobacillus gasseri ATCC 33323                            |
| 1 | Cellular_org | Lactobacillus gasseri JV-V03                                |
| 1 | Cellular_org | Lactobacillus gasseri MV-22                                 |
| 1 | Cellular_org | Lactobacillus helveticus                                    |
| 1 | Cellular_org | Lactobacillus helveticus DPC 4571                           |
| 1 | Cellular_org | Lactobacillus helveticus DSM 20075                          |
| 1 | Cellular_org | Lactobacillus helveticus subsp. jugurti                     |
| 1 | Cellular_org | Lactobacillus hilgardii                                     |
| 1 | Cellular_org | Lactobacillus hilgardii ATCC 8290                           |
| 1 | Cellular_org | Lactobacillus iners                                         |
| 1 | Cellular_org | Lactobacillus iners AB-1                                    |
| 1 | Cellular_org | Lactobacillus iners DSM 13335                               |
| 1 | Cellular_org | Lactobacillus iners LactinV 01V1-a                          |
| 1 | Cellular_org | Lactobacillus iners LactinV 03V1-b                          |
| 1 | Cellular_org | Lactobacillus iners LactinV 09V1-c                          |
| 1 | Cellular_org | Lactobacillus iners LactinV 11V1-d                          |
| 1 | Cellular_org | Lactobacillus iners SPIN 2503V10-D                          |
| 1 | Cellular_org | Lactobacillus jensenii                                      |
| 1 | Cellular_org | Lactobacillus jensenii 115-3-CHN                            |
| 1 | Cellular_org | Lactobacillus jensenii 1153                                 |
| 1 | Cellular_org | Lactobacillus jensenii 208-1                                |

|   |              |                                                     |
|---|--------------|-----------------------------------------------------|
| 1 | Cellular_org | Lactobacillus jensenii 269-3                        |
| 1 | Cellular_org | Lactobacillus jensenii 27-2-CHN                     |
| 1 | Cellular_org | Lactobacillus jensenii JV-V16                       |
| 1 | Cellular_org | Lactobacillus jensenii SJ-7A-US                     |
| 1 | Cellular_org | Lactobacillus johnsonii                             |
| 1 | Cellular_org | Lactobacillus johnsonii ATCC 33200                  |
| 1 | Cellular_org | Lactobacillus johnsonii FI9785                      |
| 1 | Cellular_org | Lactobacillus johnsonii NCC 533                     |
| 1 | Cellular_org | Lactobacillus oris                                  |
| 1 | Cellular_org | Lactobacillus paracasei                             |
| 1 | Cellular_org | Lactobacillus paracasei TXW                         |
| 1 | Cellular_org | Lactobacillus paracasei subsp. paracasei            |
| 1 | Cellular_org | Lactobacillus paracasei subsp. paracasei 8700:2     |
| 1 | Cellular_org | Lactobacillus paracasei subsp. paracasei ATCC 25302 |
| 1 | Cellular_org | Lactobacillus pentosus                              |
| 1 | Cellular_org | Lactobacillus plantarum                             |
| 1 | Cellular_org | Lactobacillus plantarum JDM1                        |
| 1 | Cellular_org | Lactobacillus plantarum WCFS1                       |
| 1 | Cellular_org | Lactobacillus plantarum subsp. plantarum            |
| 1 | Cellular_org | Lactobacillus plantarum subsp. plantarum ATCC 14917 |
| 1 | Cellular_org | Lactobacillus plantarum subsp. plantarum ST-III     |
| 1 | Cellular_org | Lactobacillus reuteri                               |
| 1 | Cellular_org | Lactobacillus reuteri 100-23                        |
| 1 | Cellular_org | Lactobacillus reuteri CF48-3A                       |
| 1 | Cellular_org | Lactobacillus reuteri DSM 20016                     |
| 1 | Cellular_org | Lactobacillus reuteri JCM 1112                      |
| 1 | Cellular_org | Lactobacillus reuteri MM2-3                         |
| 1 | Cellular_org | Lactobacillus reuteri MM4-1A                        |
| 1 | Cellular_org | Lactobacillus reuteri SD2112                        |
| 1 | Cellular_org | Lactobacillus rhamnosus                             |
| 1 | Cellular_org | Lactobacillus rhamnosus GG                          |
| 1 | Cellular_org | Lactobacillus rhamnosus HN001                       |
| 1 | Cellular_org | Lactobacillus rhamnosus LMS2-1                      |
| 1 | Cellular_org | Lactobacillus rhamnosus Lc 705                      |
| 1 | Cellular_org | Lactobacillus ruminis                               |
| 1 | Cellular_org | Lactobacillus ruminis ATCC 25644                    |
| 1 | Cellular_org | Lactobacillus sakei                                 |
| 1 | Cellular_org | Lactobacillus sakei subsp. sakei                    |
| 1 | Cellular_org | Lactobacillus sakei subsp. sakei 23K                |
| 1 | Cellular_org | Lactobacillus salivarius                            |
| 1 | Cellular_org | Lactobacillus salivarius ACS-116-V-Col5a            |
| 1 | Cellular_org | Lactobacillus salivarius ATCC 11741                 |
| 1 | Cellular_org | Lactobacillus salivarius UCC118                     |

|   |              |                                                               |
|---|--------------|---------------------------------------------------------------|
| 1 | Cellular_org | Lactobacillus ultunensis                                      |
| 1 | Cellular_org | Lactobacillus ultunensis DSM 16047                            |
| 1 | Cellular_org | Lactobacillus vaginalis                                       |
| 1 | Cellular_org | Lactobacillus vaginalis ATCC 49540                            |
| 1 | Cellular_org | Lactococcus garvieae                                          |
| 1 | Cellular_org | Lactococcus lactis                                            |
| 1 | Cellular_org | Lactococcus lactis subsp. cremoris                            |
| 1 | Cellular_org | Lactococcus lactis subsp. cremoris MG1363                     |
| 1 | Cellular_org | Lactococcus lactis subsp. cremoris SK11                       |
| 1 | Cellular_org | Lactococcus lactis subsp. lactis                              |
| 1 | Cellular_org | Lactococcus lactis subsp. lactis II1403                       |
| 1 | Cellular_org | Lactococcus lactis subsp. lactis K214                         |
| 1 | Cellular_org | Lactococcus lactis subsp. lactis KF147                        |
| 1 | Cellular_org | Lactococcus lactis subsp. lactis bv. diacetylactis            |
| 1 | Cellular_org | Laribacter hongkongensis                                      |
| 1 | Cellular_org | Laribacter hongkongensis HLHK9                                |
| 1 | Cellular_org | Lawsonia intracellularis                                      |
| 1 | Cellular_org | Lawsonia intracellularis PHE/MN1-00                           |
| 1 | Cellular_org | Leeuwenhoekella blandensis MED217                             |
| 1 | Cellular_org | Legionella drancourtii                                        |
| 1 | Cellular_org | Legionella drancourtii LLAP12                                 |
| 1 | Cellular_org | Legionella longbeachae                                        |
| 1 | Cellular_org | Legionella longbeachae D-4968                                 |
| 1 | Cellular_org | Legionella longbeachae NSW150                                 |
| 1 | Cellular_org | Legionella pneumophila                                        |
| 1 | Cellular_org | Legionella pneumophila 2300/99 Alcoy                          |
| 1 | Cellular_org | Legionella pneumophila serogroup 1                            |
| 1 | Cellular_org | Legionella pneumophila str. Corby                             |
| 1 | Cellular_org | Legionella pneumophila str. Lens                              |
| 1 | Cellular_org | Legionella pneumophila str. Paris                             |
| 1 | Cellular_org | Legionella pneumophila subsp. pneumophila                     |
| 1 | Cellular_org | Legionella pneumophila subsp. pneumophila str. Philadelphia 1 |
| 1 | Cellular_org | Leifsonia xyli                                                |
| 1 | Cellular_org | Leifsonia xyli subsp. xyli                                    |
| 1 | Cellular_org | Leifsonia xyli subsp. xyli str. CTCB07                        |
| 1 | Cellular_org | Lentisphaera araneosa HTCC2155                                |
| 1 | Cellular_org | Leptolyngbya boryana                                          |
| 1 | Cellular_org | Leptolyngbya foveolarum                                       |
| 1 | Cellular_org | Leptolyngbya sp. PCC 6402                                     |
| 1 | Cellular_org | Leptolyngbya valderiana BDU 20041                             |
| 1 | Cellular_org | Leptospira biflexa                                            |
| 1 | Cellular_org | Leptospira biflexa serovar Patoc                              |

|   |              |                                                                        |
|---|--------------|------------------------------------------------------------------------|
| 1 | Cellular_org | <i>Leptospira biflexa</i> serovar Patoc strain 'Patoc 1 (Ames)'        |
| 1 | Cellular_org | <i>Leptospira biflexa</i> serovar Patoc strain 'Patoc 1 (Paris)'       |
| 1 | Cellular_org | <i>Leptospira borgpetersenii</i>                                       |
| 1 | Cellular_org | <i>Leptospira borgpetersenii</i> serovar Hardjo-bovis                  |
| 1 | Cellular_org | <i>Leptospira borgpetersenii</i> serovar Hardjo-bovis JB197            |
| 1 | Cellular_org | <i>Leptospira borgpetersenii</i> serovar Hardjo-bovis L550             |
| 1 | Cellular_org | <i>Leptospira interrogans</i>                                          |
| 1 | Cellular_org | <i>Leptospira interrogans</i> serovar Copenhageni                      |
| 1 | Cellular_org | <i>Leptospira interrogans</i> serovar Copenhageni str. Fiocruz L1-130  |
| 1 | Cellular_org | <i>Leptospira interrogans</i> serovar Lai                              |
| 1 | Cellular_org | <i>Leptospira interrogans</i> serovar Lai str. 56601                   |
| 1 | Cellular_org | <i>Leptospirillum ferrooxidans</i>                                     |
| 1 | Cellular_org | <i>Leptothrix cholodnii</i>                                            |
| 1 | Cellular_org | <i>Leptothrix cholodnii</i> SP-6                                       |
| 1 | Cellular_org | <i>Leptotrichia buccalis</i>                                           |
| 1 | Cellular_org | <i>Leptotrichia buccalis</i> C-1013-b                                  |
| 1 | Cellular_org | <i>Leptotrichia goodfellowii</i> F0264                                 |
| 1 | Cellular_org | <i>Leptotrichia hofstadii</i> F0254                                    |
| 1 | Cellular_org | <i>Leuconostoc citreum</i>                                             |
| 1 | Cellular_org | <i>Leuconostoc citreum</i> KM20                                        |
| 1 | Cellular_org | <i>Leuconostoc gasicomitatum</i>                                       |
| 1 | Cellular_org | <i>Leuconostoc gasicomitatum</i> LMG 18811                             |
| 1 | Cellular_org | <i>Leuconostoc kimchii</i>                                             |
| 1 | Cellular_org | <i>Leuconostoc kimchii</i> IMSNU 11154                                 |
| 1 | Cellular_org | <i>Leuconostoc mesenteroides</i>                                       |
| 1 | Cellular_org | <i>Leuconostoc mesenteroides</i> subsp. <i>cremoris</i>                |
| 1 | Cellular_org | <i>Leuconostoc mesenteroides</i> subsp. <i>cremoris</i> ATCC 19254     |
| 1 | Cellular_org | <i>Leuconostoc mesenteroides</i> subsp. <i>mesenteroides</i>           |
| 1 | Cellular_org | <i>Leuconostoc mesenteroides</i> subsp. <i>mesenteroides</i> ATCC 8293 |
| 1 | Cellular_org | <i>Leuconostoc mesenteroides</i> subsp. <i>mesenteroides</i> Y110      |
| 1 | Cellular_org | <i>Limnobacter</i> sp. MED105                                          |
| 1 | Cellular_org | <i>Listeria grayi</i>                                                  |
| 1 | Cellular_org | <i>Listeria grayi</i> DSM 20601                                        |
| 1 | Cellular_org | <i>Listeria innocua</i>                                                |
| 1 | Cellular_org | <i>Listeria innocua</i> Clip11262                                      |
| 1 | Cellular_org | <i>Listeria ivanovii</i>                                               |
| 1 | Cellular_org | <i>Listeria marthii</i>                                                |
| 1 | Cellular_org | <i>Listeria monocytogenes</i>                                          |
| 1 | Cellular_org | <i>Listeria monocytogenes</i> 08-5578                                  |
| 1 | Cellular_org | <i>Listeria monocytogenes</i> 08-5923                                  |
| 1 | Cellular_org | <i>Listeria monocytogenes</i> 10403S                                   |



|   |              |                                               |
|---|--------------|-----------------------------------------------|
| 1 | Cellular_org | Listeria monocytogenes EGD-e                  |
| 1 | Cellular_org | Listeria monocytogenes F6900                  |
| 1 | Cellular_org | Listeria monocytogenes FSL F2-515             |
| 1 | Cellular_org | Listeria monocytogenes FSL J1-175             |
| 1 | Cellular_org | Listeria monocytogenes FSL J1-194             |
| 1 | Cellular_org | Listeria monocytogenes FSL J1-208             |
| 1 | Cellular_org | Listeria monocytogenes FSL J2-003             |
| 1 | Cellular_org | Listeria monocytogenes FSL J2-064             |
| 1 | Cellular_org | Listeria monocytogenes FSL J2-071             |
| 1 | Cellular_org | Listeria monocytogenes FSL N1-017             |
| 1 | Cellular_org | Listeria monocytogenes FSL N3-165             |
| 1 | Cellular_org | Listeria monocytogenes FSL R2-503             |
| 1 | Cellular_org | Listeria monocytogenes FSL R2-561             |
| 1 | Cellular_org | Listeria monocytogenes Finland 1988           |
| 1 | Cellular_org | Listeria monocytogenes HCC23                  |
| 1 | Cellular_org | Listeria monocytogenes HPB2262                |
| 1 | Cellular_org | Listeria monocytogenes J0161                  |
| 1 | Cellular_org | Listeria monocytogenes J2818                  |
| 1 | Cellular_org | Listeria monocytogenes LO28                   |
| 1 | Cellular_org | Listeria monocytogenes serotype 4b str. F2365 |
| 1 | Cellular_org | Listeria seeligeri                            |
| 1 | Cellular_org | Listeria seeligeri serovar 1/2b str. SLCC3954 |
| 1 | Cellular_org | Listeria welshimeri                           |
| 1 | Cellular_org | Listeria welshimeri serovar 6b str. SLCC5334  |
| 1 | Cellular_org | Listonella anguillarum                        |
| 1 | Cellular_org | Listonella anguillarum 775                    |
| 1 | Cellular_org | Listonella anguillarum serovar O2             |
| 1 | Cellular_org | Loktanella vestfoldensis                      |
| 1 | Cellular_org | Loktanella vestfoldensis SKA53                |
| 1 | Cellular_org | Lutiella nitroferrum 2002                     |
| 1 | Cellular_org | Lyngbya sp. PCC 8106                          |
| 1 | Cellular_org | Lysinibacillus fusiformis                     |
| 1 | Cellular_org | Lysinibacillus fusiformis ZC1                 |
| 1 | Cellular_org | Lysinibacillus sphaericus                     |
| 1 | Cellular_org | Lysinibacillus sphaericus C3-41               |
| 1 | Cellular_org | Macrocooccus caseolyticus                     |
| 1 | Cellular_org | Macrocooccus caseolyticus JCSC5402            |
| 1 | Cellular_org | Magnetococcus sp. MC-1                        |
| 1 | Cellular_org | Magnetospirillum gryphiswaldense              |
| 1 | Cellular_org | Magnetospirillum gryphiswaldense MSR-1        |
| 1 | Cellular_org | Magnetospirillum magneticum                   |
| 1 | Cellular_org | Magnetospirillum magneticum AMB-1             |
| 1 | Cellular_org | Magnetospirillum magnetotacticum              |

|   |              |                                                |
|---|--------------|------------------------------------------------|
| 1 | Cellular_org | Magnetospirillum magnetotacticum MS-1          |
| 1 | Cellular_org | Mannheimia haemolytica                         |
| 1 | Cellular_org | Mannheimia haemolytica PHL213                  |
| 1 | Cellular_org | Mannheimia haemolytica serotype A2 str. BOVINE |
| 1 | Cellular_org | Mannheimia haemolytica serotype A2 str. OVINE  |
| 1 | Cellular_org | Mannheimia succiniciproducens MBEL55E          |
| 1 | Cellular_org | Mannheimia varigena                            |
| 1 | Cellular_org | Maricaulis maris                               |
| 1 | Cellular_org | Maricaulis maris MCS10                         |
| 1 | Cellular_org | Marinobacter algicola DG893                    |
| 1 | Cellular_org | Marinobacter aquaeolei VT8                     |
| 1 | Cellular_org | Marinobacter hydrocarbonoclasticus             |
| 1 | Cellular_org | Marinobacter sp. ELB17                         |
| 1 | Cellular_org | Marinococcus halophilus                        |
| 1 | Cellular_org | Marinomonas sp. MED121                         |
| 1 | Cellular_org | Marinomonas sp. MWYL1                          |
| 1 | Cellular_org | Mariprofundus ferrooxydans PV-1                |
| 1 | Cellular_org | Maritimibacter alkaliphilus HTCC2654           |
| 1 | Cellular_org | Megasphaera genomosp. type_1 str. 28L          |
| 1 | Cellular_org | Megasphaera micronuciformis                    |
| 1 | Cellular_org | Megasphaera micronuciformis F0359              |
| 1 | Cellular_org | Meiothermus ruber                              |
| 1 | Cellular_org | Meiothermus ruber DSM 1279                     |
| 1 | Cellular_org | Meiothermus silvanus DSM 9946                  |
| 1 | Cellular_org | Mesoplasma florum                              |
| 1 | Cellular_org | Mesoplasma florum L1                           |
| 1 | Cellular_org | Mesorhizobium ciceri                           |
| 1 | Cellular_org | Mesorhizobium ciceri biovar biserrulae         |
| 1 | Cellular_org | Mesorhizobium loti                             |
| 1 | Cellular_org | Mesorhizobium loti MAFF303099                  |
| 1 | Cellular_org | Mesorhizobium opportunistum                    |
| 1 | Cellular_org | Mesorhizobium opportunistum WSM2075            |
| 1 | Cellular_org | Methylacidiphilum infernorum V4                |
| 1 | Cellular_org | Methylibium petroleiphilum PM1                 |
| 1 | Cellular_org | Methylobacillus flagellatus                    |
| 1 | Cellular_org | Methylobacillus flagellatus KT                 |
| 1 | Cellular_org | Methylobacter tundripaludum                    |
| 1 | Cellular_org | Methylobacter tundripaludum SV96               |
| 1 | Cellular_org | Methylobacterium chloromethanicum              |
| 1 | Cellular_org | Methylobacterium chloromethanicum CM4          |
| 1 | Cellular_org | Methylobacterium extorquens                    |
| 1 | Cellular_org | Methylobacterium extorquens AM1                |
| 1 | Cellular_org | Methylobacterium extorquens DM4                |

|   |              |                                                |
|---|--------------|------------------------------------------------|
| 1 | Cellular_org | Methylobacterium extorquens PA1                |
| 1 | Cellular_org | Methylobacterium nodulans                      |
| 1 | Cellular_org | Methylobacterium nodulans ORS 2060             |
| 1 | Cellular_org | Methylobacterium populi BJ001                  |
| 1 | Cellular_org | Methylobacterium radiotolerans                 |
| 1 | Cellular_org | Methylobacterium radiotolerans JCM 2831        |
| 1 | Cellular_org | Methylobacterium sp. 4-46                      |
| 1 | Cellular_org | Methylocella silvestris                        |
| 1 | Cellular_org | Methylocella silvestris BL2                    |
| 1 | Cellular_org | Methylococcus capsulatus                       |
| 1 | Cellular_org | Methylococcus capsulatus str. Bath             |
| 1 | Cellular_org | Methylocystis sp. ATCC 49242                   |
| 1 | Cellular_org | Methylophaga thalassica                        |
| 1 | Cellular_org | Methylophilales bacterium HTCC2181             |
| 1 | Cellular_org | Methylosinus trichosporium                     |
| 1 | Cellular_org | Methylosinus trichosporium OB3b                |
| 1 | Cellular_org | Methylotenera mobilis JLW8                     |
| 1 | Cellular_org | Methylotenera sp. 301                          |
| 1 | Cellular_org | Methylovorus sp. SIP3-4                        |
| 1 | Cellular_org | Microbacterium testaceum                       |
| 1 | Cellular_org | Micrococcus luteus                             |
| 1 | Cellular_org | Micrococcus luteus NCTC 2665                   |
| 1 | Cellular_org | Micrococcus luteus SK58                        |
| 1 | Cellular_org | Micrococcus sp. 28                             |
| 1 | Cellular_org | Microcoleus chthonoplastes                     |
| 1 | Cellular_org | Microcoleus chthonoplastes PCC 7420            |
| 1 | Cellular_org | Microcystis                                    |
| 1 | Cellular_org | Microcystis aeruginosa                         |
| 1 | Cellular_org | Microcystis aeruginosa NIES-843                |
| 1 | Cellular_org | Micromonospora aurantiaca                      |
| 1 | Cellular_org | Micromonospora aurantiaca ATCC 27029           |
| 1 | Cellular_org | Micromonospora rosaria                         |
| 1 | Cellular_org | Micromonospora sp. ATCC 39149                  |
| 1 | Cellular_org | Micromonospora sp. L5                          |
| 1 | Cellular_org | Microscilla marina                             |
| 1 | Cellular_org | Microscilla marina ATCC 23134                  |
| 1 | Cellular_org | Microscilla sp. PRE1                           |
| 1 | Cellular_org | Mitsuokella multacida                          |
| 1 | Cellular_org | Mitsuokella multacida DSM 20544                |
| 1 | Cellular_org | Mobiluncus curtisii                            |
| 1 | Cellular_org | Mobiluncus curtisii ATCC 43063                 |
| 1 | Cellular_org | Mobiluncus curtisii subsp. curtisii            |
| 1 | Cellular_org | Mobiluncus curtisii subsp. curtisii ATCC 35241 |

|   |              |                                                  |
|---|--------------|--------------------------------------------------|
| 1 | Cellular_org | Mobiluncus curtisii subsp. holmesii              |
| 1 | Cellular_org | Mobiluncus mulieris 28-1                         |
| 1 | Cellular_org | Mobiluncus mulieris ATCC 35239                   |
| 1 | Cellular_org | Mobiluncus mulieris ATCC 35243                   |
| 1 | Cellular_org | Mobiluncus mulieris FB024-16                     |
| 1 | Cellular_org | Moorella thermoacetica                           |
| 1 | Cellular_org | Moorella thermoacetica ATCC 39073                |
| 1 | Cellular_org | Moraxella bovis                                  |
| 1 | Cellular_org | Moraxella bovis Epp63                            |
| 1 | Cellular_org | Moraxella catarrhalis                            |
| 1 | Cellular_org | Moraxella catarrhalis RH4                        |
| 1 | Cellular_org | Moraxella sp. TA144                              |
| 1 | Cellular_org | Moritella sp. PE36                               |
| 1 | Cellular_org | Mycobacterium abscessus                          |
| 1 | Cellular_org | Mycobacterium abscessus ATCC 19977               |
| 1 | Cellular_org | Mycobacterium avium                              |
| 1 | Cellular_org | Mycobacterium avium 104                          |
| 1 | Cellular_org | Mycobacterium avium subsp. avium                 |
| 1 | Cellular_org | Mycobacterium avium subsp. avium ATCC 25291      |
| 1 | Cellular_org | Mycobacterium avium subsp. paratuberculosis      |
| 1 | Cellular_org | Mycobacterium avium subsp. paratuberculosis K-10 |
| 1 | Cellular_org | Mycobacterium bovis                              |
| 1 | Cellular_org | Mycobacterium bovis AF2122/97                    |
| 1 | Cellular_org | Mycobacterium bovis BCG                          |
| 1 | Cellular_org | Mycobacterium bovis BCG str. Pasteur 1173P2      |
| 1 | Cellular_org | Mycobacterium bovis BCG str. Tokyo 172           |
| 1 | Cellular_org | Mycobacterium celatum                            |
| 1 | Cellular_org | Mycobacterium gilvum                             |
| 1 | Cellular_org | Mycobacterium gilvum PYR-GCK                     |
| 1 | Cellular_org | Mycobacterium intracellulare                     |
| 1 | Cellular_org | Mycobacterium intracellulare ATCC 13950          |
| 1 | Cellular_org | Mycobacterium kansasii                           |
| 1 | Cellular_org | Mycobacterium kansasii ATCC 12478                |
| 1 | Cellular_org | Mycobacterium leprae                             |
| 1 | Cellular_org | Mycobacterium leprae Br4923                      |
| 1 | Cellular_org | Mycobacterium leprae TN                          |
| 1 | Cellular_org | Mycobacterium liflandii                          |
| 1 | Cellular_org | Mycobacterium liflandii 128FXT                   |
| 1 | Cellular_org | Mycobacterium marinum                            |
| 1 | Cellular_org | Mycobacterium marinum M                          |
| 1 | Cellular_org | Mycobacterium parascrofulaceum                   |
| 1 | Cellular_org | Mycobacterium parascrofulaceum ATCC BAA-614      |
| 1 | Cellular_org | Mycobacterium smegmatis                          |

|   |              |                                                 |
|---|--------------|-------------------------------------------------|
| 1 | Cellular_org | Mycobacterium smegmatis str. MC2 155            |
| 1 | Cellular_org | Mycobacterium sp. JLS                           |
| 1 | Cellular_org | Mycobacterium sp. KMS                           |
| 1 | Cellular_org | Mycobacterium sp. MCS                           |
| 1 | Cellular_org | Mycobacterium sp. Spyr1                         |
| 1 | Cellular_org | Mycobacterium tuberculosis                      |
| 1 | Cellular_org | Mycobacterium tuberculosis '98-R604 INH-RIF-EM' |
| 1 | Cellular_org | Mycobacterium tuberculosis 02_1987              |
| 1 | Cellular_org | Mycobacterium tuberculosis 210                  |
| 1 | Cellular_org | Mycobacterium tuberculosis 94_M4241A            |
| 1 | Cellular_org | Mycobacterium tuberculosis C                    |
| 1 | Cellular_org | Mycobacterium tuberculosis CDC1551              |
| 1 | Cellular_org | Mycobacterium tuberculosis CPHL_A               |
| 1 | Cellular_org | Mycobacterium tuberculosis EAS054               |
| 1 | Cellular_org | Mycobacterium tuberculosis F11                  |
| 1 | Cellular_org | Mycobacterium tuberculosis GM 1503              |
| 1 | Cellular_org | Mycobacterium tuberculosis H37Ra                |
| 1 | Cellular_org | Mycobacterium tuberculosis H37Rv                |
| 1 | Cellular_org | Mycobacterium tuberculosis K85                  |
| 1 | Cellular_org | Mycobacterium tuberculosis KZN 1435             |
| 1 | Cellular_org | Mycobacterium tuberculosis KZN 4207             |
| 1 | Cellular_org | Mycobacterium tuberculosis KZN 605              |
| 1 | Cellular_org | Mycobacterium tuberculosis KZN R506             |
| 1 | Cellular_org | Mycobacterium tuberculosis KZN V2475            |
| 1 | Cellular_org | Mycobacterium tuberculosis SUMu001              |
| 1 | Cellular_org | Mycobacterium tuberculosis SUMu002              |
| 1 | Cellular_org | Mycobacterium tuberculosis SUMu003              |
| 1 | Cellular_org | Mycobacterium tuberculosis SUMu004              |
| 1 | Cellular_org | Mycobacterium tuberculosis SUMu005              |
| 1 | Cellular_org | Mycobacterium tuberculosis SUMu006              |
| 1 | Cellular_org | Mycobacterium tuberculosis SUMu007              |
| 1 | Cellular_org | Mycobacterium tuberculosis SUMu008              |
| 1 | Cellular_org | Mycobacterium tuberculosis SUMu009              |
| 1 | Cellular_org | Mycobacterium tuberculosis SUMu010              |
| 1 | Cellular_org | Mycobacterium tuberculosis SUMu011              |
| 1 | Cellular_org | Mycobacterium tuberculosis SUMu012              |
| 1 | Cellular_org | Mycobacterium tuberculosis T17                  |
| 1 | Cellular_org | Mycobacterium tuberculosis T46                  |
| 1 | Cellular_org | Mycobacterium tuberculosis T85                  |
| 1 | Cellular_org | Mycobacterium tuberculosis T92                  |
| 1 | Cellular_org | Mycobacterium tuberculosis str. Haarlem         |
| 1 | Cellular_org | Mycobacterium ulcerans                          |
| 1 | Cellular_org | Mycobacterium ulcerans Agy99                    |

|   |              |                                                    |
|---|--------------|----------------------------------------------------|
| 1 | Cellular_org | Mycobacterium vanbaalenii                          |
| 1 | Cellular_org | Mycobacterium vanbaalenii PYR-1                    |
| 1 | Cellular_org | Mycoplasma agalactiae                              |
| 1 | Cellular_org | Mycoplasma agalactiae PG2                          |
| 1 | Cellular_org | Mycoplasma alligatoris A21JP2                      |
| 1 | Cellular_org | Mycoplasma arthritis                               |
| 1 | Cellular_org | Mycoplasma arthritis 158L3-1                       |
| 1 | Cellular_org | Mycoplasma bovis                                   |
| 1 | Cellular_org | Mycoplasma capricolum                              |
| 1 | Cellular_org | Mycoplasma capricolum subsp. capricolum            |
| 1 | Cellular_org | Mycoplasma capricolum subsp. capricolum ATCC 27343 |
| 1 | Cellular_org | Mycoplasma conjunctivae                            |
| 1 | Cellular_org | Mycoplasma conjunctivae HRC/581                    |
| 1 | Cellular_org | Mycoplasma crocodyli MP145                         |
| 1 | Cellular_org | Mycoplasma fermentans                              |
| 1 | Cellular_org | Mycoplasma fermentans JER                          |
| 1 | Cellular_org | Mycoplasma gallisepticum                           |
| 1 | Cellular_org | Mycoplasma gallisepticum str. R                    |
| 1 | Cellular_org | Mycoplasma gallisepticum str. R(low)               |
| 1 | Cellular_org | Mycoplasma genitalium                              |
| 1 | Cellular_org | Mycoplasma genitalium G37                          |
| 1 | Cellular_org | Mycoplasma haemofelis                              |
| 1 | Cellular_org | Mycoplasma hominis                                 |
| 1 | Cellular_org | Mycoplasma hyopneumoniae                           |
| 1 | Cellular_org | Mycoplasma hyopneumoniae 232                       |
| 1 | Cellular_org | Mycoplasma hyopneumoniae 7448                      |
| 1 | Cellular_org | Mycoplasma hyopneumoniae J                         |
| 1 | Cellular_org | Mycoplasma hyorhinis                               |
| 1 | Cellular_org | Mycoplasma hyorhinis HUB-1                         |
| 1 | Cellular_org | Mycoplasma leachii                                 |
| 1 | Cellular_org | Mycoplasma mobile                                  |
| 1 | Cellular_org | Mycoplasma mobile 163K                             |
| 1 | Cellular_org | Mycoplasma mycoides                                |
| 1 | Cellular_org | Mycoplasma mycoides subsp. mycoides                |
| 1 | Cellular_org | Mycoplasma mycoides subsp. mycoides SC             |
| 1 | Cellular_org | Mycoplasma mycoides subsp. mycoides SC str. PG1    |
| 1 | Cellular_org | Mycoplasma penetrans                               |
| 1 | Cellular_org | Mycoplasma penetrans HF-2                          |
| 1 | Cellular_org | Mycoplasma pneumoniae                              |
| 1 | Cellular_org | Mycoplasma pneumoniae M129                         |
| 1 | Cellular_org | Mycoplasma pulmonis                                |
| 1 | Cellular_org | Mycoplasma pulmonis UAB CTIP                       |
| 1 | Cellular_org | Mycoplasma suis                                    |

|   |              |                                                                |
|---|--------------|----------------------------------------------------------------|
| 1 | Cellular_org | <i>Mycoplasma synoviae</i>                                     |
| 1 | Cellular_org | <i>Mycoplasma synoviae</i> 53                                  |
| 1 | Cellular_org | <i>Mycoplasma yeatsii</i>                                      |
| 1 | Cellular_org | <i>Myxococcus fulvus</i>                                       |
| 1 | Cellular_org | <i>Myxococcus xanthus</i>                                      |
| 1 | Cellular_org | <i>Myxococcus xanthus</i> DK 1622                              |
| 1 | Cellular_org | <i>Nakamurella multipartita</i> DSM 44233                      |
| 1 | Cellular_org | <i>Natranaerobius thermophilus</i> JW/NM-WN-LF                 |
| 1 | Cellular_org | <i>Nautilia profundicola</i> AmH                               |
| 1 | Cellular_org | <i>Neisseria cinerea</i>                                       |
| 1 | Cellular_org | <i>Neisseria cinerea</i> ATCC 14685                            |
| 1 | Cellular_org | <i>Neisseria elongata</i>                                      |
| 1 | Cellular_org | <i>Neisseria elongata</i> subsp. <i>glycolytica</i> ATCC 29315 |
| 1 | Cellular_org | <i>Neisseria flavescens</i>                                    |
| 1 | Cellular_org | <i>Neisseria flavescens</i> NRL30031/H210                      |
| 1 | Cellular_org | <i>Neisseria flavescens</i> SK114                              |
| 1 | Cellular_org | <i>Neisseria gonorrhoeae</i>                                   |
| 1 | Cellular_org | <i>Neisseria gonorrhoeae</i> 1291                              |
| 1 | Cellular_org | <i>Neisseria gonorrhoeae</i> 35/02                             |
| 1 | Cellular_org | <i>Neisseria gonorrhoeae</i> DGI18                             |
| 1 | Cellular_org | <i>Neisseria gonorrhoeae</i> DGI2                              |
| 1 | Cellular_org | <i>Neisseria gonorrhoeae</i> F62                               |
| 1 | Cellular_org | <i>Neisseria gonorrhoeae</i> FA 1090                           |
| 1 | Cellular_org | <i>Neisseria gonorrhoeae</i> FA19                              |
| 1 | Cellular_org | <i>Neisseria gonorrhoeae</i> FA6140                            |
| 1 | Cellular_org | <i>Neisseria gonorrhoeae</i> MS11                              |
| 1 | Cellular_org | <i>Neisseria gonorrhoeae</i> NCCP11945                         |
| 1 | Cellular_org | <i>Neisseria gonorrhoeae</i> PID1                              |
| 1 | Cellular_org | <i>Neisseria gonorrhoeae</i> PID18                             |
| 1 | Cellular_org | <i>Neisseria gonorrhoeae</i> PID24-1                           |
| 1 | Cellular_org | <i>Neisseria gonorrhoeae</i> PID332                            |
| 1 | Cellular_org | <i>Neisseria gonorrhoeae</i> SK-92-679                         |
| 1 | Cellular_org | <i>Neisseria gonorrhoeae</i> SK-93-1035                        |
| 1 | Cellular_org | <i>Neisseria lactamica</i>                                     |
| 1 | Cellular_org | <i>Neisseria lactamica</i> ATCC 23970                          |
| 1 | Cellular_org | <i>Neisseria meningitidis</i>                                  |
| 1 | Cellular_org | <i>Neisseria meningitidis</i> 053442                           |
| 1 | Cellular_org | <i>Neisseria meningitidis</i> ATCC 13091                       |
| 1 | Cellular_org | <i>Neisseria meningitidis</i> FAM18                            |
| 1 | Cellular_org | <i>Neisseria meningitidis</i> MC58                             |
| 1 | Cellular_org | <i>Neisseria meningitidis</i> Z2491                            |
| 1 | Cellular_org | <i>Neisseria meningitidis</i> alpha14                          |
| 1 | Cellular_org | <i>Neisseria meningitidis</i> serogroup A                      |

|   |              |                                                |
|---|--------------|------------------------------------------------|
| 1 | Cellular_org | <i>Neisseria meningitidis</i> serogroup B      |
| 1 | Cellular_org | <i>Neisseria meningitidis</i> serogroup C      |
| 1 | Cellular_org | <i>Neisseria mucosa</i>                        |
| 1 | Cellular_org | <i>Neisseria mucosa</i> ATCC 25996             |
| 1 | Cellular_org | <i>Neisseria polysaccharea</i>                 |
| 1 | Cellular_org | <i>Neisseria polysaccharea</i> ATCC 43768      |
| 1 | Cellular_org | <i>Neisseria sicca</i>                         |
| 1 | Cellular_org | <i>Neisseria sicca</i> ATCC 29256              |
| 1 | Cellular_org | <i>Neisseria</i> sp. oral taxon 014 str. F0314 |
| 1 | Cellular_org | <i>Neisseria subflava</i>                      |
| 1 | Cellular_org | <i>Neisseria subflava</i> NJ9703               |
| 1 | Cellular_org | <i>Neorickettsia risticii</i> str. Illinois    |
| 1 | Cellular_org | <i>Neorickettsia sennetsu</i>                  |
| 1 | Cellular_org | <i>Neorickettsia sennetsu</i> str. Miyayama    |
| 1 | Cellular_org | <i>Nitratifactor salsuginis</i>                |
| 1 | Cellular_org | <i>Nitratifactor salsuginis</i> DSM 16511      |
| 1 | Cellular_org | <i>Nitratiruptor</i> sp. SB155-2               |
| 1 | Cellular_org | <i>Nitrobacter hamburgensis</i>                |
| 1 | Cellular_org | <i>Nitrobacter hamburgensis</i> X14            |
| 1 | Cellular_org | <i>Nitrobacter</i> sp. Nb-311A                 |
| 1 | Cellular_org | <i>Nitrobacter winogradskyi</i>                |
| 1 | Cellular_org | <i>Nitrobacter winogradskyi</i> Nb-255         |
| 1 | Cellular_org | <i>Nitrococcus mobilis</i>                     |
| 1 | Cellular_org | <i>Nitrococcus mobilis</i> Nb-231              |
| 1 | Cellular_org | <i>Nitrosococcus halophilus</i>                |
| 1 | Cellular_org | <i>Nitrosococcus halophilus</i> Nc4            |
| 1 | Cellular_org | <i>Nitrosococcus oceani</i>                    |
| 1 | Cellular_org | <i>Nitrosococcus oceani</i> AFC27              |
| 1 | Cellular_org | <i>Nitrosococcus oceani</i> ATCC 19707         |
| 1 | Cellular_org | <i>Nitrosococcus watsoni</i> C-113             |
| 1 | Cellular_org | <i>Nitrosomonas europaea</i>                   |
| 1 | Cellular_org | <i>Nitrosomonas europaea</i> ATCC 19718        |
| 1 | Cellular_org | <i>Nitrosomonas eutropha</i>                   |
| 1 | Cellular_org | <i>Nitrosomonas eutropha</i> C91               |
| 1 | Cellular_org | <i>Nitrosomonas</i> sp.                        |
| 1 | Cellular_org | <i>Nitrosomonas</i> sp. AL212                  |
| 1 | Cellular_org | <i>Nitrospira multiformis</i>                  |
| 1 | Cellular_org | <i>Nitrospira multiformis</i> ATCC 25196       |
| 1 | Cellular_org | <i>Nocardia aobensis</i>                       |
| 1 | Cellular_org | <i>Nocardia farcinica</i>                      |
| 1 | Cellular_org | <i>Nocardia farcinica</i> IFM 10152            |
| 1 | Cellular_org | <i>Nocardia</i> sp. 107                        |
| 1 | Cellular_org | <i>Nocardia</i> sp. C-14-1                     |



|   |              |                                                         |
|---|--------------|---------------------------------------------------------|
| 1 | Cellular_org | Nocardioides sp. JS614                                  |
| 1 | Cellular_org | Nocardiopsis dassonvillei                               |
| 1 | Cellular_org | Nocardiopsis dassonvillei subsp. dassonvillei           |
| 1 | Cellular_org | Nocardiopsis dassonvillei subsp. dassonvillei DSM 43111 |
| 1 | Cellular_org | Nocardiopsis sp. 90127                                  |
| 1 | Cellular_org | Nodularia spumigena                                     |
| 1 | Cellular_org | Nodularia spumigena CCY9414                             |
| 1 | Cellular_org | Nostoc punctiforme                                      |
| 1 | Cellular_org | Nostoc punctiforme PCC 73102                            |
| 1 | Cellular_org | Nostoc sp. PCC 7120                                     |
| 1 | Cellular_org | Nostoc sp. PCC 7524                                     |
| 1 | Cellular_org | Novosphingobium aromaticivorans                         |
| 1 | Cellular_org | Novosphingobium aromaticivorans DSM 12444               |
| 1 | Cellular_org | Oceanibulbus indolifex                                  |
| 1 | Cellular_org | Oceanibulbus indolifex HEL-45                           |
| 1 | Cellular_org | Oceanicola batsensis                                    |
| 1 | Cellular_org | Oceanicola batsensis HTCC2597                           |
| 1 | Cellular_org | Oceanicola granulosis                                   |
| 1 | Cellular_org | Oceanicola granulosis HTCC2516                          |
| 1 | Cellular_org | Oceanobacillus iheyensis                                |
| 1 | Cellular_org | Oceanobacillus iheyensis HTE831                         |
| 1 | Cellular_org | Ochrobactrum anthropi                                   |
| 1 | Cellular_org | Ochrobactrum anthropi ATCC 49188                        |
| 1 | Cellular_org | Ochrobactrum intermedium                                |
| 1 | Cellular_org | Ochrobactrum intermedium LMG 3301                       |
| 1 | Cellular_org | Octadecabacter antarcticus                              |
| 1 | Cellular_org | Octadecabacter antarcticus 238                          |
| 1 | Cellular_org | Octadecabacter antarcticus 307                          |
| 1 | Cellular_org | Oenococcus oeni                                         |
| 1 | Cellular_org | Oenococcus oeni ATCC BAA-1163                           |
| 1 | Cellular_org | Oenococcus oeni AWRIB429                                |
| 1 | Cellular_org | Oenococcus oeni PSU-1                                   |
| 1 | Cellular_org | Oligotropha carboxidovorans                             |
| 1 | Cellular_org | Oligotropha carboxidovorans OM5                         |
| 1 | Cellular_org | Olsenella uli DSM 7084                                  |
| 1 | Cellular_org | Onion yellows phytoplasma                               |
| 1 | Cellular_org | Onion yellows phytoplasma OY-M                          |
| 1 | Cellular_org | Opitutaceae bacterium TAV2                              |
| 1 | Cellular_org | Opitutus terrae                                         |
| 1 | Cellular_org | Opitutus terrae PB90-1                                  |
| 1 | Cellular_org | Oribacterium sinus F0268                                |
| 1 | Cellular_org | Oribacterium sp. oral taxon 078 str. F0262              |
| 1 | Cellular_org | Orientia tsutsugamushi                                  |

|   |              |                                                             |
|---|--------------|-------------------------------------------------------------|
| 1 | Cellular_org | <i>Orientia tsutsugamushi</i> str. Boryong                  |
| 1 | Cellular_org | <i>Orientia tsutsugamushi</i> str. Ikeda                    |
| 1 | Cellular_org | <i>Ornithobacterium rhinotracheale</i>                      |
| 1 | Cellular_org | <i>Oscillatoria</i> sp. PCC 6506                            |
| 1 | Cellular_org | <i>Oscillochloris trichoides</i>                            |
| 1 | Cellular_org | <i>Oxalobacter formigenes</i>                               |
| 1 | Cellular_org | <i>Oxalobacter formigenes</i> HOxBLS                        |
| 1 | Cellular_org | <i>Oxalobacter formigenes</i> OXCC13                        |
| 1 | Cellular_org | <i>Paenibacillus curdlanolyticus</i>                        |
| 1 | Cellular_org | <i>Paenibacillus curdlanolyticus</i> YK9                    |
| 1 | Cellular_org | <i>Paenibacillus larvae</i>                                 |
| 1 | Cellular_org | <i>Paenibacillus larvae</i> subsp. <i>larvae</i>            |
| 1 | Cellular_org | <i>Paenibacillus larvae</i> subsp. <i>larvae</i> BRL-230010 |
| 1 | Cellular_org | <i>Paenibacillus polymyxa</i>                               |
| 1 | Cellular_org | <i>Paenibacillus polymyxa</i> E681                          |
| 1 | Cellular_org | <i>Paenibacillus polymyxa</i> SC2                           |
| 1 | Cellular_org | <i>Paenibacillus popilliae</i>                              |
| 1 | Cellular_org | <i>Paenibacillus</i> sp. JDR-2                              |
| 1 | Cellular_org | <i>Paenibacillus</i> sp. oral taxon 786 str. D14            |
| 1 | Cellular_org | <i>Pantoea agglomerans</i>                                  |
| 1 | Cellular_org | <i>Pantoea ananatis</i>                                     |
| 1 | Cellular_org | <i>Pantoea ananatis</i> LMG 20103                           |
| 1 | Cellular_org | <i>Pantoea citrea</i>                                       |
| 1 | Cellular_org | <i>Pantoea</i> sp. At-9b                                    |
| 1 | Cellular_org | <i>Pantoea</i> sp. aB                                       |
| 1 | Cellular_org | <i>Pantoea vagans</i>                                       |
| 1 | Cellular_org | <i>Pantoea vagans</i> C9-1                                  |
| 1 | Cellular_org | <i>Parabacteroides distasonis</i>                           |
| 1 | Cellular_org | <i>Parabacteroides distasonis</i> ATCC 8503                 |
| 1 | Cellular_org | <i>Parabacteroides johnsonii</i> DSM 18315                  |
| 1 | Cellular_org | <i>Parabacteroides merdae</i>                               |
| 1 | Cellular_org | <i>Parabacteroides merdae</i> ATCC 43184                    |
| 1 | Cellular_org | <i>Parabacteroides</i> sp. D13                              |
| 1 | Cellular_org | <i>Parachlamydia acanthamoebae</i>                          |
| 1 | Cellular_org | <i>Parachlamydia acanthamoebae</i> str. Hall's coccus       |
| 1 | Cellular_org | <i>Paracoccus aminophilus</i>                               |
| 1 | Cellular_org | <i>Paracoccus denitrificans</i>                             |
| 1 | Cellular_org | <i>Paracoccus denitrificans</i> PD1222                      |
| 1 | Cellular_org | <i>Paracoccus methylutens</i>                               |
| 1 | Cellular_org | <i>Paracoccus pantotrophus</i>                              |
| 1 | Cellular_org | <i>Parascardovia denticolens</i> DSM 10105                  |
| 1 | Cellular_org | <i>Parascardovia denticolens</i> F0305                      |
| 1 | Cellular_org | <i>Parvibaculum lavamentivorans</i> DS-1                    |

|   |              |                                                        |
|---|--------------|--------------------------------------------------------|
| 1 | Cellular_org | Parvimonas micra                                       |
| 1 | Cellular_org | Parvimonas micra ATCC 33270                            |
| 1 | Cellular_org | Parvularcula bermudensis HTCC2503                      |
| 1 | Cellular_org | Pasteurella dagmatis                                   |
| 1 | Cellular_org | Pasteurella dagmatis ATCC 43325                        |
| 1 | Cellular_org | Pasteurella multocida                                  |
| 1 | Cellular_org | Pasteurella multocida subsp. multocida                 |
| 1 | Cellular_org | Pasteurella multocida subsp. multocida str. Pm70       |
| 1 | Cellular_org | Pasteuria nishizawae str. North American               |
| 1 | Cellular_org | Paulownia witches'-broom phytoplasma                   |
| 1 | Cellular_org | Peanut witches'-broom phytoplasma                      |
| 1 | Cellular_org | Pectobacterium atrosepticum                            |
| 1 | Cellular_org | Pectobacterium atrosepticum SCRI1043                   |
| 1 | Cellular_org | Pectobacterium carotovorum                             |
| 1 | Cellular_org | Pectobacterium carotovorum subsp. brasiliensis         |
| 1 | Cellular_org | Pectobacterium carotovorum subsp. brasiliensis PBR1692 |
| 1 | Cellular_org | Pectobacterium carotovorum subsp. carotovorum          |
| 1 | Cellular_org | Pectobacterium carotovorum subsp. carotovorum PC1      |
| 1 | Cellular_org | Pectobacterium carotovorum subsp. carotovorum WPP14    |
| 1 | Cellular_org | Pectobacterium wasabiae                                |
| 1 | Cellular_org | Pectobacterium wasabiae WPP163                         |
| 1 | Cellular_org | Pediococcus acidilactici                               |
| 1 | Cellular_org | Pediococcus acidilactici 7_4                           |
| 1 | Cellular_org | Pediococcus acidilactici DSM 20284                     |
| 1 | Cellular_org | Pediococcus damnosus                                   |
| 1 | Cellular_org | Pediococcus pentosaceus                                |
| 1 | Cellular_org | Pediococcus pentosaceus ATCC 25745                     |
| 1 | Cellular_org | Pedobacter heparinus                                   |
| 1 | Cellular_org | Pedobacter heparinus DSM 2366                          |
| 1 | Cellular_org | Pedobacter sp. BAL39                                   |
| 1 | Cellular_org | Pelagibaca bermudensis HTCC2601                        |
| 1 | Cellular_org | Pelobacter carbinolicus                                |
| 1 | Cellular_org | Pelobacter carbinolicus DSM 2380                       |
| 1 | Cellular_org | Pelobacter propionicus                                 |
| 1 | Cellular_org | Pelobacter propionicus DSM 2379                        |
| 1 | Cellular_org | Pelodictyon luteolum                                   |
| 1 | Cellular_org | Pelodictyon phaeoclathratiforme                        |
| 1 | Cellular_org | Pelodictyon phaeoclathratiforme BU-1                   |
| 1 | Cellular_org | Pelotomaculum thermopropionicum                        |
| 1 | Cellular_org | Pelotomaculum thermopropionicum SI                     |
| 1 | Cellular_org | Peptoniphilus duerdenii ATCC BAA-1640                  |
| 1 | Cellular_org | Peptoniphilus harei                                    |
| 1 | Cellular_org | Peptoniphilus lacrimalis                               |

|   |              |                                                        |
|---|--------------|--------------------------------------------------------|
| 1 | Cellular_org | Peptoniphilus lacrimalis 315-B                         |
| 1 | Cellular_org | Peptoniphilus sp. oral taxon 386 str. F0131            |
| 1 | Cellular_org | Peptoniphilus sp. oral taxon 836 str. F0141            |
| 1 | Cellular_org | Peptostreptococcus anaerobius                          |
| 1 | Cellular_org | Peptostreptococcus anaerobius 653-L                    |
| 1 | Cellular_org | Peptostreptococcus stomatis DSM 17678                  |
| 1 | Cellular_org | Persephonella marina                                   |
| 1 | Cellular_org | Persephonella marina EX-H1                             |
| 1 | Cellular_org | Petrogona mobilis SJ95                                 |
| 1 | Cellular_org | Phaeobacter gallaeciensis                              |
| 1 | Cellular_org | Phaeobacter gallaeciensis 2.10                         |
| 1 | Cellular_org | Phaeobacter gallaeciensis BS107                        |
| 1 | Cellular_org | Phenylobacterium zucineum                              |
| 1 | Cellular_org | Phenylobacterium zucineum HLK1                         |
| 1 | Cellular_org | Photobacterium angustum                                |
| 1 | Cellular_org | Photobacterium angustum S14                            |
| 1 | Cellular_org | Photobacterium damsela                                 |
| 1 | Cellular_org | Photobacterium damsela subsp. damsela                  |
| 1 | Cellular_org | Photobacterium damsela subsp. damsela CIP 102761       |
| 1 | Cellular_org | Photobacterium profundum                               |
| 1 | Cellular_org | Photobacterium profundum 3TCK                          |
| 1 | Cellular_org | Photobacterium profundum SS9                           |
| 1 | Cellular_org | Photobacterium sp. SKA34                               |
| 1 | Cellular_org | Photorhabdus asymbiotica                               |
| 1 | Cellular_org | Photorhabdus asymbiotica subsp. asymbiotica            |
| 1 | Cellular_org | Photorhabdus asymbiotica subsp. asymbiotica ATCC 43949 |
| 1 | Cellular_org | Photorhabdus luminescens                               |
| 1 | Cellular_org | Photorhabdus luminescens subsp. laumondii              |
| 1 | Cellular_org | Photorhabdus luminescens subsp. laumondii TTO1         |
| 1 | Cellular_org | Phytoplasma sp.                                        |
| 1 | Cellular_org | Pirellula staleyi                                      |
| 1 | Cellular_org | Pirellula staleyi DSM 6068                             |
| 1 | Cellular_org | Planctomyces brasiliensis DSM 5305                     |
| 1 | Cellular_org | Planctomyces limnophilus                               |
| 1 | Cellular_org | Planctomyces limnophilus DSM 3776                      |
| 1 | Cellular_org | Planctomyces maris                                     |
| 1 | Cellular_org | Planctomyces maris DSM 8797                            |
| 1 | Cellular_org | Planococcus sp. ZOYM                                   |
| 1 | Cellular_org | Plesiocystis pacifica                                  |
| 1 | Cellular_org | Plesiocystis pacifica SIR-1                            |
| 1 | Cellular_org | Polaribacter irgensii 23-P                             |
| 1 | Cellular_org | Polaribacter sp. MED152                                |

|   |              |                                                                             |
|---|--------------|-----------------------------------------------------------------------------|
| 1 | Cellular_org | <i>Polaromonas naphthalenivorans</i> CJ2                                    |
| 1 | Cellular_org | <i>Polaromonas</i> sp. JS666                                                |
| 1 | Cellular_org | <i>Polynucleobacter necessarius</i> subsp. <i>asymbioticus</i>              |
| 1 | Cellular_org | <i>Polynucleobacter necessarius</i> subsp. <i>asymbioticus</i> QLW-P1DMWA-1 |
| 1 | Cellular_org | <i>Polynucleobacter necessarius</i> subsp. <i>necessarius</i>               |
| 1 | Cellular_org | <i>Polynucleobacter necessarius</i> subsp. <i>necessarius</i> STIR1         |
| 1 | Cellular_org | <i>Porphyromonas asaccharolytica</i>                                        |
| 1 | Cellular_org | <i>Porphyromonas endodontalis</i>                                           |
| 1 | Cellular_org | <i>Porphyromonas endodontalis</i> ATCC 35406                                |
| 1 | Cellular_org | <i>Porphyromonas gingivalis</i>                                             |
| 1 | Cellular_org | <i>Porphyromonas gingivalis</i> ATCC 33277                                  |
| 1 | Cellular_org | <i>Porphyromonas gingivalis</i> W83                                         |
| 1 | Cellular_org | <i>Porphyromonas uenonis</i>                                                |
| 1 | Cellular_org | <i>Porphyromonas uenonis</i> 60-3                                           |
| 1 | Cellular_org | <i>Prevotella amnii</i>                                                     |
| 1 | Cellular_org | <i>Prevotella amnii</i> CRIS 21A-A                                          |
| 1 | Cellular_org | <i>Prevotella bergensis</i>                                                 |
| 1 | Cellular_org | <i>Prevotella bergensis</i> DSM 17361                                       |
| 1 | Cellular_org | <i>Prevotella bivia</i>                                                     |
| 1 | Cellular_org | <i>Prevotella bivia</i> JCVIHMP010                                          |
| 1 | Cellular_org | <i>Prevotella bryantii</i>                                                  |
| 1 | Cellular_org | <i>Prevotella bryantii</i> B14                                              |
| 1 | Cellular_org | <i>Prevotella buccae</i>                                                    |
| 1 | Cellular_org | <i>Prevotella buccae</i> ATCC 33574                                         |
| 1 | Cellular_org | <i>Prevotella buccae</i> D17                                                |
| 1 | Cellular_org | <i>Prevotella buccalis</i>                                                  |
| 1 | Cellular_org | <i>Prevotella buccalis</i> ATCC 35310                                       |
| 1 | Cellular_org | <i>Prevotella copri</i> DSM 18205                                           |
| 1 | Cellular_org | <i>Prevotella disiens</i>                                                   |
| 1 | Cellular_org | <i>Prevotella disiens</i> FB035-09AN                                        |
| 1 | Cellular_org | <i>Prevotella marshii</i>                                                   |
| 1 | Cellular_org | <i>Prevotella marshii</i> DSM 16973                                         |
| 1 | Cellular_org | <i>Prevotella melaninogenica</i>                                            |
| 1 | Cellular_org | <i>Prevotella melaninogenica</i> ATCC 25845                                 |
| 1 | Cellular_org | <i>Prevotella melaninogenica</i> D18                                        |
| 1 | Cellular_org | <i>Prevotella oralis</i>                                                    |
| 1 | Cellular_org | <i>Prevotella oralis</i> ATCC 33269                                         |
| 1 | Cellular_org | <i>Prevotella oris</i>                                                      |
| 1 | Cellular_org | <i>Prevotella oris</i> C735                                                 |
| 1 | Cellular_org | <i>Prevotella oris</i> F0302                                                |
| 1 | Cellular_org | <i>Prevotella ruminicola</i>                                                |
| 1 | Cellular_org | <i>Prevotella ruminicola</i> 23                                             |

|   |              |                                                             |
|---|--------------|-------------------------------------------------------------|
| 1 | Cellular_org | Prevotella salivae DSM 15606                                |
| 1 | Cellular_org | Prevotella sp. oral taxon 299 str. F0039                    |
| 1 | Cellular_org | Prevotella sp. oral taxon 317 str. F0108                    |
| 1 | Cellular_org | Prevotella sp. oral taxon 472 str. F0295                    |
| 1 | Cellular_org | Prevotella tanneriae ATCC 51259                             |
| 1 | Cellular_org | Prevotella timonensis                                       |
| 1 | Cellular_org | Prevotella timonensis CRIS 5C-B1                            |
| 1 | Cellular_org | Prevotella veroralis                                        |
| 1 | Cellular_org | Prevotella veroralis F0319                                  |
| 1 | Cellular_org | Prochlorococcus marinus                                     |
| 1 | Cellular_org | Prochlorococcus marinus str. AS9601                         |
| 1 | Cellular_org | Prochlorococcus marinus str. MIT 9202                       |
| 1 | Cellular_org | Prochlorococcus marinus str. MIT 9211                       |
| 1 | Cellular_org | Prochlorococcus marinus str. MIT 9215                       |
| 1 | Cellular_org | Prochlorococcus marinus str. MIT 9301                       |
| 1 | Cellular_org | Prochlorococcus marinus str. MIT 9303                       |
| 1 | Cellular_org | Prochlorococcus marinus str. MIT 9312                       |
| 1 | Cellular_org | Prochlorococcus marinus str. MIT 9313                       |
| 1 | Cellular_org | Prochlorococcus marinus str. MIT 9515                       |
| 1 | Cellular_org | Prochlorococcus marinus str. NATL1A                         |
| 1 | Cellular_org | Prochlorococcus marinus str. NATL2A                         |
| 1 | Cellular_org | Prochlorococcus marinus subsp. marinus str. CCMP1375        |
| 1 | Cellular_org | Prochlorococcus marinus subsp. pastoris                     |
| 1 | Cellular_org | Prochlorococcus marinus subsp. pastoris str. CCMP1986       |
| 1 | Cellular_org | Propionibacterium acidipropionici                           |
| 1 | Cellular_org | Propionibacterium acnes                                     |
| 1 | Cellular_org | Propionibacterium acnes J139                                |
| 1 | Cellular_org | Propionibacterium acnes J165                                |
| 1 | Cellular_org | Propionibacterium acnes KPA171202                           |
| 1 | Cellular_org | Propionibacterium acnes SK137                               |
| 1 | Cellular_org | Propionibacterium acnes SK187                               |
| 1 | Cellular_org | Propionibacterium freudenreichii                            |
| 1 | Cellular_org | Propionibacterium freudenreichii subsp. shermanii           |
| 1 | Cellular_org | Propionibacterium freudenreichii subsp. shermanii CIRM-BIA1 |
| 1 | Cellular_org | Propionibacterium granulosum                                |
| 1 | Cellular_org | Propionibacterium jensenii                                  |
| 1 | Cellular_org | Prosthecochloris aestuarii                                  |
| 1 | Cellular_org | Prosthecochloris aestuarii DSM 271                          |
| 1 | Cellular_org | Proteus mirabilis                                           |
| 1 | Cellular_org | Proteus mirabilis ATCC 29906                                |
| 1 | Cellular_org | Proteus mirabilis HI4320                                    |
| 1 | Cellular_org | Proteus penneri                                             |

|   |              |                                       |
|---|--------------|---------------------------------------|
| 1 | Cellular_org | Proteus penneri ATCC 35198            |
| 1 | Cellular_org | Proteus vulgaris                      |
| 1 | Cellular_org | Providencia alcalifaciens             |
| 1 | Cellular_org | Providencia alcalifaciens DSM 30120   |
| 1 | Cellular_org | Providencia rettgeri                  |
| 1 | Cellular_org | Providencia rettgeri DSM 1131         |
| 1 | Cellular_org | Providencia rustigianii               |
| 1 | Cellular_org | Providencia rustigianii DSM 4541      |
| 1 | Cellular_org | Providencia stuartii                  |
| 1 | Cellular_org | Providencia stuartii ATCC 25827       |
| 1 | Cellular_org | Pseudoalteromonas atlantica           |
| 1 | Cellular_org | Pseudoalteromonas atlantica T6c       |
| 1 | Cellular_org | Pseudoalteromonas haloplanktis        |
| 1 | Cellular_org | Pseudoalteromonas haloplanktis TAC125 |
| 1 | Cellular_org | Pseudoalteromonas sp. 643A            |
| 1 | Cellular_org | Pseudoalteromonas sp. BSi20327        |
| 1 | Cellular_org | Pseudoalteromonas sp. PS1M3           |
| 1 | Cellular_org | Pseudoalteromonas sp. SM9913          |
| 1 | Cellular_org | Pseudoalteromonas tunicata            |
| 1 | Cellular_org | Pseudoalteromonas tunicata D2         |
| 1 | Cellular_org | Pseudomonas                           |
| 1 | Cellular_org | Pseudomonas aeruginosa                |
| 1 | Cellular_org | Pseudomonas aeruginosa 2192           |
| 1 | Cellular_org | Pseudomonas aeruginosa C3719          |
| 1 | Cellular_org | Pseudomonas aeruginosa LESB58         |
| 1 | Cellular_org | Pseudomonas aeruginosa PA7            |
| 1 | Cellular_org | Pseudomonas aeruginosa PACS2          |
| 1 | Cellular_org | Pseudomonas aeruginosa PAO1           |
| 1 | Cellular_org | Pseudomonas aeruginosa PAb1           |
| 1 | Cellular_org | Pseudomonas aeruginosa UCBPP-PA14     |
| 1 | Cellular_org | Pseudomonas alcaligenes               |
| 1 | Cellular_org | Pseudomonas amygdali                  |
| 1 | Cellular_org | Pseudomonas coronafaciens             |
| 1 | Cellular_org | Pseudomonas entomophila               |
| 1 | Cellular_org | Pseudomonas entomophila L48           |
| 1 | Cellular_org | Pseudomonas fluorescens               |
| 1 | Cellular_org | Pseudomonas fluorescens Pf-5          |
| 1 | Cellular_org | Pseudomonas fluorescens Pf0-1         |
| 1 | Cellular_org | Pseudomonas fluorescens SBW25         |
| 1 | Cellular_org | Pseudomonas fulva                     |
| 1 | Cellular_org | Pseudomonas mendocina                 |
| 1 | Cellular_org | Pseudomonas mendocina ymp             |
| 1 | Cellular_org | Pseudomonas putida                    |

|   |              |                                                                |
|---|--------------|----------------------------------------------------------------|
| 1 | Cellular_org | <i>Pseudomonas putida</i> F1                                   |
| 1 | Cellular_org | <i>Pseudomonas putida</i> GB-1                                 |
| 1 | Cellular_org | <i>Pseudomonas putida</i> KT2440                               |
| 1 | Cellular_org | <i>Pseudomonas putida</i> W619                                 |
| 1 | Cellular_org | <i>Pseudomonas resinovorans</i>                                |
| 1 | Cellular_org | <i>Pseudomonas savastanoi</i>                                  |
| 1 | Cellular_org | <i>Pseudomonas savastanoi</i> pv. <i>savastanoi</i>            |
| 1 | Cellular_org | <i>Pseudomonas savastanoi</i> pv. <i>savastanoi</i> NCPPB 3335 |
| 1 | Cellular_org | <i>Pseudomonas</i> sp. ADP                                     |
| 1 | Cellular_org | <i>Pseudomonas</i> sp. CA10                                    |
| 1 | Cellular_org | <i>Pseudomonas</i> sp. CG21                                    |
| 1 | Cellular_org | <i>Pseudomonas</i> sp. CT14                                    |
| 1 | Cellular_org | <i>Pseudomonas</i> sp. ND6                                     |
| 1 | Cellular_org | <i>Pseudomonas</i> sp. S-47                                    |
| 1 | Cellular_org | <i>Pseudomonas</i> sp. SLT2001                                 |
| 1 | Cellular_org | <i>Pseudomonas</i> sp. UK4                                     |
| 1 | Cellular_org | <i>Pseudomonas stutzeri</i>                                    |
| 1 | Cellular_org | <i>Pseudomonas stutzeri</i> A1501                              |
| 1 | Cellular_org | <i>Pseudomonas syringae</i>                                    |
| 1 | Cellular_org | <i>Pseudomonas syringae</i> pv. <i>aesculi</i>                 |
| 1 | Cellular_org | <i>Pseudomonas syringae</i> pv. <i>aesculi</i> str. 2250       |
| 1 | Cellular_org | <i>Pseudomonas syringae</i> pv. <i>aesculi</i> str. NCPPB3681  |
| 1 | Cellular_org | <i>Pseudomonas syringae</i> pv. <i>maculicola</i>              |
| 1 | Cellular_org | <i>Pseudomonas syringae</i> pv. <i>maculicola</i> str. M6      |
| 1 | Cellular_org | <i>Pseudomonas syringae</i> pv. <i>oryzae</i>                  |
| 1 | Cellular_org | <i>Pseudomonas syringae</i> pv. <i>oryzae</i> str. 1_6         |
| 1 | Cellular_org | <i>Pseudomonas syringae</i> pv. <i>phaseolicola</i>            |
| 1 | Cellular_org | <i>Pseudomonas syringae</i> pv. <i>phaseolicola</i> 1448A      |
| 1 | Cellular_org | <i>Pseudomonas syringae</i> pv. <i>syringae</i>                |
| 1 | Cellular_org | <i>Pseudomonas syringae</i> pv. <i>syringae</i> 642            |
| 1 | Cellular_org | <i>Pseudomonas syringae</i> pv. <i>syringae</i> B728a          |
| 1 | Cellular_org | <i>Pseudomonas syringae</i> pv. <i>syringae</i> FF5            |
| 1 | Cellular_org | <i>Pseudomonas syringae</i> pv. <i>tabaci</i>                  |
| 1 | Cellular_org | <i>Pseudomonas syringae</i> pv. <i>tabaci</i> ATCC 11528       |
| 1 | Cellular_org | <i>Pseudomonas syringae</i> pv. <i>tomato</i>                  |
| 1 | Cellular_org | <i>Pseudomonas syringae</i> pv. <i>tomato</i> K40              |
| 1 | Cellular_org | <i>Pseudomonas syringae</i> pv. <i>tomato</i> Max13            |
| 1 | Cellular_org | <i>Pseudomonas syringae</i> pv. <i>tomato</i> NCPPB 1108       |
| 1 | Cellular_org | <i>Pseudomonas syringae</i> pv. <i>tomato</i> T1               |
| 1 | Cellular_org | <i>Pseudomonas syringae</i> pv. <i>tomato</i> str. DC3000      |
| 1 | Cellular_org | <i>Pseudonocardia autotrophica</i>                             |
| 1 | Cellular_org | <i>Pseudovibrio</i> sp. JE062                                  |
| 1 | Cellular_org | <i>Psychrobacter arcticus</i>                                  |



|   |              |                                              |
|---|--------------|----------------------------------------------|
| 1 | Cellular_org | Psychrobacter arcticus 273-4                 |
| 1 | Cellular_org | Psychrobacter cryohalolentis                 |
| 1 | Cellular_org | Psychrobacter cryohalolentis K5              |
| 1 | Cellular_org | Psychrobacter sp. PRwf-1                     |
| 1 | Cellular_org | Psychroflexus torquis ATCC 700755            |
| 1 | Cellular_org | Psychromonas ingrahamii 37                   |
| 1 | Cellular_org | Psychromonas sp. CNPT3                       |
| 1 | Cellular_org | Pyramidobacter piscolens W5455               |
| 1 | Cellular_org | Rahnella sp. 'WMR15'                         |
| 1 | Cellular_org | Ralstonia eutropha H16                       |
| 1 | Cellular_org | Ralstonia eutropha JMP134                    |
| 1 | Cellular_org | Ralstonia pickettii                          |
| 1 | Cellular_org | Ralstonia pickettii 12D                      |
| 1 | Cellular_org | Ralstonia pickettii 12J                      |
| 1 | Cellular_org | Ralstonia solanacearum                       |
| 1 | Cellular_org | Ralstonia solanacearum CFBP2957              |
| 1 | Cellular_org | Ralstonia solanacearum GMI1000               |
| 1 | Cellular_org | Ralstonia solanacearum MoIK2                 |
| 1 | Cellular_org | Ralstonia solanacearum PSI07                 |
| 1 | Cellular_org | Ralstonia solanacearum UW551                 |
| 1 | Cellular_org | Ralstonia sp. 5_7_47FAA                      |
| 1 | Cellular_org | Raphidiopsis brookii D9                      |
| 1 | Cellular_org | Renibacterium salmoninarum                   |
| 1 | Cellular_org | Renibacterium salmoninarum ATCC 33209        |
| 1 | Cellular_org | Rhizobium etli                               |
| 1 | Cellular_org | Rhizobium etli 8C-3                          |
| 1 | Cellular_org | Rhizobium etli Brasil 5                      |
| 1 | Cellular_org | Rhizobium etli CFN 42                        |
| 1 | Cellular_org | Rhizobium etli CIAT 652                      |
| 1 | Cellular_org | Rhizobium etli CIAT 894                      |
| 1 | Cellular_org | Rhizobium etli GR56                          |
| 1 | Cellular_org | Rhizobium etli IE4771                        |
| 1 | Cellular_org | Rhizobium etli Kim 5                         |
| 1 | Cellular_org | Rhizobium leguminosarum                      |
| 1 | Cellular_org | Rhizobium leguminosarum bv. trifolii         |
| 1 | Cellular_org | Rhizobium leguminosarum bv. trifolii WSM1325 |
| 1 | Cellular_org | Rhizobium leguminosarum bv. trifolii WSM2304 |
| 1 | Cellular_org | Rhizobium leguminosarum bv. viciae           |
| 1 | Cellular_org | Rhizobium leguminosarum bv. viciae 3841      |
| 1 | Cellular_org | Rhodobacter blasticus                        |
| 1 | Cellular_org | Rhodobacter capsulatus                       |
| 1 | Cellular_org | Rhodobacter capsulatus SB 1003               |
| 1 | Cellular_org | Rhodobacter sp. SW2                          |

|   |              |                                     |
|---|--------------|-------------------------------------|
| 1 | Cellular_org | Rhodobacter sphaeroides             |
| 1 | Cellular_org | Rhodobacter sphaeroides 2.4.1       |
| 1 | Cellular_org | Rhodobacter sphaeroides ATCC 17025  |
| 1 | Cellular_org | Rhodobacter sphaeroides ATCC 17029  |
| 1 | Cellular_org | Rhodobacter sphaeroides KD131       |
| 1 | Cellular_org | Rhodobacteraceae bacterium KLH11    |
| 1 | Cellular_org | Rhodobacterales bacterium Y4I       |
| 1 | Cellular_org | Rhodococcus aetherivorans           |
| 1 | Cellular_org | Rhodococcus equi                    |
| 1 | Cellular_org | Rhodococcus equi ATCC 33707         |
| 1 | Cellular_org | Rhodococcus erythropolis            |
| 1 | Cellular_org | Rhodococcus erythropolis PR4        |
| 1 | Cellular_org | Rhodococcus erythropolis SK121      |
| 1 | Cellular_org | Rhodococcus jostii                  |
| 1 | Cellular_org | Rhodococcus jostii RHA1             |
| 1 | Cellular_org | Rhodococcus opacus                  |
| 1 | Cellular_org | Rhodococcus opacus B4               |
| 1 | Cellular_org | Rhodococcus rhodochrous             |
| 1 | Cellular_org | Rhodococcus sp. B264-1              |
| 1 | Cellular_org | Rhodococcus sp. NS1                 |
| 1 | Cellular_org | Rhodoferax ferrireducens T118       |
| 1 | Cellular_org | Rhodomicrobium vannielii            |
| 1 | Cellular_org | Rhodomicrobium vannielii ATCC 17100 |
| 1 | Cellular_org | Rhodopirellula baltica              |
| 1 | Cellular_org | Rhodopirellula baltica SH 1         |
| 1 | Cellular_org | Rhodopseudomonas palustris          |
| 1 | Cellular_org | Rhodopseudomonas palustris BisA53   |
| 1 | Cellular_org | Rhodopseudomonas palustris BisB18   |
| 1 | Cellular_org | Rhodopseudomonas palustris BisB5    |
| 1 | Cellular_org | Rhodopseudomonas palustris CGA009   |
| 1 | Cellular_org | Rhodopseudomonas palustris DX-1     |
| 1 | Cellular_org | Rhodopseudomonas palustris HaA2     |
| 1 | Cellular_org | Rhodopseudomonas palustris TIE-1    |
| 1 | Cellular_org | Rhodospirillum centenum             |
| 1 | Cellular_org | Rhodospirillum centenum SW          |
| 1 | Cellular_org | Rhodospirillum rubrum               |
| 1 | Cellular_org | Rhodospirillum rubrum ATCC 11170    |
| 1 | Cellular_org | Rhodothermus marinus                |
| 1 | Cellular_org | Rhodothermus marinus DSM 4252       |
| 1 | Cellular_org | Rickettsia africae                  |
| 1 | Cellular_org | Rickettsia africae ESF-5            |
| 1 | Cellular_org | Rickettsia akari str. Hartford      |
| 1 | Cellular_org | Rickettsia bellii                   |

|   |              |                                                            |
|---|--------------|------------------------------------------------------------|
| 1 | Cellular_org | <i>Rickettsia bellii</i> OSU 85-389                        |
| 1 | Cellular_org | <i>Rickettsia bellii</i> RML369-C                          |
| 1 | Cellular_org | <i>Rickettsia canadensis</i>                               |
| 1 | Cellular_org | <i>Rickettsia canadensis</i> str. McKiel                   |
| 1 | Cellular_org | <i>Rickettsia conorii</i>                                  |
| 1 | Cellular_org | <i>Rickettsia conorii</i> str. Malish 7                    |
| 1 | Cellular_org | <i>Rickettsia endosymbiont</i> of <i>Ixodes scapularis</i> |
| 1 | Cellular_org | <i>Rickettsia felis</i>                                    |
| 1 | Cellular_org | <i>Rickettsia felis</i> URRWXCal2                          |
| 1 | Cellular_org | <i>Rickettsia massiliae</i>                                |
| 1 | Cellular_org | <i>Rickettsia massiliae</i> MTU5                           |
| 1 | Cellular_org | <i>Rickettsia monacensis</i>                               |
| 1 | Cellular_org | <i>Rickettsia peacockii</i>                                |
| 1 | Cellular_org | <i>Rickettsia peacockii</i> str. Rustic                    |
| 1 | Cellular_org | <i>Rickettsia prowazekii</i>                               |
| 1 | Cellular_org | <i>Rickettsia prowazekii</i> str. Madrid E                 |
| 1 | Cellular_org | <i>Rickettsia rickettsii</i>                               |
| 1 | Cellular_org | <i>Rickettsia rickettsii</i> str. 'Sheila Smith'           |
| 1 | Cellular_org | <i>Rickettsia rickettsii</i> str. Iowa                     |
| 1 | Cellular_org | <i>Rickettsia sibirica</i>                                 |
| 1 | Cellular_org | <i>Rickettsia sibirica</i> 246                             |
| 1 | Cellular_org | <i>Rickettsia typhi</i>                                    |
| 1 | Cellular_org | <i>Rickettsia typhi</i> str. Wilmington                    |
| 1 | Cellular_org | <i>Rickettsiella grylli</i>                                |
| 1 | Cellular_org | <i>Riemerella anatipestifer</i>                            |
| 1 | Cellular_org | <i>Robiginitalea biformata</i> HTCC2501                    |
| 1 | Cellular_org | <i>Roseburia intestinalis</i>                              |
| 1 | Cellular_org | <i>Roseburia intestinalis</i> L1-82                        |
| 1 | Cellular_org | <i>Roseburia inulinivorans</i>                             |
| 1 | Cellular_org | <i>Roseburia inulinivorans</i> DSM 16841                   |
| 1 | Cellular_org | <i>Roseibium</i> sp. TrichSKD4                             |
| 1 | Cellular_org | <i>Roseiflexus castenholzii</i>                            |
| 1 | Cellular_org | <i>Roseiflexus castenholzii</i> DSM 13941                  |
| 1 | Cellular_org | <i>Roseiflexus</i> sp. RS-1                                |
| 1 | Cellular_org | <i>Roseobacter denitrificans</i>                           |
| 1 | Cellular_org | <i>Roseobacter denitrificans</i> OCh 114                   |
| 1 | Cellular_org | <i>Roseobacter litoralis</i>                               |
| 1 | Cellular_org | <i>Roseobacter litoralis</i> Och 149                       |
| 1 | Cellular_org | <i>Roseobacter</i> sp. AzwK-3b                             |
| 1 | Cellular_org | <i>Roseobacter</i> sp. CCS2                                |
| 1 | Cellular_org | <i>Roseobacter</i> sp. GAI101                              |
| 1 | Cellular_org | <i>Roseobacter</i> sp. MED193                              |
| 1 | Cellular_org | <i>Roseobacter</i> sp. SK209-2-6                           |

|   |              |                                       |
|---|--------------|---------------------------------------|
| 1 | Cellular_org | Roseomonas cervicalis ATCC 49957      |
| 1 | Cellular_org | Roseovarius nubinhibens               |
| 1 | Cellular_org | Roseovarius nubinhibens ISM           |
| 1 | Cellular_org | Roseovarius sp. 217                   |
| 1 | Cellular_org | Roseovarius sp. TM1035                |
| 1 | Cellular_org | Rothia dentocariosa                   |
| 1 | Cellular_org | Rothia dentocariosa ATCC 17931        |
| 1 | Cellular_org | Rothia dentocariosa M567              |
| 1 | Cellular_org | Rothia mucilaginosa ATCC 25296        |
| 1 | Cellular_org | Rothia mucilaginosa DY-18             |
| 1 | Cellular_org | Rubrobacter xylanophilus              |
| 1 | Cellular_org | Rubrobacter xylanophilus DSM 9941     |
| 1 | Cellular_org | Ruegeria pomeroyi                     |
| 1 | Cellular_org | Ruegeria pomeroyi DSS-3               |
| 1 | Cellular_org | Ruegeria sp. PR1b                     |
| 1 | Cellular_org | Ruegeria sp. R11                      |
| 1 | Cellular_org | Ruegeria sp. TM1040                   |
| 1 | Cellular_org | Ruminococcaceae bacterium D16         |
| 1 | Cellular_org | Ruminococcus albus                    |
| 1 | Cellular_org | Ruminococcus albus 7                  |
| 1 | Cellular_org | Ruminococcus albus 8                  |
| 1 | Cellular_org | Ruminococcus flavefaciens             |
| 1 | Cellular_org | Ruminococcus flavefaciens FD-1        |
| 1 | Cellular_org | Ruminococcus gnavus                   |
| 1 | Cellular_org | Ruminococcus gnavus ATCC 29149        |
| 1 | Cellular_org | Ruminococcus lactaris ATCC 29176      |
| 1 | Cellular_org | Ruminococcus obeum ATCC 29174         |
| 1 | Cellular_org | Ruminococcus torques ATCC 27756       |
| 1 | Cellular_org | Saccharomonospora viridis             |
| 1 | Cellular_org | Saccharomonospora viridis DSM 43017   |
| 1 | Cellular_org | Saccharophagus degradans 2-40         |
| 1 | Cellular_org | Saccharopolyspora erythraea           |
| 1 | Cellular_org | Saccharopolyspora erythraea NRRL 2338 |
| 1 | Cellular_org | Sagittula stellata                    |
| 1 | Cellular_org | Sagittula stellata E-37               |
| 1 | Cellular_org | Salinibacter ruber                    |
| 1 | Cellular_org | Salinibacter ruber DSM 13855          |
| 1 | Cellular_org | Salinibacter ruber M8                 |
| 1 | Cellular_org | Salinispora arenicola                 |
| 1 | Cellular_org | Salinispora arenicola CNS-205         |
| 1 | Cellular_org | Salinispora tropica                   |
| 1 | Cellular_org | Salinispora tropica CNB-440           |
| 1 | Cellular_org | Salmonella enterica                   |

|   |              |                                                                           |
|---|--------------|---------------------------------------------------------------------------|
| 1 | Cellular_org | Salmonella enterica subsp. arizonae                                       |
| 1 | Cellular_org | Salmonella enterica subsp. arizonae serovar 62:z4,z23:--                  |
| 1 | Cellular_org | Salmonella enterica subsp. arizonae serovar 62:z4,z23:--<br>str. RSK2980  |
| 1 | Cellular_org | Salmonella enterica subsp. enterica                                       |
| 1 | Cellular_org | Salmonella enterica subsp. enterica serovar Agona                         |
| 1 | Cellular_org | Salmonella enterica subsp. enterica serovar Agona str.<br>SL483           |
| 1 | Cellular_org | Salmonella enterica subsp. enterica serovar Berta                         |
| 1 | Cellular_org | Salmonella enterica subsp. enterica serovar<br>Bovismorbificans           |
| 1 | Cellular_org | Salmonella enterica subsp. enterica serovar Brandenburg                   |
| 1 | Cellular_org | Salmonella enterica subsp. enterica serovar Choleraesuis                  |
| 1 | Cellular_org | Salmonella enterica subsp. enterica serovar Choleraesuis<br>str. SC-B67   |
| 1 | Cellular_org | Salmonella enterica subsp. enterica serovar Dublin                        |
| 1 | Cellular_org | Salmonella enterica subsp. enterica serovar Dublin str.<br>CT_02021853    |
| 1 | Cellular_org | Salmonella enterica subsp. enterica serovar Enteritidis                   |
| 1 | Cellular_org | Salmonella enterica subsp. enterica serovar Enteritidis str.<br>P125109   |
| 1 | Cellular_org | Salmonella enterica subsp. enterica serovar Gallinarum                    |
| 1 | Cellular_org | Salmonella enterica subsp. enterica serovar Gallinarum<br>str. 287/91     |
| 1 | Cellular_org | Salmonella enterica subsp. enterica serovar Hadar                         |
| 1 | Cellular_org | Salmonella enterica subsp. enterica serovar Hadar str.<br>RI_05P066       |
| 1 | Cellular_org | Salmonella enterica subsp. enterica serovar Heidelberg                    |
| 1 | Cellular_org | Salmonella enterica subsp. enterica serovar Heidelberg<br>str. SL476      |
| 1 | Cellular_org | Salmonella enterica subsp. enterica serovar Heidelberg<br>str. SL486      |
| 1 | Cellular_org | Salmonella enterica subsp. enterica serovar Javiana                       |
| 1 | Cellular_org | Salmonella enterica subsp. enterica serovar Javiana str.<br>GA_MM04042433 |
| 1 | Cellular_org | Salmonella enterica subsp. enterica serovar Kentucky                      |
| 1 | Cellular_org | Salmonella enterica subsp. enterica serovar Kentucky str.<br>CDC 191      |
| 1 | Cellular_org | Salmonella enterica subsp. enterica serovar Kentucky str.<br>CVM29188     |
| 1 | Cellular_org | Salmonella enterica subsp. enterica serovar Newport                       |
| 1 | Cellular_org | Salmonella enterica subsp. enterica serovar Newport str.<br>SL254         |

|   |              |                                                                          |
|---|--------------|--------------------------------------------------------------------------|
| 1 | Cellular_org | Salmonella enterica subsp. enterica serovar Newport str. SL317           |
| 1 | Cellular_org | Salmonella enterica subsp. enterica serovar Paratyphi A                  |
| 1 | Cellular_org | Salmonella enterica subsp. enterica serovar Paratyphi A str. AKU_12601   |
| 1 | Cellular_org | Salmonella enterica subsp. enterica serovar Paratyphi A str. ATCC 9150   |
| 1 | Cellular_org | Salmonella enterica subsp. enterica serovar Paratyphi B                  |
| 1 | Cellular_org | Salmonella enterica subsp. enterica serovar Paratyphi B str. SPB7        |
| 1 | Cellular_org | Salmonella enterica subsp. enterica serovar Paratyphi C                  |
| 1 | Cellular_org | Salmonella enterica subsp. enterica serovar Paratyphi C strain RKS4594   |
| 1 | Cellular_org | Salmonella enterica subsp. enterica serovar Saintpaul                    |
| 1 | Cellular_org | Salmonella enterica subsp. enterica serovar Saintpaul str. SARA23        |
| 1 | Cellular_org | Salmonella enterica subsp. enterica serovar Saintpaul str. SARA29        |
| 1 | Cellular_org | Salmonella enterica subsp. enterica serovar Schwarzengrund               |
| 1 | Cellular_org | Salmonella enterica subsp. enterica serovar Schwarzengrund str. CVM19633 |
| 1 | Cellular_org | Salmonella enterica subsp. enterica serovar Schwarzengrund str. SL480    |
| 1 | Cellular_org | Salmonella enterica subsp. enterica serovar Tennessee                    |
| 1 | Cellular_org | Salmonella enterica subsp. enterica serovar Tennessee str. CDC07-0191    |
| 1 | Cellular_org | Salmonella enterica subsp. enterica serovar Typhi                        |
| 1 | Cellular_org | Salmonella enterica subsp. enterica serovar Typhi str. 404ty             |
| 1 | Cellular_org | Salmonella enterica subsp. enterica serovar Typhi str. AG3               |
| 1 | Cellular_org | Salmonella enterica subsp. enterica serovar Typhi str. CT18              |
| 1 | Cellular_org | Salmonella enterica subsp. enterica serovar Typhi str. E00-7866          |
| 1 | Cellular_org | Salmonella enterica subsp. enterica serovar Typhi str. E01-6750          |
| 1 | Cellular_org | Salmonella enterica subsp. enterica serovar Typhi str. E02-1180          |
| 1 | Cellular_org | Salmonella enterica subsp. enterica serovar Typhi str. E98-0664          |
| 1 | Cellular_org | Salmonella enterica subsp. enterica serovar Typhi str. E98-2068          |

|   |              |                                                                         |
|---|--------------|-------------------------------------------------------------------------|
| 1 | Cellular_org | Salmonella enterica subsp. enterica serovar Typhi str. E98-3139         |
| 1 | Cellular_org | Salmonella enterica subsp. enterica serovar Typhi str. J185             |
| 1 | Cellular_org | Salmonella enterica subsp. enterica serovar Typhi str. M223             |
| 1 | Cellular_org | Salmonella enterica subsp. enterica serovar Typhi str. Ty2              |
| 1 | Cellular_org | Salmonella enterica subsp. enterica serovar Typhimurium                 |
| 1 | Cellular_org | Salmonella enterica subsp. enterica serovar Typhimurium str. LT2        |
| 1 | Cellular_org | Salmonella enterica subsp. enterica serovar Virchow                     |
| 1 | Cellular_org | Salmonella enterica subsp. enterica serovar Virchow str. SL491          |
| 1 | Cellular_org | Salmonella enterica subsp. enterica serovar Weltevreden                 |
| 1 | Cellular_org | Salmonella enterica subsp. enterica serovar Weltevreden str. HI_N05-537 |
| 1 | Cellular_org | Salmonella enterica subsp. enterica serovar Westhampton                 |
| 1 | Cellular_org | Sanguibacter keddiei DSM 10542                                          |
| 1 | Cellular_org | Scardovia inopinata                                                     |
| 1 | Cellular_org | Scardovia inopinata F0304                                               |
| 1 | Cellular_org | Sebaldella termitidis ATCC 33386                                        |
| 1 | Cellular_org | Segniliparus rotundus DSM 44985                                         |
| 1 | Cellular_org | Segniliparus rugosus                                                    |
| 1 | Cellular_org | Selenomonas flueggei ATCC 43531                                         |
| 1 | Cellular_org | Selenomonas noxia ATCC 43541                                            |
| 1 | Cellular_org | Selenomonas ruminantium                                                 |
| 1 | Cellular_org | Selenomonas sp. oral taxon 149 str. 67H29BP                             |
| 1 | Cellular_org | Selenomonas sputigena ATCC 35185                                        |
| 1 | Cellular_org | Serratia entomophila                                                    |
| 1 | Cellular_org | Serratia marcescens                                                     |
| 1 | Cellular_org | Serratia odorifera                                                      |
| 1 | Cellular_org | Serratia odorifera 4Rx13                                                |
| 1 | Cellular_org | Serratia odorifera DSM 4582                                             |
| 1 | Cellular_org | Serratia proteamaculans                                                 |
| 1 | Cellular_org | Serratia proteamaculans 568                                             |
| 1 | Cellular_org | Shewanella amazonensis SB2B                                             |
| 1 | Cellular_org | Shewanella baltica                                                      |
| 1 | Cellular_org | Shewanella baltica BA175                                                |
| 1 | Cellular_org | Shewanella baltica OS155                                                |
| 1 | Cellular_org | Shewanella baltica OS183                                                |
| 1 | Cellular_org | Shewanella baltica OS185                                                |
| 1 | Cellular_org | Shewanella baltica OS195                                                |
| 1 | Cellular_org | Shewanella baltica OS223                                                |

|   |              |                                    |
|---|--------------|------------------------------------|
| 1 | Cellular_org | Shewanella benthica                |
| 1 | Cellular_org | Shewanella benthica KT99           |
| 1 | Cellular_org | Shewanella denitrificans OS217     |
| 1 | Cellular_org | Shewanella frigidimarina           |
| 1 | Cellular_org | Shewanella frigidimarina NCIMB 400 |
| 1 | Cellular_org | Shewanella halifaxensis HAW-EB4    |
| 1 | Cellular_org | Shewanella loihica PV-4            |
| 1 | Cellular_org | Shewanella oneidensis              |
| 1 | Cellular_org | Shewanella oneidensis MR-1         |
| 1 | Cellular_org | Shewanella pealeana                |
| 1 | Cellular_org | Shewanella pealeana ATCC 700345    |
| 1 | Cellular_org | Shewanella piezotolerans WP3       |
| 1 | Cellular_org | Shewanella putrefaciens            |
| 1 | Cellular_org | Shewanella putrefaciens CN-32      |
| 1 | Cellular_org | Shewanella sediminis               |
| 1 | Cellular_org | Shewanella sediminis HAW-EB3       |
| 1 | Cellular_org | Shewanella sp. 33B                 |
| 1 | Cellular_org | Shewanella sp. ANA-3               |
| 1 | Cellular_org | Shewanella sp. MR-4                |
| 1 | Cellular_org | Shewanella sp. MR-7                |
| 1 | Cellular_org | Shewanella sp. W3-18-1             |
| 1 | Cellular_org | Shewanella violacea                |
| 1 | Cellular_org | Shewanella violacea DSS12          |
| 1 | Cellular_org | Shewanella woodyi                  |
| 1 | Cellular_org | Shewanella woodyi ATCC 51908       |
| 1 | Cellular_org | Shigella boydii                    |
| 1 | Cellular_org | Shigella boydii CDC 3083-94        |
| 1 | Cellular_org | Shigella boydii Sb227              |
| 1 | Cellular_org | Shigella dysenteriae               |
| 1 | Cellular_org | Shigella dysenteriae 1012          |
| 1 | Cellular_org | Shigella dysenteriae 1617          |
| 1 | Cellular_org | Shigella dysenteriae Sd197         |
| 1 | Cellular_org | Shigella flexneri                  |
| 1 | Cellular_org | Shigella flexneri 2a               |
| 1 | Cellular_org | Shigella flexneri 2a str. 2457T    |
| 1 | Cellular_org | Shigella flexneri 2a str. 301      |
| 1 | Cellular_org | Shigella flexneri 5                |
| 1 | Cellular_org | Shigella flexneri 5 str. 8401      |
| 1 | Cellular_org | Shigella flexneri 5a               |
| 1 | Cellular_org | Shigella sonnei                    |
| 1 | Cellular_org | Shigella sonnei Ss046              |
| 1 | Cellular_org | Shigella sp. D9                    |
| 1 | Cellular_org | Shuttleworthia satelles DSM 14600  |



|   |              |                                          |
|---|--------------|------------------------------------------|
| 1 | Cellular_org | Sideroxydans lithotrophicus ES-1         |
| 1 | Cellular_org | Silicibacter lacuscaerulensis ITI-1157   |
| 1 | Cellular_org | Silicibacter sp. TrichCH4B               |
| 1 | Cellular_org | Simonsiella muelleri ATCC 29453          |
| 1 | Cellular_org | Sinorhizobium fredii                     |
| 1 | Cellular_org | Sinorhizobium medicae                    |
| 1 | Cellular_org | Sinorhizobium medicae WSM419             |
| 1 | Cellular_org | Sinorhizobium meliloti                   |
| 1 | Cellular_org | Sinorhizobium meliloti 1021              |
| 1 | Cellular_org | Sinorhizobium meliloti AK83              |
| 1 | Cellular_org | Sinorhizobium meliloti BL225C            |
| 1 | Cellular_org | Sinorhizobium meliloti SM11              |
| 1 | Cellular_org | Slackia exigua ATCC 700122               |
| 1 | Cellular_org | Slackia heliotrinireducens DSM 20476     |
| 1 | Cellular_org | Sodalis glossinidius                     |
| 1 | Cellular_org | Sodalis glossinidius str. 'morsitans'    |
| 1 | Cellular_org | Sorangium cellulosum                     |
| 1 | Cellular_org | Sorangium cellulosum 'So ce 56'          |
| 1 | Cellular_org | Sphaerobacter thermophilus DSM 20745     |
| 1 | Cellular_org | Sphingobacterium spiritivorum            |
| 1 | Cellular_org | Sphingobacterium spiritivorum ATCC 33300 |
| 1 | Cellular_org | Sphingobacterium spiritivorum ATCC 33861 |
| 1 | Cellular_org | Sphingobium chlorophenolicum             |
| 1 | Cellular_org | Sphingobium chlorophenolicum L-1         |
| 1 | Cellular_org | Sphingobium japonicum                    |
| 1 | Cellular_org | Sphingobium japonicum UT26S              |
| 1 | Cellular_org | Sphingobium xenophagum                   |
| 1 | Cellular_org | Sphingobium yanoikuyae                   |
| 1 | Cellular_org | Sphingomonas sp. A1                      |
| 1 | Cellular_org | Sphingomonas sp. KA1                     |
| 1 | Cellular_org | Sphingomonas sp. MM-1                    |
| 1 | Cellular_org | Sphingomonas sp. SKA58                   |
| 1 | Cellular_org | Sphingomonas wittichii RW1               |
| 1 | Cellular_org | Sphingopyxis alaskensis RB2256           |
| 1 | Cellular_org | Sphingopyxis macrogoltabida              |
| 1 | Cellular_org | Spirochaeta smaragdinae DSM 11293        |
| 1 | Cellular_org | Spirochaeta thermophila                  |
| 1 | Cellular_org | Spirochaeta thermophila DSM 6192         |
| 1 | Cellular_org | Spiroplasma citri                        |
| 1 | Cellular_org | Spiroplasma kunkelii                     |
| 1 | Cellular_org | Spiroplasma kunkelii CR2-3x              |
| 1 | Cellular_org | Spirosoma linguale DSM 74                |
| 1 | Cellular_org | Sporosarcina ureae                       |

|   |              |                                                 |
|---|--------------|-------------------------------------------------|
| 1 | Cellular_org | Stackebrandtia nassauensis DSM 44728            |
| 1 | Cellular_org | Staphylococcus aureus                           |
| 1 | Cellular_org | Staphylococcus aureus 930918-3                  |
| 1 | Cellular_org | Staphylococcus aureus A10102                    |
| 1 | Cellular_org | Staphylococcus aureus A5937                     |
| 1 | Cellular_org | Staphylococcus aureus A5948                     |
| 1 | Cellular_org | Staphylococcus aureus A6224                     |
| 1 | Cellular_org | Staphylococcus aureus A6300                     |
| 1 | Cellular_org | Staphylococcus aureus A8115                     |
| 1 | Cellular_org | Staphylococcus aureus A8117                     |
| 1 | Cellular_org | Staphylococcus aureus A8796                     |
| 1 | Cellular_org | Staphylococcus aureus A8819                     |
| 1 | Cellular_org | Staphylococcus aureus A9299                     |
| 1 | Cellular_org | Staphylococcus aureus A9635                     |
| 1 | Cellular_org | Staphylococcus aureus A9719                     |
| 1 | Cellular_org | Staphylococcus aureus A9754                     |
| 1 | Cellular_org | Staphylococcus aureus A9763                     |
| 1 | Cellular_org | Staphylococcus aureus A9765                     |
| 1 | Cellular_org | Staphylococcus aureus A9781                     |
| 1 | Cellular_org | Staphylococcus aureus D30                       |
| 1 | Cellular_org | Staphylococcus aureus RF122                     |
| 1 | Cellular_org | Staphylococcus aureus subsp. aureus             |
| 1 | Cellular_org | Staphylococcus aureus subsp. aureus 132         |
| 1 | Cellular_org | Staphylococcus aureus subsp. aureus 55/2053     |
| 1 | Cellular_org | Staphylococcus aureus subsp. aureus 58-424      |
| 1 | Cellular_org | Staphylococcus aureus subsp. aureus 65-1322     |
| 1 | Cellular_org | Staphylococcus aureus subsp. aureus 68-397      |
| 1 | Cellular_org | Staphylococcus aureus subsp. aureus A017934/97  |
| 1 | Cellular_org | Staphylococcus aureus subsp. aureus ATCC 51811  |
| 1 | Cellular_org | Staphylococcus aureus subsp. aureus ATCC BAA-39 |
| 1 | Cellular_org | Staphylococcus aureus subsp. aureus Btn1260     |
| 1 | Cellular_org | Staphylococcus aureus subsp. aureus C101        |
| 1 | Cellular_org | Staphylococcus aureus subsp. aureus C160        |
| 1 | Cellular_org | Staphylococcus aureus subsp. aureus C427        |
| 1 | Cellular_org | Staphylococcus aureus subsp. aureus COL         |
| 1 | Cellular_org | Staphylococcus aureus subsp. aureus D139        |
| 1 | Cellular_org | Staphylococcus aureus subsp. aureus E1410       |
| 1 | Cellular_org | Staphylococcus aureus subsp. aureus ED98        |
| 1 | Cellular_org | Staphylococcus aureus subsp. aureus EMRSA16     |
| 1 | Cellular_org | Staphylococcus aureus subsp. aureus H19         |
| 1 | Cellular_org | Staphylococcus aureus subsp. aureus JH1         |
| 1 | Cellular_org | Staphylococcus aureus subsp. aureus JH9         |
| 1 | Cellular_org | Staphylococcus aureus subsp. aureus M1015       |

|   |              |                                                       |
|---|--------------|-------------------------------------------------------|
| 1 | Cellular_org | Staphylococcus aureus subsp. aureus M809              |
| 1 | Cellular_org | Staphylococcus aureus subsp. aureus M876              |
| 1 | Cellular_org | Staphylococcus aureus subsp. aureus M899              |
| 1 | Cellular_org | Staphylococcus aureus subsp. aureus MN8               |
| 1 | Cellular_org | Staphylococcus aureus subsp. aureus MR1               |
| 1 | Cellular_org | Staphylococcus aureus subsp. aureus MRSA252           |
| 1 | Cellular_org | Staphylococcus aureus subsp. aureus MSSA476           |
| 1 | Cellular_org | Staphylococcus aureus subsp. aureus MW2               |
| 1 | Cellular_org | Staphylococcus aureus subsp. aureus Mu3               |
| 1 | Cellular_org | Staphylococcus aureus subsp. aureus Mu50              |
| 1 | Cellular_org | Staphylococcus aureus subsp. aureus Mu50-omega        |
| 1 | Cellular_org | Staphylococcus aureus subsp. aureus N315              |
| 1 | Cellular_org | Staphylococcus aureus subsp. aureus NCTC 8325         |
| 1 | Cellular_org | Staphylococcus aureus subsp. aureus ST398             |
| 1 | Cellular_org | Staphylococcus aureus subsp. aureus TCH130            |
| 1 | Cellular_org | Staphylococcus aureus subsp. aureus TCH70             |
| 1 | Cellular_org | Staphylococcus aureus subsp. aureus USA300_FPR3757    |
| 1 | Cellular_org | Staphylococcus aureus subsp. aureus USA300_TCH1516    |
| 1 | Cellular_org | Staphylococcus aureus subsp. aureus USA300_TCH959     |
| 1 | Cellular_org | Staphylococcus aureus subsp. aureus WBG10049          |
| 1 | Cellular_org | Staphylococcus aureus subsp. aureus WW2703/97         |
| 1 | Cellular_org | Staphylococcus aureus subsp. aureus str. CF-Marseille |
| 1 | Cellular_org | Staphylococcus aureus subsp. aureus str. JKD6009      |
| 1 | Cellular_org | Staphylococcus aureus subsp. aureus str. Newman       |
| 1 | Cellular_org | Staphylococcus capitis                                |
| 1 | Cellular_org | Staphylococcus capitis SK14                           |
| 1 | Cellular_org | Staphylococcus caprae                                 |
| 1 | Cellular_org | Staphylococcus carnosus                               |
| 1 | Cellular_org | Staphylococcus carnosus subsp. carnosus               |
| 1 | Cellular_org | Staphylococcus carnosus subsp. carnosus TM300         |
| 1 | Cellular_org | Staphylococcus chromogenes                            |
| 1 | Cellular_org | Staphylococcus epidermidis                            |
| 1 | Cellular_org | Staphylococcus epidermidis ATCC 12228                 |
| 1 | Cellular_org | Staphylococcus epidermidis BCM-HMP0060                |
| 1 | Cellular_org | Staphylococcus epidermidis M23864:W1                  |
| 1 | Cellular_org | Staphylococcus epidermidis M23864:W2(grey)            |
| 1 | Cellular_org | Staphylococcus epidermidis RP62A                      |
| 1 | Cellular_org | Staphylococcus epidermidis SK135                      |
| 1 | Cellular_org | Staphylococcus epidermidis W23144                     |
| 1 | Cellular_org | Staphylococcus haemolyticus                           |
| 1 | Cellular_org | Staphylococcus haemolyticus JCSC1435                  |
| 1 | Cellular_org | Staphylococcus hominis                                |
| 1 | Cellular_org | Staphylococcus hominis SK119                          |

|   |              |                                                              |
|---|--------------|--------------------------------------------------------------|
| 1 | Cellular_org | Staphylococcus hominis subsp. hominis                        |
| 1 | Cellular_org | Staphylococcus lentus                                        |
| 1 | Cellular_org | Staphylococcus lugdunensis                                   |
| 1 | Cellular_org | Staphylococcus lugdunensis HKU09-01                          |
| 1 | Cellular_org | Staphylococcus pasteurii                                     |
| 1 | Cellular_org | Staphylococcus pseudintermedius                              |
| 1 | Cellular_org | Staphylococcus saprophyticus                                 |
| 1 | Cellular_org | Staphylococcus saprophyticus subsp. saprophyticus            |
| 1 | Cellular_org | Staphylococcus saprophyticus subsp. saprophyticus ATCC 15305 |
| 1 | Cellular_org | Staphylococcus sciuri                                        |
| 1 | Cellular_org | Staphylococcus sciuri subsp. sciuri                          |
| 1 | Cellular_org | Staphylococcus simulans                                      |
| 1 | Cellular_org | Staphylococcus simulans bv. staphylolyticus                  |
| 1 | Cellular_org | Staphylococcus sp. 693-2                                     |
| 1 | Cellular_org | Staphylococcus warneri                                       |
| 1 | Cellular_org | Staphylococcus warneri L37603                                |
| 1 | Cellular_org | Starkeya novella DSM 506                                     |
| 1 | Cellular_org | Stenotrophomonas maltophilia                                 |
| 1 | Cellular_org | Stenotrophomonas maltophilia K279a                           |
| 1 | Cellular_org | Stenotrophomonas maltophilia R551-3                          |
| 1 | Cellular_org | Stenotrophomonas sp. SKA14                                   |
| 1 | Cellular_org | Stigmatella aurantiaca                                       |
| 1 | Cellular_org | Stigmatella aurantiaca DW4/3-1                               |
| 1 | Cellular_org | Streptobacillus moniliformis                                 |
| 1 | Cellular_org | Streptobacillus moniliformis DSM 12112                       |
| 1 | Cellular_org | Streptococcus                                                |
| 1 | Cellular_org | Streptococcus agalactiae                                     |
| 1 | Cellular_org | Streptococcus agalactiae 18RS21                              |
| 1 | Cellular_org | Streptococcus agalactiae 2603V/R                             |
| 1 | Cellular_org | Streptococcus agalactiae 515                                 |
| 1 | Cellular_org | Streptococcus agalactiae A909                                |
| 1 | Cellular_org | Streptococcus agalactiae CJB111                              |
| 1 | Cellular_org | Streptococcus agalactiae COH1                                |
| 1 | Cellular_org | Streptococcus agalactiae H36B                                |
| 1 | Cellular_org | Streptococcus agalactiae NEM316                              |
| 1 | Cellular_org | Streptococcus agalactiae serogroup III                       |
| 1 | Cellular_org | Streptococcus anginosus                                      |
| 1 | Cellular_org | Streptococcus australis                                      |
| 1 | Cellular_org | Streptococcus bovis ATCC 700338                              |
| 1 | Cellular_org | Streptococcus cristatus                                      |
| 1 | Cellular_org | Streptococcus cristatus ATCC 51100                           |
| 1 | Cellular_org | Streptococcus downei                                         |

|   |              |                                                           |
|---|--------------|-----------------------------------------------------------|
| 1 | Cellular_org | Streptococcus dysgalactiae                                |
| 1 | Cellular_org | Streptococcus dysgalactiae subsp. equisimilis             |
| 1 | Cellular_org | Streptococcus dysgalactiae subsp. equisimilis GGS_124     |
| 1 | Cellular_org | Streptococcus equi                                        |
| 1 | Cellular_org | Streptococcus equi subsp. equi                            |
| 1 | Cellular_org | Streptococcus equi subsp. equi 4047                       |
| 1 | Cellular_org | Streptococcus equi subsp. zooepidemicus                   |
| 1 | Cellular_org | Streptococcus equi subsp. zooepidemicus MGCS10565         |
| 1 | Cellular_org | Streptococcus equinus                                     |
| 1 | Cellular_org | Streptococcus gallolyticus                                |
| 1 | Cellular_org | Streptococcus gallolyticus UCN34                          |
| 1 | Cellular_org | Streptococcus gallolyticus subsp. gallolyticus            |
| 1 | Cellular_org | Streptococcus gallolyticus subsp. gallolyticus TX20005    |
| 1 | Cellular_org | Streptococcus gordonii                                    |
| 1 | Cellular_org | Streptococcus gordonii str. Challis                       |
| 1 | Cellular_org | Streptococcus gordonii str. Challis substr. CH1           |
| 1 | Cellular_org | Streptococcus infantarius                                 |
| 1 | Cellular_org | Streptococcus infantarius subsp. infantarius              |
| 1 | Cellular_org | Streptococcus infantarius subsp. infantarius ATCC BAA-102 |
| 1 | Cellular_org | Streptococcus infantis                                    |
| 1 | Cellular_org | Streptococcus infantis ATCC 700779                        |
| 1 | Cellular_org | Streptococcus infantis SK1302                             |
| 1 | Cellular_org | Streptococcus mitis                                       |
| 1 | Cellular_org | Streptococcus mitis ATCC 6249                             |
| 1 | Cellular_org | Streptococcus mitis B6                                    |
| 1 | Cellular_org | Streptococcus mitis NCTC 12261                            |
| 1 | Cellular_org | Streptococcus mitis SK321                                 |
| 1 | Cellular_org | Streptococcus mitis SK564                                 |
| 1 | Cellular_org | Streptococcus mitis SK597                                 |
| 1 | Cellular_org | Streptococcus mutans                                      |
| 1 | Cellular_org | Streptococcus mutans NN2025                               |
| 1 | Cellular_org | Streptococcus mutans UA159                                |
| 1 | Cellular_org | Streptococcus oralis                                      |
| 1 | Cellular_org | Streptococcus oralis ATCC 35037                           |
| 1 | Cellular_org | Streptococcus parasanguinis                               |
| 1 | Cellular_org | Streptococcus parasanguinis ATCC 15912                    |
| 1 | Cellular_org | Streptococcus peroris                                     |
| 1 | Cellular_org | Streptococcus peroris ATCC 700780                         |
| 1 | Cellular_org | Streptococcus pneumoniae                                  |
| 1 | Cellular_org | Streptococcus pneumoniae 670-6B                           |
| 1 | Cellular_org | Streptococcus pneumoniae 70585                            |
| 1 | Cellular_org | Streptococcus pneumoniae AP200                            |

|   |              |                                              |
|---|--------------|----------------------------------------------|
| 1 | Cellular_org | Streptococcus pneumoniae ATCC 700669         |
| 1 | Cellular_org | Streptococcus pneumoniae BS397               |
| 1 | Cellular_org | Streptococcus pneumoniae BS455               |
| 1 | Cellular_org | Streptococcus pneumoniae BS457               |
| 1 | Cellular_org | Streptococcus pneumoniae BS458               |
| 1 | Cellular_org | Streptococcus pneumoniae CCRI 1974           |
| 1 | Cellular_org | Streptococcus pneumoniae CCRI 1974M2         |
| 1 | Cellular_org | Streptococcus pneumoniae CDC0288-04          |
| 1 | Cellular_org | Streptococcus pneumoniae CDC1087-00          |
| 1 | Cellular_org | Streptococcus pneumoniae CDC1873-00          |
| 1 | Cellular_org | Streptococcus pneumoniae CDC3059-06          |
| 1 | Cellular_org | Streptococcus pneumoniae CGSP14              |
| 1 | Cellular_org | Streptococcus pneumoniae D39                 |
| 1 | Cellular_org | Streptococcus pneumoniae G54                 |
| 1 | Cellular_org | Streptococcus pneumoniae Hungary19A-6        |
| 1 | Cellular_org | Streptococcus pneumoniae JJA                 |
| 1 | Cellular_org | Streptococcus pneumoniae MLV-016             |
| 1 | Cellular_org | Streptococcus pneumoniae P1031               |
| 1 | Cellular_org | Streptococcus pneumoniae R6                  |
| 1 | Cellular_org | Streptococcus pneumoniae SP-BS293            |
| 1 | Cellular_org | Streptococcus pneumoniae SP11-BS70           |
| 1 | Cellular_org | Streptococcus pneumoniae SP14-BS292          |
| 1 | Cellular_org | Streptococcus pneumoniae SP14-BS69           |
| 1 | Cellular_org | Streptococcus pneumoniae SP18-BS74           |
| 1 | Cellular_org | Streptococcus pneumoniae SP19-BS75           |
| 1 | Cellular_org | Streptococcus pneumoniae SP195               |
| 1 | Cellular_org | Streptococcus pneumoniae SP23-BS72           |
| 1 | Cellular_org | Streptococcus pneumoniae SP3-BS71            |
| 1 | Cellular_org | Streptococcus pneumoniae SP6-BS73            |
| 1 | Cellular_org | Streptococcus pneumoniae SP9-BS68            |
| 1 | Cellular_org | Streptococcus pneumoniae TCH8431/19A         |
| 1 | Cellular_org | Streptococcus pneumoniae TIGR4               |
| 1 | Cellular_org | Streptococcus pneumoniae Taiwan19F-14        |
| 1 | Cellular_org | Streptococcus pneumoniae str. Canada MDR_19A |
| 1 | Cellular_org | Streptococcus pneumoniae str. Canada MDR_19F |
| 1 | Cellular_org | Streptococcus pyogenes                       |
| 1 | Cellular_org | Streptococcus pyogenes ATCC 10782            |
| 1 | Cellular_org | Streptococcus pyogenes M1 GAS                |
| 1 | Cellular_org | Streptococcus pyogenes M49 591               |
| 1 | Cellular_org | Streptococcus pyogenes MGAS10270             |
| 1 | Cellular_org | Streptococcus pyogenes MGAS10394             |
| 1 | Cellular_org | Streptococcus pyogenes MGAS10750             |
| 1 | Cellular_org | Streptococcus pyogenes MGAS2096              |

|   |              |                                               |
|---|--------------|-----------------------------------------------|
| 1 | Cellular_org | Streptococcus pyogenes MGAS315                |
| 1 | Cellular_org | Streptococcus pyogenes MGAS5005               |
| 1 | Cellular_org | Streptococcus pyogenes MGAS6180               |
| 1 | Cellular_org | Streptococcus pyogenes MGAS8232               |
| 1 | Cellular_org | Streptococcus pyogenes MGAS9429               |
| 1 | Cellular_org | Streptococcus pyogenes NZ131                  |
| 1 | Cellular_org | Streptococcus pyogenes SSI-1                  |
| 1 | Cellular_org | Streptococcus pyogenes serotype M12           |
| 1 | Cellular_org | Streptococcus pyogenes serotype M3            |
| 1 | Cellular_org | Streptococcus pyogenes serotype M5            |
| 1 | Cellular_org | Streptococcus pyogenes serotype M6            |
| 1 | Cellular_org | Streptococcus pyogenes str. Manfredo          |
| 1 | Cellular_org | Streptococcus salivarius                      |
| 1 | Cellular_org | Streptococcus salivarius SK126                |
| 1 | Cellular_org | Streptococcus sanguinis                       |
| 1 | Cellular_org | Streptococcus sanguinis SK36                  |
| 1 | Cellular_org | Streptococcus sp. 2_1_36FAA                   |
| 1 | Cellular_org | Streptococcus sp. C150                        |
| 1 | Cellular_org | Streptococcus sp. C300                        |
| 1 | Cellular_org | Streptococcus sp. M143                        |
| 1 | Cellular_org | Streptococcus sp. oral taxon 071 str. 73H25AP |
| 1 | Cellular_org | Streptococcus suis                            |
| 1 | Cellular_org | Streptococcus suis 05HAS68                    |
| 1 | Cellular_org | Streptococcus suis 05ZYH33                    |
| 1 | Cellular_org | Streptococcus suis 89/1591                    |
| 1 | Cellular_org | Streptococcus suis 98HAH33                    |
| 1 | Cellular_org | Streptococcus suis BM407                      |
| 1 | Cellular_org | Streptococcus suis P1/7                       |
| 1 | Cellular_org | Streptococcus suis SC84                       |
| 1 | Cellular_org | Streptococcus thermophilus                    |
| 1 | Cellular_org | Streptococcus thermophilus CNRZ1066           |
| 1 | Cellular_org | Streptococcus thermophilus LMD-9              |
| 1 | Cellular_org | Streptococcus thermophilus LMG 18311          |
| 1 | Cellular_org | Streptococcus uberis                          |
| 1 | Cellular_org | Streptococcus uberis 0140J                    |
| 1 | Cellular_org | Streptococcus vestibularis                    |
| 1 | Cellular_org | Streptococcus vestibularis ATCC 49124         |
| 1 | Cellular_org | Streptomyces albus                            |
| 1 | Cellular_org | Streptomyces albus                            |
| 1 | Cellular_org | Streptomyces albus J1074                      |
| 1 | Cellular_org | Streptomyces avermitilis                      |
| 1 | Cellular_org | Streptomyces avermitilis MA-4680              |
| 1 | Cellular_org | Streptomyces clavuligerus                     |

|   |              |                                                |
|---|--------------|------------------------------------------------|
| 1 | Cellular_org | Streptomyces clavuligerus ATCC 27064           |
| 1 | Cellular_org | Streptomyces coelicolor                        |
| 1 | Cellular_org | Streptomyces coelicolor A3(2)                  |
| 1 | Cellular_org | Streptomyces cyaneus                           |
| 1 | Cellular_org | Streptomyces filamentosus                      |
| 1 | Cellular_org | Streptomyces flavovirens                       |
| 1 | Cellular_org | Streptomyces ghanaensis                        |
| 1 | Cellular_org | Streptomyces ghanaensis ATCC 14672             |
| 1 | Cellular_org | Streptomyces griseoflavus                      |
| 1 | Cellular_org | Streptomyces griseoflavus Tu4000               |
| 1 | Cellular_org | Streptomyces griseus                           |
| 1 | Cellular_org | Streptomyces griseus subsp. griseus            |
| 1 | Cellular_org | Streptomyces griseus subsp. griseus NBRC 13350 |
| 1 | Cellular_org | Streptomyces hygroscopicus                     |
| 1 | Cellular_org | Streptomyces hygroscopicus ATCC 53653          |
| 1 | Cellular_org | Streptomyces laurentii                         |
| 1 | Cellular_org | Streptomyces lavendulae                        |
| 1 | Cellular_org | Streptomyces lividans                          |
| 1 | Cellular_org | Streptomyces lividans TK24                     |
| 1 | Cellular_org | Streptomyces natalensis                        |
| 1 | Cellular_org | Streptomyces phaeochromogenes                  |
| 1 | Cellular_org | Streptomyces pristinaespiralis                 |
| 1 | Cellular_org | Streptomyces pristinaespiralis ATCC 25486      |
| 1 | Cellular_org | Streptomyces rochei                            |
| 1 | Cellular_org | Streptomyces roseosporus NRRL 11379            |
| 1 | Cellular_org | Streptomyces roseosporus NRRL 15998            |
| 1 | Cellular_org | Streptomyces scabiei                           |
| 1 | Cellular_org | Streptomyces scabiei 87.22                     |
| 1 | Cellular_org | Streptomyces sp. 44030                         |
| 1 | Cellular_org | Streptomyces sp. 44414                         |
| 1 | Cellular_org | Streptomyces sp. AA4                           |
| 1 | Cellular_org | Streptomyces sp. ACT-1                         |
| 1 | Cellular_org | Streptomyces sp. ACTE                          |
| 1 | Cellular_org | Streptomyces sp. C                             |
| 1 | Cellular_org | Streptomyces sp. EN27                          |
| 1 | Cellular_org | Streptomyces sp. F11                           |
| 1 | Cellular_org | Streptomyces sp. FQ1                           |
| 1 | Cellular_org | Streptomyces sp. FR1                           |
| 1 | Cellular_org | Streptomyces sp. HK1                           |
| 1 | Cellular_org | Streptomyces sp. Mg1                           |
| 1 | Cellular_org | Streptomyces sp. SPB74                         |
| 1 | Cellular_org | Streptomyces sp. SPB78                         |
| 1 | Cellular_org | Streptomyces sp. W9                            |



|   |              |                                          |
|---|--------------|------------------------------------------|
| 1 | Cellular_org | Streptomyces sp. Y27                     |
| 1 | Cellular_org | Streptomyces sp. ZL12                    |
| 1 | Cellular_org | Streptomyces sp. e14                     |
| 1 | Cellular_org | Streptomyces sp. x3                      |
| 1 | Cellular_org | Streptomyces sviveus ATCC 29083          |
| 1 | Cellular_org | Streptomyces venezuelae                  |
| 1 | Cellular_org | Streptomyces violaceoruber               |
| 1 | Cellular_org | Streptomyces violaceusniger              |
| 1 | Cellular_org | Streptomyces violaceusniger Tu 4113      |
| 1 | Cellular_org | Streptomyces viridochromogenes           |
| 1 | Cellular_org | Streptomyces viridochromogenes DSM 40736 |
| 1 | Cellular_org | Streptosporangium roseum                 |
| 1 | Cellular_org | Streptosporangium roseum DSM 43021       |
| 1 | Cellular_org | Subdoligranulum variabile DSM 15176      |
| 1 | Cellular_org | Sulfitobacter sp. EE-36                  |
| 1 | Cellular_org | Sulfitobacter sp. NAS-14.1               |
| 1 | Cellular_org | Sulfurihydrogenibium azorense            |
| 1 | Cellular_org | Sulfurihydrogenibium azorense Az-Fu1     |
| 1 | Cellular_org | Sulfurihydrogenibium sp. YO3AOP1         |
| 1 | Cellular_org | Sulfurihydrogenibium yellowstonense      |
| 1 | Cellular_org | Sulfurihydrogenibium yellowstonense SS-5 |
| 1 | Cellular_org | Sulfurimonas autotrophica                |
| 1 | Cellular_org | Sulfurimonas autotrophica DSM 16294      |
| 1 | Cellular_org | Sulfurimonas denitrificans               |
| 1 | Cellular_org | Sulfurimonas denitrificans DSM 1251      |
| 1 | Cellular_org | Sulfurospirillum deleyianum              |
| 1 | Cellular_org | Sulfurospirillum deleyianum DSM 6946     |
| 1 | Cellular_org | Sulfurovum sp. NBC37-1                   |
| 1 | Cellular_org | Symbiobacterium thermophilum             |
| 1 | Cellular_org | Symbiobacterium thermophilum IAM 14863   |
| 1 | Cellular_org | Synechococcus                            |
| 1 | Cellular_org | Synechococcus elongatus                  |
| 1 | Cellular_org | Synechococcus elongatus PCC 6301         |
| 1 | Cellular_org | Synechococcus elongatus PCC 7942         |
| 1 | Cellular_org | Synechococcus sp.                        |
| 1 | Cellular_org | Synechococcus sp. BL107                  |
| 1 | Cellular_org | Synechococcus sp. CB0101                 |
| 1 | Cellular_org | Synechococcus sp. CB0205                 |
| 1 | Cellular_org | Synechococcus sp. CC9311                 |
| 1 | Cellular_org | Synechococcus sp. CC9605                 |
| 1 | Cellular_org | Synechococcus sp. CC9902                 |
| 1 | Cellular_org | Synechococcus sp. JA-2-3B'a(2-13)        |
| 1 | Cellular_org | Synechococcus sp. JA-3-3Ab               |

|   |              |                                                       |
|---|--------------|-------------------------------------------------------|
| 1 | Cellular_org | Synechococcus sp. PCC 7002                            |
| 1 | Cellular_org | Synechococcus sp. PCC 7335                            |
| 1 | Cellular_org | Synechococcus sp. RCC307                              |
| 1 | Cellular_org | Synechococcus sp. RS9916                              |
| 1 | Cellular_org | Synechococcus sp. RS9917                              |
| 1 | Cellular_org | Synechococcus sp. WH 5701                             |
| 1 | Cellular_org | Synechococcus sp. WH 7803                             |
| 1 | Cellular_org | Synechococcus sp. WH 7805                             |
| 1 | Cellular_org | Synechococcus sp. WH 8102                             |
| 1 | Cellular_org | Synechococcus sp. WH 8109                             |
| 1 | Cellular_org | Synechocystis                                         |
| 1 | Cellular_org | Synechocystis sp. PCC 6803                            |
| 1 | Cellular_org | Syntrophobacter fumaroxidans MPOB                     |
| 1 | Cellular_org | Syntrophomonas wolfei subsp. wolfei                   |
| 1 | Cellular_org | Syntrophomonas wolfei subsp. wolfei str. Goettingen   |
| 1 | Cellular_org | Syntrophothermus lipocalidus DSM 12680                |
| 1 | Cellular_org | Syntrophus aciditrophicus SB                          |
| 1 | Cellular_org | Teredinibacter turnerae                               |
| 1 | Cellular_org | Teredinibacter turnerae T7901                         |
| 1 | Cellular_org | Tetragenococcus halophilus                            |
| 1 | Cellular_org | Thalassibium sp. R2A62                                |
| 1 | Cellular_org | Thauera sp. MZ1T                                      |
| 1 | Cellular_org | Thermaerobacter marianensis DSM 12885                 |
| 1 | Cellular_org | Thermanaerovibrio acidaminovorans DSM 6589            |
| 1 | Cellular_org | Thermincola potens JR                                 |
| 1 | Cellular_org | Thermoanaerobacter brockii                            |
| 1 | Cellular_org | Thermoanaerobacter brockii subsp. finii Ako-1         |
| 1 | Cellular_org | Thermoanaerobacter ethanolicus                        |
| 1 | Cellular_org | Thermoanaerobacter ethanolicus CCSD1                  |
| 1 | Cellular_org | Thermoanaerobacter italicus Ab9                       |
| 1 | Cellular_org | Thermoanaerobacter mathranii                          |
| 1 | Cellular_org | Thermoanaerobacter mathranii subsp. mathranii str. A3 |
| 1 | Cellular_org | Thermoanaerobacter pseudethanolicus ATCC 33223        |
| 1 | Cellular_org | Thermoanaerobacter sp. X513                           |
| 1 | Cellular_org | Thermoanaerobacter sp. X514                           |
| 1 | Cellular_org | Thermoanaerobacter sp. X561                           |
| 1 | Cellular_org | Thermoanaerobacter tengcongensis MB4                  |
| 1 | Cellular_org | Thermoanaerobacter wiegelii Rt8.B1                    |
| 1 | Cellular_org | Thermoanaerobacterium thermosaccharolyticum           |
| 1 | Cellular_org | Thermoanaerobacterium thermosaccharolyticum DSM 571   |
| 1 | Cellular_org | Thermoanaerobacterium xylanolyticum LX-11             |
| 1 | Cellular_org | Thermobaculum terrenum ATCC BAA-798                   |

|   |              |                                            |
|---|--------------|--------------------------------------------|
| 1 | Cellular_org | Thermobifida fusca                         |
| 1 | Cellular_org | Thermobifida fusca YX                      |
| 1 | Cellular_org | Thermobispora bispora                      |
| 1 | Cellular_org | Thermobispora bispora DSM 43833            |
| 1 | Cellular_org | Thermocrinis albus DSM 14484               |
| 1 | Cellular_org | Thermodesulfovibrio yellowstonii           |
| 1 | Cellular_org | Thermodesulfovibrio yellowstonii DSM 11347 |
| 1 | Cellular_org | Thermomicrobium roseum                     |
| 1 | Cellular_org | Thermomicrobium roseum DSM 5159            |
| 1 | Cellular_org | Thermomonospora curvata                    |
| 1 | Cellular_org | Thermomonospora curvata DSM 43183          |
| 1 | Cellular_org | Thermosediminibacter oceani DSM 16646      |
| 1 | Cellular_org | Thermosinus carboxydivorans Nor1           |
| 1 | Cellular_org | Thermosipho africanus TCF52B               |
| 1 | Cellular_org | Thermosipho melanesiensis BI429            |
| 1 | Cellular_org | Thermosynechococcus elongatus              |
| 1 | Cellular_org | Thermosynechococcus elongatus BP-1         |
| 1 | Cellular_org | Thermotoga lettingae TMO                   |
| 1 | Cellular_org | Thermotoga maritima                        |
| 1 | Cellular_org | Thermotoga maritima MSB8                   |
| 1 | Cellular_org | Thermotoga naphthophila                    |
| 1 | Cellular_org | Thermotoga naphthophila RKU-10             |
| 1 | Cellular_org | Thermotoga neapolitana                     |
| 1 | Cellular_org | Thermotoga neapolitana DSM 4359            |
| 1 | Cellular_org | Thermotoga petrophila                      |
| 1 | Cellular_org | Thermotoga petrophila RKU-1                |
| 1 | Cellular_org | Thermotoga sp. RQ2                         |
| 1 | Cellular_org | Thermotogales bacterium mesG1.Ag.4.2       |
| 1 | Cellular_org | Thermovibrio ammonificans                  |
| 1 | Cellular_org | Thermus aquaticus                          |
| 1 | Cellular_org | Thermus aquaticus Y51MC23                  |
| 1 | Cellular_org | Thermus scotoductus                        |
| 1 | Cellular_org | Thermus scotoductus SA-01                  |
| 1 | Cellular_org | Thermus sp. 4C                             |
| 1 | Cellular_org | Thermus thermophilus                       |
| 1 | Cellular_org | Thermus thermophilus HB27                  |
| 1 | Cellular_org | Thermus thermophilus HB8                   |
| 1 | Cellular_org | Thioalkalivibrio sp. HL-EbGR7              |
| 1 | Cellular_org | Thioalkalivibrio sp. K90mix                |
| 1 | Cellular_org | Thiobacillus denitrificans                 |
| 1 | Cellular_org | Thiobacillus denitrificans ATCC 25259      |
| 1 | Cellular_org | Thiomicrospira crunogena                   |
| 1 | Cellular_org | Thiomicrospira crunogena XCL-2             |

|   |              |                                                   |
|---|--------------|---------------------------------------------------|
| 1 | Cellular_org | Thiomonas intermedia K12                          |
| 1 | Cellular_org | Thiomonas sp. 3As                                 |
| 1 | Cellular_org | Tolumonas auensis DSM 9187                        |
| 1 | Cellular_org | Tomato big bud phytoplasma                        |
| 1 | Cellular_org | Treponema denticola                               |
| 1 | Cellular_org | Treponema denticola ATCC 35405                    |
| 1 | Cellular_org | Treponema pallidum                                |
| 1 | Cellular_org | Treponema pallidum subsp. pallidum SS14           |
| 1 | Cellular_org | Treponema pallidum subsp. pallidum str. Nichols   |
| 1 | Cellular_org | Treponema phagedenis                              |
| 1 | Cellular_org | Treponema vincentii                               |
| 1 | Cellular_org | Treponema vincentii ATCC 35580                    |
| 1 | Cellular_org | Trichodesmium erythraeum                          |
| 1 | Cellular_org | Trichodesmium erythraeum IMS101                   |
| 1 | Cellular_org | Tropheryma whipplei                               |
| 1 | Cellular_org | Tropheryma whipplei TW08/27                       |
| 1 | Cellular_org | Tropheryma whipplei str. Twist                    |
| 1 | Cellular_org | Truepera radiovictrix DSM 17093                   |
| 1 | Cellular_org | Tsukamurella paurometabola                        |
| 1 | Cellular_org | Tsukamurella paurometabola DSM 20162              |
| 1 | Cellular_org | Ureaplasma parvum                                 |
| 1 | Cellular_org | Ureaplasma parvum serovar 1 str. ATCC 27813       |
| 1 | Cellular_org | Ureaplasma parvum serovar 14 str. ATCC 33697      |
| 1 | Cellular_org | Ureaplasma parvum serovar 3                       |
| 1 | Cellular_org | Ureaplasma parvum serovar 3 str. ATCC 27815       |
| 1 | Cellular_org | Ureaplasma parvum serovar 3 str. ATCC 700970      |
| 1 | Cellular_org | Ureaplasma parvum serovar 6                       |
| 1 | Cellular_org | Ureaplasma parvum serovar 6 str. ATCC 27818       |
| 1 | Cellular_org | Ureaplasma urealyticum                            |
| 1 | Cellular_org | Ureaplasma urealyticum serovar 10 str. ATCC 33699 |
| 1 | Cellular_org | Ureaplasma urealyticum serovar 11 str. ATCC 33695 |
| 1 | Cellular_org | Ureaplasma urealyticum serovar 12 str. ATCC 33696 |
| 1 | Cellular_org | Ureaplasma urealyticum serovar 13 str. ATCC 33698 |
| 1 | Cellular_org | Ureaplasma urealyticum serovar 2 str. ATCC 27814  |
| 1 | Cellular_org | Ureaplasma urealyticum serovar 4 str. ATCC 27816  |
| 1 | Cellular_org | Ureaplasma urealyticum serovar 5 str. ATCC 27817  |
| 1 | Cellular_org | Ureaplasma urealyticum serovar 7 str. ATCC 27819  |
| 1 | Cellular_org | Ureaplasma urealyticum serovar 8 str. ATCC 27618  |
| 1 | Cellular_org | Ureaplasma urealyticum serovar 9 str. ATCC 33175  |
| 1 | Cellular_org | Variovorax paradoxus                              |
| 1 | Cellular_org | Variovorax paradoxus S110                         |
| 1 | Cellular_org | Veillonella atypica                               |
| 1 | Cellular_org | Veillonella atypica ACS-049-V-Sch6                |

|   |              |                                                     |
|---|--------------|-----------------------------------------------------|
| 1 | Cellular_org | <i>Veillonella atypica</i> ACS-134-V-Col7a          |
| 1 | Cellular_org | <i>Veillonella dispar</i>                           |
| 1 | Cellular_org | <i>Veillonella dispar</i> ATCC 17748                |
| 1 | Cellular_org | <i>Veillonella parvula</i>                          |
| 1 | Cellular_org | <i>Veillonella parvula</i> ATCC 17745               |
| 1 | Cellular_org | <i>Veillonella parvula</i> DSM 2008                 |
| 1 | Cellular_org | <i>Veillonella</i> sp. 3_1_44                       |
| 1 | Cellular_org | <i>Veillonella</i> sp. 6_1_27                       |
| 1 | Cellular_org | <i>Verminephrobacter eiseniae</i>                   |
| 1 | Cellular_org | <i>Verminephrobacter eiseniae</i> EF01-2            |
| 1 | Cellular_org | <i>Verrucomicrobiae bacterium</i> DG1235            |
| 1 | Cellular_org | <i>Verrucomicrobium spinosum</i>                    |
| 1 | Cellular_org | <i>Verrucomicrobium spinosum</i> DSM 4136           |
| 1 | Cellular_org | <i>Vibrio alginolyticus</i>                         |
| 1 | Cellular_org | <i>Vibrio alginolyticus</i> 12G01                   |
| 1 | Cellular_org | <i>Vibrio alginolyticus</i> 40B                     |
| 1 | Cellular_org | <i>Vibrio brasiliensis</i>                          |
| 1 | Cellular_org | <i>Vibrio caribbenthicus</i> ATCC BAA-2122          |
| 1 | Cellular_org | <i>Vibrio cholerae</i>                              |
| 1 | Cellular_org | <i>Vibrio cholerae</i> 12129(1)                     |
| 1 | Cellular_org | <i>Vibrio cholerae</i> 1587                         |
| 1 | Cellular_org | <i>Vibrio cholerae</i> 2740-80                      |
| 1 | Cellular_org | <i>Vibrio cholerae</i> 623-39                       |
| 1 | Cellular_org | <i>Vibrio cholerae</i> AM-19226                     |
| 1 | Cellular_org | <i>Vibrio cholerae</i> B33                          |
| 1 | Cellular_org | <i>Vibrio cholerae</i> BX 330286                    |
| 1 | Cellular_org | <i>Vibrio cholerae</i> CT 5369-93                   |
| 1 | Cellular_org | <i>Vibrio cholerae</i> INDRE 91/1                   |
| 1 | Cellular_org | <i>Vibrio cholerae</i> M66-2                        |
| 1 | Cellular_org | <i>Vibrio cholerae</i> MAK 757                      |
| 1 | Cellular_org | <i>Vibrio cholerae</i> MJ-1236                      |
| 1 | Cellular_org | <i>Vibrio cholerae</i> MO10                         |
| 1 | Cellular_org | <i>Vibrio cholerae</i> MZO-2                        |
| 1 | Cellular_org | <i>Vibrio cholerae</i> MZO-3                        |
| 1 | Cellular_org | <i>Vibrio cholerae</i> NCTC 8457                    |
| 1 | Cellular_org | <i>Vibrio cholerae</i> O1                           |
| 1 | Cellular_org | <i>Vibrio cholerae</i> O1 biovar El Tor             |
| 1 | Cellular_org | <i>Vibrio cholerae</i> O1 biovar El Tor str. N16961 |
| 1 | Cellular_org | <i>Vibrio cholerae</i> O395                         |
| 1 | Cellular_org | <i>Vibrio cholerae</i> RC27                         |
| 1 | Cellular_org | <i>Vibrio cholerae</i> RC385                        |
| 1 | Cellular_org | <i>Vibrio cholerae</i> RC9                          |
| 1 | Cellular_org | <i>Vibrio cholerae</i> TM 11079-80                  |

|   |              |                                                  |
|---|--------------|--------------------------------------------------|
| 1 | Cellular_org | <i>Vibrio cholerae</i> TMA 21                    |
| 1 | Cellular_org | <i>Vibrio cholerae</i> V51                       |
| 1 | Cellular_org | <i>Vibrio cholerae</i> V52                       |
| 1 | Cellular_org | <i>Vibrio cholerae</i> bv. <i>albensis</i>       |
| 1 | Cellular_org | <i>Vibrio cholerae</i> bv. <i>albensis</i> VL426 |
| 1 | Cellular_org | <i>Vibrio coralliilyticus</i>                    |
| 1 | Cellular_org | <i>Vibrio coralliilyticus</i> ATCC BAA-450       |
| 1 | Cellular_org | <i>Vibrio fischeri</i> ES114                     |
| 1 | Cellular_org | <i>Vibrio fischeri</i> MJ11                      |
| 1 | Cellular_org | <i>Vibrio fluvialis</i>                          |
| 1 | Cellular_org | <i>Vibrio furnissii</i>                          |
| 1 | Cellular_org | <i>Vibrio furnissii</i> CIP 102972               |
| 1 | Cellular_org | <i>Vibrio harveyi</i>                            |
| 1 | Cellular_org | <i>Vibrio harveyi</i> 1DA3                       |
| 1 | Cellular_org | <i>Vibrio harveyi</i> ATCC BAA-1116              |
| 1 | Cellular_org | <i>Vibrio harveyi</i> HY01                       |
| 1 | Cellular_org | <i>Vibrio metschnikovii</i>                      |
| 1 | Cellular_org | <i>Vibrio metschnikovii</i> CIP 69.14            |
| 1 | Cellular_org | <i>Vibrio mimicus</i>                            |
| 1 | Cellular_org | <i>Vibrio mimicus</i> VM223                      |
| 1 | Cellular_org | <i>Vibrio mimicus</i> VM573                      |
| 1 | Cellular_org | <i>Vibrio mimicus</i> VM603                      |
| 1 | Cellular_org | <i>Vibrio nigripulchritudo</i>                   |
| 1 | Cellular_org | <i>Vibrio orientalis</i>                         |
| 1 | Cellular_org | <i>Vibrio orientalis</i> CIP 102891              |
| 1 | Cellular_org | <i>Vibrio parahaemolyticus</i>                   |
| 1 | Cellular_org | <i>Vibrio parahaemolyticus</i> 16                |
| 1 | Cellular_org | <i>Vibrio parahaemolyticus</i> AN-5034           |
| 1 | Cellular_org | <i>Vibrio parahaemolyticus</i> AQ3810            |
| 1 | Cellular_org | <i>Vibrio parahaemolyticus</i> AQ4037            |
| 1 | Cellular_org | <i>Vibrio parahaemolyticus</i> K5030             |
| 1 | Cellular_org | <i>Vibrio parahaemolyticus</i> Peru-466          |
| 1 | Cellular_org | <i>Vibrio parahaemolyticus</i> RIMD 2210633      |
| 1 | Cellular_org | <i>Vibrio shilonii</i>                           |
| 1 | Cellular_org | <i>Vibrio shilonii</i> AK1                       |
| 1 | Cellular_org | <i>Vibrio sinaloensis</i>                        |
| 1 | Cellular_org | <i>Vibrio</i> sp. 09022                          |
| 1 | Cellular_org | <i>Vibrio</i> sp. 0908                           |
| 1 | Cellular_org | <i>Vibrio</i> sp. 23023                          |
| 1 | Cellular_org | <i>Vibrio</i> sp. 41                             |
| 1 | Cellular_org | <i>Vibrio</i> sp. AND4                           |
| 1 | Cellular_org | <i>Vibrio</i> sp. Ex25                           |
| 1 | Cellular_org | <i>Vibrio</i> sp. MED222                         |

|   |              |                                                                   |
|---|--------------|-------------------------------------------------------------------|
| 1 | Cellular_org | Vibrio sp. RC341                                                  |
| 1 | Cellular_org | Vibrio sp. RC586                                                  |
| 1 | Cellular_org | Vibrio sp. TC68                                                   |
| 1 | Cellular_org | Vibrio splendidus                                                 |
| 1 | Cellular_org | Vibrio splendidus 12B01                                           |
| 1 | Cellular_org | Vibrio splendidus LGP32                                           |
| 1 | Cellular_org | Vibrio tapetis                                                    |
| 1 | Cellular_org | Vibrio vulnificus                                                 |
| 1 | Cellular_org | Vibrio vulnificus CMCP6                                           |
| 1 | Cellular_org | Vibrio vulnificus YJ016                                           |
| 1 | Cellular_org | Vibrionales bacterium SWAT-3                                      |
| 1 | Cellular_org | Victivallis vadensis ATCC BAA-548                                 |
| 1 | Cellular_org | Waddlia chondrophila                                              |
| 1 | Cellular_org | Waddlia chondrophila WSU 86-1044                                  |
| 1 | Cellular_org | Weissella cibaria                                                 |
| 1 | Cellular_org | Weissella paramesenteroides                                       |
| 1 | Cellular_org | Weissella paramesenteroides ATCC 33313                            |
| 1 | Cellular_org | Wigglesworthia glossinidia                                        |
| 1 | Cellular_org | Wigglesworthia glossinidia endosymbiont of Glossina brevipalpis   |
| 1 | Cellular_org | Wolbachia endosymbiont of Brugia malayi                           |
| 1 | Cellular_org | Wolbachia endosymbiont of Culex quinquefasciatus                  |
| 1 | Cellular_org | Wolbachia endosymbiont of Culex quinquefasciatus JHB              |
| 1 | Cellular_org | Wolbachia endosymbiont of Culex quinquefasciatus Pel              |
| 1 | Cellular_org | Wolbachia endosymbiont of Drosophila ananassae                    |
| 1 | Cellular_org | Wolbachia endosymbiont of Drosophila melanogaster                 |
| 1 | Cellular_org | Wolbachia endosymbiont of Drosophila simulans                     |
| 1 | Cellular_org | Wolbachia endosymbiont of Drosophila willistoni                   |
| 1 | Cellular_org | Wolbachia endosymbiont of Drosophila willistoni TSC#14030-0811.24 |
| 1 | Cellular_org | Wolbachia endosymbiont of Muscidifurax uniraptor                  |
| 1 | Cellular_org | Wolbachia endosymbiont strain TRS of Brugia malayi                |
| 1 | Cellular_org | Wolbachia sp. wRi                                                 |
| 1 | Cellular_org | Wolinella succinogenes                                            |
| 1 | Cellular_org | Wolinella succinogenes DSM 1740                                   |
| 1 | Cellular_org | Xanthobacter autotrophicus                                        |
| 1 | Cellular_org | Xanthobacter autotrophicus Py2                                    |
| 1 | Cellular_org | Xanthomonas albilineans                                           |
| 1 | Cellular_org | Xanthomonas axonopodis                                            |
| 1 | Cellular_org | Xanthomonas axonopodis pv. citri                                  |
| 1 | Cellular_org | Xanthomonas axonopodis pv. citri str. 306                         |
| 1 | Cellular_org | Xanthomonas axonopodis pv. glycines                               |
| 1 | Cellular_org | Xanthomonas campestris                                            |

|   |              |                                                                       |
|---|--------------|-----------------------------------------------------------------------|
| 1 | Cellular_org | <i>Xanthomonas campestris</i> pv. <i>campestris</i>                   |
| 1 | Cellular_org | <i>Xanthomonas campestris</i> pv. <i>campestris</i> str. 8004         |
| 1 | Cellular_org | <i>Xanthomonas campestris</i> pv. <i>campestris</i> str. ATCC 33913   |
| 1 | Cellular_org | <i>Xanthomonas campestris</i> pv. <i>campestris</i> str. B100         |
| 1 | Cellular_org | <i>Xanthomonas campestris</i> pv. <i>musacearum</i>                   |
| 1 | Cellular_org | <i>Xanthomonas campestris</i> pv. <i>musacearum</i> NCPPB4381         |
| 1 | Cellular_org | <i>Xanthomonas campestris</i> pv. <i>vasculorum</i>                   |
| 1 | Cellular_org | <i>Xanthomonas campestris</i> pv. <i>vasculorum</i> NCPPB702          |
| 1 | Cellular_org | <i>Xanthomonas campestris</i> pv. <i>vesicatoria</i> str. 85-10       |
| 1 | Cellular_org | <i>Xanthomonas citri</i>                                              |
| 1 | Cellular_org | <i>Xanthomonas euvesicatoria</i>                                      |
| 1 | Cellular_org | <i>Xanthomonas fuscans</i>                                            |
| 1 | Cellular_org | <i>Xanthomonas fuscans</i> subsp. <i>aurantifolii</i>                 |
| 1 | Cellular_org | <i>Xanthomonas fuscans</i> subsp. <i>aurantifolii</i> str. ICPB 10535 |
| 1 | Cellular_org | <i>Xanthomonas fuscans</i> subsp. <i>aurantifolii</i> str. ICPB 11122 |
| 1 | Cellular_org | <i>Xanthomonas oryzae</i>                                             |
| 1 | Cellular_org | <i>Xanthomonas oryzae</i> pv. <i>oryzae</i>                           |
| 1 | Cellular_org | <i>Xanthomonas oryzae</i> pv. <i>oryzae</i> KACC10331                 |
| 1 | Cellular_org | <i>Xanthomonas oryzae</i> pv. <i>oryzae</i> MAFF 311018               |
| 1 | Cellular_org | <i>Xanthomonas oryzae</i> pv. <i>oryzae</i> PXO99A                    |
| 1 | Cellular_org | <i>Xanthomonas oryzae</i> pv. <i>oryzicola</i>                        |
| 1 | Cellular_org | <i>Xanthomonas oryzae</i> pv. <i>oryzicola</i> BLS256                 |
| 1 | Cellular_org | <i>Xenorhabdus bovienii</i>                                           |
| 1 | Cellular_org | <i>Xenorhabdus bovienii</i> SS-2004                                   |
| 1 | Cellular_org | <i>Xenorhabdus nematophila</i>                                        |
| 1 | Cellular_org | <i>Xenorhabdus nematophila</i> ATCC 19061                             |
| 1 | Cellular_org | <i>Xylanimonas cellulositytica</i> DSM 15894                          |
| 1 | Cellular_org | <i>Xylella fastidiosa</i>                                             |
| 1 | Cellular_org | <i>Xylella fastidiosa</i> 9a5c                                        |
| 1 | Cellular_org | <i>Xylella fastidiosa</i> Dixon                                       |
| 1 | Cellular_org | <i>Xylella fastidiosa</i> M12                                         |
| 1 | Cellular_org | <i>Xylella fastidiosa</i> M23                                         |
| 1 | Cellular_org | <i>Xylella fastidiosa</i> Temecula1                                   |
| 1 | Cellular_org | <i>Xylella fastidiosa</i> subsp. <i>sandyi</i>                        |
| 1 | Cellular_org | <i>Yersinia aldovae</i>                                               |
| 1 | Cellular_org | <i>Yersinia aldovae</i> ATCC 35236                                    |
| 1 | Cellular_org | <i>Yersinia bercovieri</i>                                            |
| 1 | Cellular_org | <i>Yersinia bercovieri</i> ATCC 43970                                 |
| 1 | Cellular_org | <i>Yersinia enterocolitica</i>                                        |
| 1 | Cellular_org | <i>Yersinia enterocolitica</i> (type O:9)                             |
| 1 | Cellular_org | <i>Yersinia enterocolitica</i> subsp. <i>enterocolitica</i>           |
| 1 | Cellular_org | <i>Yersinia enterocolitica</i> subsp. <i>enterocolitica</i> 8081      |
| 1 | Cellular_org | <i>Yersinia frederiksenii</i>                                         |



|   |              |                                                         |
|---|--------------|---------------------------------------------------------|
| 1 | Cellular_org | <i>Yersinia frederiksenii</i> ATCC 33641                |
| 1 | Cellular_org | <i>Yersinia intermedia</i>                              |
| 1 | Cellular_org | <i>Yersinia intermedia</i> ATCC 29909                   |
| 1 | Cellular_org | <i>Yersinia kristensenii</i>                            |
| 1 | Cellular_org | <i>Yersinia kristensenii</i> ATCC 33638                 |
| 1 | Cellular_org | <i>Yersinia mollaretii</i>                              |
| 1 | Cellular_org | <i>Yersinia mollaretii</i> ATCC 43969                   |
| 1 | Cellular_org | <i>Yersinia pestis</i>                                  |
| 1 | Cellular_org | <i>Yersinia pestis</i> Angola                           |
| 1 | Cellular_org | <i>Yersinia pestis</i> Antiqua                          |
| 1 | Cellular_org | <i>Yersinia pestis</i> CA88-4125                        |
| 1 | Cellular_org | <i>Yersinia pestis</i> CO92                             |
| 1 | Cellular_org | <i>Yersinia pestis</i> FV-1                             |
| 1 | Cellular_org | <i>Yersinia pestis</i> KIM 10                           |
| 1 | Cellular_org | <i>Yersinia pestis</i> KIM D27                          |
| 1 | Cellular_org | <i>Yersinia pestis</i> Nepal516                         |
| 1 | Cellular_org | <i>Yersinia pestis</i> Pestoides A                      |
| 1 | Cellular_org | <i>Yersinia pestis</i> Pestoides F                      |
| 1 | Cellular_org | <i>Yersinia pestis</i> Z176003                          |
| 1 | Cellular_org | <i>Yersinia pestis</i> biovar Antiqua str. B42003004    |
| 1 | Cellular_org | <i>Yersinia pestis</i> biovar Antiqua str. E1979001     |
| 1 | Cellular_org | <i>Yersinia pestis</i> biovar Antiqua str. UG05-0454    |
| 1 | Cellular_org | <i>Yersinia pestis</i> biovar Mediaevalis str. K1973002 |
| 1 | Cellular_org | <i>Yersinia pestis</i> biovar Microtus str. 91001       |
| 1 | Cellular_org | <i>Yersinia pestis</i> biovar Orientalis str. F1991016  |
| 1 | Cellular_org | <i>Yersinia pestis</i> biovar Orientalis str. IP275     |
| 1 | Cellular_org | <i>Yersinia pestis</i> biovar Orientalis str. India 195 |
| 1 | Cellular_org | <i>Yersinia pestis</i> biovar Orientalis str. MG05-1020 |
| 1 | Cellular_org | <i>Yersinia pestis</i> biovar Orientalis str. PEXU2     |
| 1 | Cellular_org | <i>Yersinia pseudotuberculosis</i>                      |
| 1 | Cellular_org | <i>Yersinia pseudotuberculosis</i> IP 31758             |
| 1 | Cellular_org | <i>Yersinia pseudotuberculosis</i> IP 32953             |
| 1 | Cellular_org | <i>Yersinia pseudotuberculosis</i> PB1/+                |
| 1 | Cellular_org | <i>Yersinia pseudotuberculosis</i> YPIII                |
| 1 | Cellular_org | <i>Yersinia rohdei</i>                                  |
| 1 | Cellular_org | <i>Yersinia rohdei</i> ATCC 43380                       |
| 1 | Cellular_org | <i>Yersinia ruckeri</i>                                 |
| 1 | Cellular_org | <i>Yersinia ruckeri</i> ATCC 29473                      |
| 1 | Cellular_org | <i>Zunongwangia profunda</i> SM-A87                     |
| 1 | Cellular_org | <i>Zymomonas mobilis</i>                                |
| 1 | Cellular_org | <i>Zymomonas mobilis</i> subsp. mobilis                 |
| 1 | Cellular_org | <i>Zymomonas mobilis</i> subsp. mobilis ATCC 10988      |
| 1 | Cellular_org | <i>Zymomonas mobilis</i> subsp. mobilis CP4             |

|   |              |                                                       |
|---|--------------|-------------------------------------------------------|
| 1 | Cellular_org | Zymomonas mobilis subsp. mobilis NCIMB 11163          |
| 1 | Cellular_org | Zymomonas mobilis subsp. mobilis ZM4                  |
| 1 | Cellular_org | alpha proteobacterium BAL199                          |
| 1 | Cellular_org | alpha proteobacterium HIMB114                         |
| 1 | Cellular_org | alpha proteobacterium endosymbiont of Amoeba proteus  |
| 1 | Cellular_org | bacterium Ellin514                                    |
| 1 | Cellular_org | beta proteobacterium KB13                             |
| 1 | Cellular_org | candidate division TM7 genomosp. GTL1                 |
| 1 | Cellular_org | candidate division TM7 single-cell isolate TM7a       |
| 1 | Cellular_org | candidate division TM7 single-cell isolate TM7b       |
| 1 | Cellular_org | candidate division TM7 single-cell isolate TM7c       |
| 1 | Cellular_org | cyanobacterium UCYN-A                                 |
| 1 | Cellular_org | delta proteobacterium MLMS-1                          |
| 1 | Cellular_org | delta proteobacterium NaphS2                          |
| 1 | Cellular_org | endophytic bacterium LOB-07                           |
| 1 | Cellular_org | gamma proteobacterium HTCC2207                        |
| 1 | Cellular_org | gamma proteobacterium HTCC5015                        |
| 1 | Cellular_org | gamma proteobacterium HdN1                            |
| 1 | Cellular_org | gamma proteobacterium NOR5-3                          |
| 1 | Cellular_org | gamma proteobacterium NOR51-B                         |
| 1 | Cellular_org | marine actinobacterium PHSC20C1                       |
| 1 | Cellular_org | marine gamma proteobacterium HTCC2080                 |
| 1 | Cellular_org | marine gamma proteobacterium HTCC2143                 |
| 1 | Cellular_org | marine gamma proteobacterium HTCC2148                 |
| 1 | Cellular_org | uncultured Termite group 1 bacterium                  |
| 1 | Cellular_org | uncultured Termite group 1 bacterium phylotype Rs-D17 |
| 1 | Cellular_org | uncultured bacterium                                  |
| 1 | Cellular_org | uncultured eubacterium pIE1115                        |
| 1 | Cellular_org | unidentified eubacterium SCB49                        |
| 1 | Cellular_org | Acidianus ambivalens                                  |
| 1 | Cellular_org | Acidianus hospitalis                                  |
| 1 | Cellular_org | Acidilobus saccharovorans 345-15                      |
| 1 | Cellular_org | Aciduliprofundum boonei T469                          |
| 1 | Cellular_org | Aeropyrum pernix                                      |
| 1 | Cellular_org | Aeropyrum pernix K1                                   |
| 1 | Cellular_org | Archaeoglobus fulgidus                                |
| 1 | Cellular_org | Archaeoglobus fulgidus DSM 4304                       |
| 1 | Cellular_org | Archaeoglobus profundus                               |
| 1 | Cellular_org | Archaeoglobus profundus DSM 5631                      |
| 1 | Cellular_org | Caldivirga maquilingensis                             |
| 1 | Cellular_org | Caldivirga maquilingensis IC-167                      |
| 1 | Cellular_org | Candidatus Korarchaeum cryptofilum OPF8               |
| 1 | Cellular_org | Cenarchaeum symbiosum                                 |

|   |              |                                       |
|---|--------------|---------------------------------------|
| 1 | Cellular_org | Cenarchaeum symbiosum A               |
| 1 | Cellular_org | Desulfurococcus                       |
| 1 | Cellular_org | Desulfurococcus kamchatkensis 1221n   |
| 1 | Cellular_org | Desulfurococcus mucosus               |
| 1 | Cellular_org | Ferroglobus placidus                  |
| 1 | Cellular_org | Ferroglobus placidus DSM 10642        |
| 1 | Cellular_org | Ferroplasma acidarmanus fer1          |
| 1 | Cellular_org | Haladaptatus paucihalophilus DX253    |
| 1 | Cellular_org | Halalkalicoccus jeotgali B3           |
| 1 | Cellular_org | Haloarcula                            |
| 1 | Cellular_org | Haloarcula marismortui                |
| 1 | Cellular_org | Haloarcula marismortui ATCC 43049     |
| 1 | Cellular_org | Haloarcula sp. AS7094                 |
| 1 | Cellular_org | Halobacterium salinarum               |
| 1 | Cellular_org | Halobacterium salinarum R1            |
| 1 | Cellular_org | Halobacterium sp. GN101               |
| 1 | Cellular_org | Halobacterium sp. NRC-1               |
| 1 | Cellular_org | Haloferax volcanii                    |
| 1 | Cellular_org | Haloferax volcanii DS2                |
| 1 | Cellular_org | Halogeometricum borinquense           |
| 1 | Cellular_org | Halogeometricum borinquense DSM 11551 |
| 1 | Cellular_org | Halomicrobium mukohataei              |
| 1 | Cellular_org | Halomicrobium mukohataei DSM 12286    |
| 1 | Cellular_org | Haloquadratum walsbyi                 |
| 1 | Cellular_org | Haloquadratum walsbyi DSM 16790       |
| 1 | Cellular_org | Halorhabdus utahensis                 |
| 1 | Cellular_org | Halorhabdus utahensis DSM 12940       |
| 1 | Cellular_org | Halorubrum lacusprofundi              |
| 1 | Cellular_org | Halorubrum lacusprofundi ATCC 49239   |
| 1 | Cellular_org | Halorubrum saccharovororum            |
| 1 | Cellular_org | Haloterrigena thermotolerans          |
| 1 | Cellular_org | Haloterrigena turkmenica              |
| 1 | Cellular_org | Haloterrigena turkmenica DSM 5511     |
| 1 | Cellular_org | Hyperthermus butylicus                |
| 1 | Cellular_org | Hyperthermus butylicus DSM 5456       |
| 1 | Cellular_org | Ignicoccus hospitalis KIN4/I          |
| 1 | Cellular_org | Ignisphaera aggregans                 |
| 1 | Cellular_org | Ignisphaera aggregans DSM 17230       |
| 1 | Cellular_org | Metallosphaera sedula                 |
| 1 | Cellular_org | Metallosphaera sedula DSM 5348        |
| 1 | Cellular_org | Methanobrevibacter ruminantium        |
| 1 | Cellular_org | Methanobrevibacter ruminantium M1     |
| 1 | Cellular_org | Methanobrevibacter smithii            |

|   |              |                                        |
|---|--------------|----------------------------------------|
| 1 | Cellular_org | Methanobrevibacter smithii ATCC 35061  |
| 1 | Cellular_org | Methanobrevibacter smithii DSM 2374    |
| 1 | Cellular_org | Methanobrevibacter smithii DSM 2375    |
| 1 | Cellular_org | Methanocaldococcus fervens AG86        |
| 1 | Cellular_org | Methanocaldococcus infernus            |
| 1 | Cellular_org | Methanocaldococcus infernus ME         |
| 1 | Cellular_org | Methanocaldococcus jannaschii          |
| 1 | Cellular_org | Methanocaldococcus jannaschii DSM 2661 |
| 1 | Cellular_org | Methanocaldococcus sp. FS406-22        |
| 1 | Cellular_org | Methanocaldococcus vulcanius M7        |
| 1 | Cellular_org | Methanocella paludicola SANA E         |
| 1 | Cellular_org | Methanococcoides burtonii              |
| 1 | Cellular_org | Methanococcoides burtonii DSM 6242     |
| 1 | Cellular_org | Methanococcus aeolicus                 |
| 1 | Cellular_org | Methanococcus aeolicus Nankai-3        |
| 1 | Cellular_org | Methanococcus maripaludis              |
| 1 | Cellular_org | Methanococcus maripaludis C5           |
| 1 | Cellular_org | Methanococcus maripaludis C6           |
| 1 | Cellular_org | Methanococcus maripaludis C7           |
| 1 | Cellular_org | Methanococcus maripaludis S2           |
| 1 | Cellular_org | Methanococcus vannieli                 |
| 1 | Cellular_org | Methanococcus vannieli SB              |
| 1 | Cellular_org | Methanococcus voltae                   |
| 1 | Cellular_org | Methanococcus voltae A3                |
| 1 | Cellular_org | Methanocorpusculum labreanum           |
| 1 | Cellular_org | Methanocorpusculum labreanum Z         |
| 1 | Cellular_org | Methanoculleus marisnigri JR1          |
| 1 | Cellular_org | Methanohalobium evestigatum            |
| 1 | Cellular_org | Methanohalobium evestigatum Z-7303     |
| 1 | Cellular_org | Methanohalophilus mahii                |
| 1 | Cellular_org | Methanohalophilus mahii DSM 5219       |
| 1 | Cellular_org | Methanoplanus petrolearius DSM 11571   |
| 1 | Cellular_org | Methanopyrus kandleri                  |
| 1 | Cellular_org | Methanopyrus kandleri AV19             |
| 1 | Cellular_org | Methanosaeta thermophila PT            |
| 1 | Cellular_org | Methanosarcina acetivorans             |
| 1 | Cellular_org | Methanosarcina acetivorans C2A         |
| 1 | Cellular_org | Methanosarcina barkeri                 |
| 1 | Cellular_org | Methanosarcina barkeri str. Fusaro     |
| 1 | Cellular_org | Methanosarcina mazei                   |
| 1 | Cellular_org | Methanosarcina mazei Go1               |
| 1 | Cellular_org | Methanosphaera stadtmanae              |
| 1 | Cellular_org | Methanosphaera stadtmanae DSM 3091     |

|   |              |                                                     |
|---|--------------|-----------------------------------------------------|
| 1 | Cellular_org | Methanosphaerula palustris                          |
| 1 | Cellular_org | Methanosphaerula palustris E1-9c                    |
| 1 | Cellular_org | Methanospirillum hungatei JF-1                      |
| 1 | Cellular_org | Methanothermobacter marburgensis                    |
| 1 | Cellular_org | Methanothermobacter marburgensis str. Marburg       |
| 1 | Cellular_org | Methanothermobacter thermautotrophicus              |
| 1 | Cellular_org | Methanothermobacter thermautotrophicus str. Delta H |
| 1 | Cellular_org | Methanothermococcus okinawensis                     |
| 1 | Cellular_org | Methanothermococcus okinawensis IH1                 |
| 1 | Cellular_org | Methanothermus fervidus                             |
| 1 | Cellular_org | Methanothermus fervidus DSM 2088                    |
| 1 | Cellular_org | Nanoarchaeum equitans Kin4-M                        |
| 1 | Cellular_org | Natrialba magadii                                   |
| 1 | Cellular_org | Natrialba magadii ATCC 43099                        |
| 1 | Cellular_org | Natrinema sp. CX2021                                |
| 1 | Cellular_org | Natronobacterium sp. AS-7091                        |
| 1 | Cellular_org | Natronomonas pharaonis                              |
| 1 | Cellular_org | Natronomonas pharaonis DSM 2160                     |
| 1 | Cellular_org | Nitrosopumilus maritimus                            |
| 1 | Cellular_org | Nitrosopumilus maritimus SCM1                       |
| 1 | Cellular_org | Picrophilus torridus                                |
| 1 | Cellular_org | Picrophilus torridus DSM 9790                       |
| 1 | Cellular_org | Pyrobaculum aerophilum                              |
| 1 | Cellular_org | Pyrobaculum aerophilum str. IM2                     |
| 1 | Cellular_org | Pyrobaculum arsenaticum                             |
| 1 | Cellular_org | Pyrobaculum arsenaticum DSM 13514                   |
| 1 | Cellular_org | Pyrobaculum calidifontis                            |
| 1 | Cellular_org | Pyrobaculum calidifontis JCM 11548                  |
| 1 | Cellular_org | Pyrobaculum islandicum                              |
| 1 | Cellular_org | Pyrobaculum islandicum DSM 4184                     |
| 1 | Cellular_org | Pyrococcus abyssi                                   |
| 1 | Cellular_org | Pyrococcus abyssi GE5                               |
| 1 | Cellular_org | Pyrococcus furiosus                                 |
| 1 | Cellular_org | Pyrococcus furiosus DSM 3638                        |
| 1 | Cellular_org | Pyrococcus horikoshii                               |
| 1 | Cellular_org | Pyrococcus horikoshii OT3                           |
| 1 | Cellular_org | Pyrococcus sp. 12/1                                 |
| 1 | Cellular_org | Pyrococcus sp. JT1                                  |
| 1 | Cellular_org | Staphylothermus hellenicus                          |
| 1 | Cellular_org | Staphylothermus hellenicus DSM 12710                |
| 1 | Cellular_org | Staphylothermus marinus                             |
| 1 | Cellular_org | Staphylothermus marinus F1                          |
| 1 | Cellular_org | Sulfolobus acidocaldarius                           |

|   |              |                                       |
|---|--------------|---------------------------------------|
| 1 | Cellular_org | Sulfolobus acidocaldarius DSM 639     |
| 1 | Cellular_org | Sulfolobus islandicus                 |
| 1 | Cellular_org | Sulfolobus islandicus L.D.8.5         |
| 1 | Cellular_org | Sulfolobus islandicus L.S.2.15        |
| 1 | Cellular_org | Sulfolobus islandicus M.14.25         |
| 1 | Cellular_org | Sulfolobus islandicus M.16.27         |
| 1 | Cellular_org | Sulfolobus islandicus M.16.4          |
| 1 | Cellular_org | Sulfolobus islandicus Y.G.57.14       |
| 1 | Cellular_org | Sulfolobus islandicus Y.N.15.51       |
| 1 | Cellular_org | Sulfolobus neozealandicus             |
| 1 | Cellular_org | Sulfolobus solfataricus               |
| 1 | Cellular_org | Sulfolobus solfataricus 98/2          |
| 1 | Cellular_org | Sulfolobus solfataricus P2            |
| 1 | Cellular_org | Sulfolobus sp. NOB8H2                 |
| 1 | Cellular_org | Sulfolobus tengchongensis             |
| 1 | Cellular_org | Sulfolobus tokodaii                   |
| 1 | Cellular_org | Sulfolobus tokodaii str. 7            |
| 1 | Cellular_org | Thermococcus barophilus MP            |
| 1 | Cellular_org | Thermococcus gammatolerans EJ3        |
| 1 | Cellular_org | Thermococcus kodakarensis KOD1        |
| 1 | Cellular_org | Thermococcus nautilus                 |
| 1 | Cellular_org | Thermococcus onnurineus               |
| 1 | Cellular_org | Thermococcus onnurineus NA1           |
| 1 | Cellular_org | Thermococcus sibiricus MM 739         |
| 1 | Cellular_org | Thermococcus sp. 26/2                 |
| 1 | Cellular_org | Thermococcus sp. AM4                  |
| 1 | Cellular_org | Thermococcus sp. AMT11                |
| 1 | Cellular_org | Thermofilum pendens                   |
| 1 | Cellular_org | Thermofilum pendens Hrk 5             |
| 1 | Cellular_org | Thermoplasma acidophilum              |
| 1 | Cellular_org | Thermoplasma acidophilum DSM 1728     |
| 1 | Cellular_org | Thermoplasma volcanium                |
| 1 | Cellular_org | Thermoplasma volcanium GSS1           |
| 1 | Cellular_org | Thermoproteus neutrophilus            |
| 1 | Cellular_org | Thermoproteus neutrophilus V24Sta     |
| 1 | Cellular_org | Thermosphaera aggregans DSM 11486     |
| 1 | Cellular_org | Vulcanisaeta distributa               |
| 1 | Cellular_org | Vulcanisaeta distributa DSM 14429     |
| 1 | Cellular_org | uncultured methanogenic archaeon RC-I |
| 2 | Eukaryota    | Arabidopsis thaliana                  |
| 2 | Eukaryota    | Chlamydomonas reinhardtii             |
| 2 | Eukaryota    | Cucumis sativus                       |
| 2 | Eukaryota    | Cyanidioschyzon merolae strain 10D    |

|   |              |                                               |
|---|--------------|-----------------------------------------------|
| 2 | Eukaryota    | Cyanophora paradoxa                           |
| 2 | Eukaryota    | Dictyostelium discoideum AX4                  |
| 2 | Eukaryota    | Entamoeba histolytica HM-1:IMSS               |
| 2 | Eukaryota    | Giardia lamblia ATCC 50803                    |
| 2 | Eukaryota    | Leishmania braziliensis MHOM/BR/75/M2904      |
| 2 | Eukaryota    | Paramecium tetraurelia strain d4-2            |
| 2 | Eukaryota    | Physcomitrella patens subsp. patens           |
| 2 | Eukaryota    | Phytophthora infestans T30-4                  |
| 2 | Eukaryota    | Picea sitchensis                              |
| 2 | Eukaryota    | Plasmodium falciparum 3D7                     |
| 2 | Eukaryota    | Tetrahymena thermophila                       |
| 2 | Eukaryota    | Thalassiosira pseudonana CCMP1335             |
| 2 | Eukaryota    | Toxoplasma gondii ME49                        |
| 2 | Eukaryota    | Trichomonas vaginalis G3                      |
| 2 | Eukaryota    | Trypanosoma brucei TREU927                    |
| 3 | Opisthokonts | Ashbya gossypii ATCC 10895                    |
| 3 | Opisthokonts | Aspergillus fumigatus Af293                   |
| 3 | Opisthokonts | Aspergillus nidulans FGSC A4                  |
| 3 | Opisthokonts | Candida dubliniensis CD36                     |
| 3 | Opisthokonts | Candida glabrata CBS 138                      |
| 3 | Opisthokonts | Cryptococcus neoformans var. neoformans JEC21 |
| 3 | Opisthokonts | Debaryomyces hansenii CBS767                  |
| 3 | Opisthokonts | Encephalitozoon cuniculi GB-M1                |
| 3 | Opisthokonts | Gibberella zeae PH-1                          |
| 3 | Opisthokonts | Kluyveromyces lactis NRRL Y-1140              |
| 3 | Opisthokonts | Magnaporthe oryzae 70-15                      |
| 3 | Opisthokonts | Monosiga brevicollis MX1                      |
| 3 | Opisthokonts | Neurospora crassa OR74A                       |
| 3 | Opisthokonts | Pichia pastoris GS115                         |
| 3 | Opisthokonts | Saccharomyces cerevisiae S288c                |
| 3 | Opisthokonts | Scheffersomyces stipitis CBS 6054             |
| 3 | Opisthokonts | Schizosaccharomyces pombe                     |
| 3 | Opisthokonts | Ustilago maydis 521                           |
| 3 | Opisthokonts | Yarrowia lipolytica CLIB122                   |
| 4 | Metazoa      | Amphimedon queenslandica                      |
| 4 | Metazoa      | Tetranychus urticae                           |
| 5 | Eumetazoa    | Hydra magnipapillata                          |
| 5 | Eumetazoa    | Nematostella vectensis                        |
| 5 | Eumetazoa    | Trichoplax adhaerens                          |
| 6 | Bilateria    | Bos taurus                                    |
| 6 | Bilateria    | Canis lupus familiaris                        |
| 6 | Bilateria    | Danio rerio                                   |
| 6 | Bilateria    | Gallus gallus                                 |

|    |                             |                               |
|----|-----------------------------|-------------------------------|
| 6  | Bilateria                   | Homo sapiens                  |
| 6  | Bilateria                   | Mus musculus                  |
| 6  | Bilateria                   | Pan troglodytes               |
| 6  | Bilateria                   | Rattus norvegicus             |
| 6  | Bilateria                   | Saccoglossus kowalevskii      |
| 6  | Bilateria                   | Strongylocentrotus purpuratus |
| 6  | Bilateria                   | Tetraodon nigroviridis        |
| 6  | Bilateria                   | Xenopus laevis                |
| 7  | Protostomia                 | Acyrtosiphon pisum            |
| 7  | Protostomia                 | Apis mellifera                |
| 7  | Protostomia                 | Caenorhabditis elegans        |
| 7  | Protostomia                 | Daphnia pulex                 |
| 7  | Protostomia                 | Drosophila melanogaster       |
| 8  | Lophotrochozoa<br>/Annelida | Capitella teleta              |
| 8  | Lophotrochozoa<br>/Annelida | Helobdella robusta            |
| 8  | Lophotrochozoa<br>/Annelida | Schistosoma japonicum         |
| 9  | Mollusca/Gastro<br>poda     | Aplysia californica           |
| 9  | Mollusca/Gastro<br>poda     | Lottia gigantea               |
| 10 | Mollusca/Bivalvi<br>a       | Pinctada fucata               |
| 10 | Mollusca/Bivalvi<br>a       | Crassostrea gigas             |
